# Supplementary material for: Improvement of Endothelial Dysfunction of Berberine in Atherosclerotic Mice and Mechanism Exploring through TMT-Based Proteomics
Source: Oxid Med Cell Longev. 2020 May 31;2020:8683404. doi: 10.1155/2020/8683404 (PMC7284929; doi:10.1155/2020/8683404)
Supplement: Supplementary 1 — Supplementary Table 1: the list of quantitative proteins. [file 8683404.f1.xlsx]

## Sheet: Supplementary Table 1
Supplementary Table 1. The list of quantitative proteins
Protein IDs	Protein names	Gene names	Peptides	Unique Peptides	Sequence coverage [%]	Mol. weight [kDa]	PSMs
G5E870	E3 ubiquitin-protein ligase TRIP12 (EC 2.3.2.26) (HECT-type E3 ubiquitin transferase TRIP12) (Thyroid receptor-interacting protein 12) (TR-interacting protein 12) (TRIP-12)	Trip12	2	2	1.03704	224	2
P06339	H-2 class I histocompatibility antigen, D-37 alpha chain	H2-T23	3	1	8.68347	40.8	8
A0A0G2JH17	Integrator complex subunit 1	Ints1	2	2	0.720072	247.8	2
D3YV00	Phospholipid-transporting ATPase (EC 7.6.2.1)	Atp9b	2	2	2.00698	129	2
Q6ZPZ3	Zinc finger CCCH domain-containing protein 4	Zc3h4 Kiaa1064	1	1	0.843558	140.9	1
P61014	Cardiac phospholamban (PLB)	Pln	1	1	21.1538	6.1	2
E9Q3H6	Coenzyme Q10A	Coq10a	3	3	10.4247	28.9	3
Q61406	Complement factor H-related 1 (Complement factor H-related protein)	Cfhr1 Cfhl1	2	2	6.12245	38.4	2
Q6PDI6	Ubiquitin carboxyl-terminal hydrolase MINDY-2 (EC 3.4.19.12) (Deubiquitinating enzyme MINDY-2) (Protein FAM63B)	Mindy2 Fam63b Kiaa1164	2	2	4.49251	65.6	3
Q924T2	28S ribosomal protein S2, mitochondrial (MRP-S2) (S2mt)	Mrps2	3	2	7.90378	32.3	3
A2AR02	Peptidyl-prolyl cis-trans isomerase G (PPIase G) (Peptidyl-prolyl isomerase G) (EC 5.2.1.8) (Cyclophilin G) (Rotamase G)	Ppig	1	1	1.32979	88.3	1
Q9EPM5	Syncoilin (Syncoilin intermediate filament 1) (Syncoilin-1)	Sync Sync1	3	3	7.23404	53.6	3
P35831	Tyrosine-protein phosphatase non-receptor type 12 (EC 3.1.3.48) (MPTP-PEST) (Protein-tyrosine phosphatase P19) (P19-PTP)	Ptpn12	2	2	1.80645	86.5	2
G3X8P9	Aldehyde oxidase 1	Aox1 mCG_117465	5	5	4.05101	146.6	6
Q9EPU4	Cleavage and polyadenylation specificity factor subunit 1 (Cleavage and polyadenylation specificity factor 160 kDa subunit) (CPSF 160 kDa subunit)	Cpsf1 Cpsf160	2	2	0.902151	160.7	2
Q9D0R8	Protein LSM12 homolog	Lsm12	3	3	14.8718	21.7	3
Q8R1L8	Angiopoietin-like protein 8 (Betatrophin) (Lipasin) (Refeeding-induced fat and liver protein)	Angptl8 Gm6484 Rifl	1	1	5.05051	22.1	1
Q9CQ48	NudC domain-containing protein 2	Nudcd2 D11Ertd603e	1	1	7.00637	17.6	1
Q0VBL3	RNA-binding protein 15 (One-twenty two protein 1) (RNA-binding motif protein 15)	Rbm15 Kiaa4257 Ott1	2	2	2.9106	105.7	2
Q64213	Splicing factor 1 (CW17) (Mammalian branch point-binding protein) (BBP) (mBBP) (Transcription factor ZFM1) (mZFM) (Zinc finger gene in MEN1 locus) (Zinc finger protein 162)	Sf1 Zfm1 Zfp162	1	1	1.99081	70.4	1
A0A0R4J2C1	Amyloid-beta A4 precursor protein-binding family B member 1	Apbb1	1	1	2.25352	77.4	1
Q921G8	Gamma-tubulin complex component 2 (GCP-2)	Tubgcp2 Gcp2	1	1	1.43646	103.2	2
P61924	Coatomer subunit zeta-1 (Zeta-1-coat protein) (Zeta-1 COP)	Copz1 Copz	2	2	11.8644	20.2	4
Q91VZ6	Stromal membrane-associated protein 1	Smap1	2	1	4.09091	47.6	3
Q91ZR1	Ras-related protein Rab-4B	Rab4b Rab4	5	3	31.4554	23.6	13
Q9D1Q4	Dolichol-phosphate mannosyltransferase subunit 3 (Dolichol-phosphate mannose synthase subunit 3) (DPM synthase subunit 3) (Dolichyl-phosphate beta-D-mannosyltransferase subunit 3) (Mannose-P-dolichol synthase subunit 3) (MPD synthase subunit 3)	Dpm3	1	1	13.0435	10.1	1
Q9DCW5	Cytochrome c oxidase subunit 6A, mitochondrial (Cytochrome c oxidase polypeptide VIa)	Cox6a1 mCG_19235	1	1	14.2857	12.5	7
Q3UHJ0	AP2-associated protein kinase 1 (EC 2.7.11.1) (Adaptor-associated kinase 1)	Aak1 Kiaa1048	3	3	3.64964	103.3	5
E9QJV4	Pre-mRNA-processing factor 39	Prpf39	1	1	1.20301	77.9	1
Q64429	Cytochrome P450 1B1 (EC 1.14.14.-) (CYPIB1) (Cytochrome P450CMEF) (Cytochrome P450EF) (Hydroperoxy icosatetraenoate dehydratase) (EC 4.2.1.152)	Cyp1b1 Cyp1-b1	2	2	3.49908	60.5	3
Q80ZM8	Cardiolipin synthase (CMP-forming) (CLS) (EC 2.7.8.41)	Crls1	1	1	6.60066	32.5	1
Q9DCH6	AN1-type zinc finger protein 6 (Associated with PRK1 protein) (Zinc finger A20 domain-containing protein 3)	Zfand6 Awp1 Za20d3	1	1	5.38117	24	1
Q99JR8	SWI/SNF-related matrix-associated actin-dependent regulator of chromatin subfamily D member 2 (60 kDa BRG-1/Brm-associated factor subunit B) (BRG1-associated factor 60B) (BAF60B)	Smarcd2 Baf60b	3	2	7.34463	59	3
Q8C147	Dedicator of cytokinesis protein 8	Dock8	2	2	0.857143	238.8	3
Q9EPL9	Peroxisomal acyl-coenzyme A oxidase 3 (EC 1.3.3.6) (Branched-chain acyl-CoA oxidase) (BRCACox) (Pristanoyl-CoA oxidase)	Acox3	1	1	2	78.4	1
P01910	H-2 class II histocompatibility antigen, A-K alpha chain	H2-Aa	1	1	4.6875	28.3	1
Q9Z2T6	Keratin, type II cuticular Hb5 (Keratin-85) (K85) (Type II hair keratin Hb5) (Type-II keratin Kb25)	Krt85 Krt2-18 Krthb5	11	2	16.7653	55.7	27
Q6PDY2	2-aminoethanethiol dioxygenase (EC 1.13.11.19) (Cysteamine dioxygenase)	Ado Gm237	4	4	17.9688	28.4	5
G5E8R8	UBX domain-containing protein 7	Ubxn7 mCG_129950	1	1	2.65849	54.8	1
Q8BNW9	Kelch repeat and BTB domain-containing protein 11	Kbtbd11 Kiaa0711	4	4	8.68878	67.9	5
Q91YU6	Leucine zipper putative tumor suppressor 2 (Protein LAPSER1)	Lzts2 Kiaa1813 Lapser1	1	1	1.49031	72.5	1
Q9QZU9	Ubiquitin/ISG15-conjugating enzyme E2 L6 (EC 2.3.2.23) (E2 ubiquitin-conjugating enzyme L6) (UbcM8) (Ubiquitin carrier protein L6) (Ubiquitin-protein ligase L6)	Ube2l6 Ubce8	1	1	9.80392	17.8	1
G3X9W0	Heterogeneous nuclear ribonucleoprotein D, isoform CRA_a (Heterogeneous nuclear ribonucleoprotein D0)	Hnrnpd Hnrpd mCG_15538	9	1	28.869	36.2	12
Q99KE1	NAD-dependent malic enzyme, mitochondrial (NAD-ME) (EC 1.1.1.38) (Malic enzyme 2)	Me2	3	2	5.94228	65.8	3
Q9JL35	High mobility group nucleosome-binding domain-containing protein 5 (Nucleosome-binding protein 1) (Nucleosome-binding protein 45) (NBP-45) (Protein GARP45)	Hmgn5 Garp45 Nsbp1	1	1	1.97044	45.3	1
A2ASZ8	Calcium-binding mitochondrial carrier protein SCaMC-2 (Small calcium-binding mitochondrial carrier protein 2) (Solute carrier family 25 member 25)	Slc25a25 Kiaa1896 Scamc2	1	1	2.34542	52.6	1
Q6AXD2	Abi2 protein (Abl interactor 2)	Abi2	2	1	4.10678	52.9	3
P35917	Vascular endothelial growth factor receptor 3 (VEGFR-3) (EC 2.7.10.1) (Fms-like tyrosine kinase 4) (FLT-4) (Tyrosine-protein kinase receptor FLT4)	Flt4 Flt-4 Vegfr3	2	1	1.17388	152.9	3
Q8BHF7	CDP-diacylglycerol--glycerol-3-phosphate 3-phosphatidyltransferase, mitochondrial (EC 2.7.8.5) (Phosphatidylglycerophosphate synthase 1) (PGP synthase 1) (Silencer-associated factor)	Pgs1 Saf	1	1	1.62749	62.5	1
F8WGX5	DmX-like protein 1	Dmxl1	2	2	0.46281	337.2	2
Q9D711	Pirin (EC 1.13.11.24) (Probable quercetin 2,3-dioxygenase PIR) (Probable quercetinase)	Pir	1	1	3.10345	32	2
Q8R001	Microtubule-associated protein RP/EB family member 2 (APC-binding protein EB2) (End-binding protein 2) (EB2)	Mapre2	1	1	5.82822	36.9	1
A2A8U2	Transmembrane protein 201 (Spindle-associated membrane protein 1)	Tmem201 D4Ertd429e Net5 Samp1	2	2	3.91566	72.5	2
P60202	Myelin proteolipid protein (PLP) (Lipophilin)	Plp1 Plp	1	1	3.61011	30.1	1
P48999	Arachidonate 5-lipoxygenase (5-LO) (5-lipoxygenase) (EC 1.13.11.34)	Alox5	3	2	3.26409	77.9	3
Q60805	Tyrosine-protein kinase Mer (EC 2.7.10.1) (Proto-oncogene c-Mer) (Receptor tyrosine kinase MerTK)	Mertk Mer	1	1	0.905433	110.1	1
P0C0A3	Charged multivesicular body protein 6 (Chromatin-modifying protein 6)	Chmp6	2	2	9.5	23.4	2
Q9ER39	Torsin-1A (Dystonia 1 protein) (Torsin ATPase 1) (EC 3.6.4.-) (Torsin family 1 member A)	Tor1a Dyt1	2	2	6.30631	37.8	2
P58321	Ubiquitin carboxyl-terminal hydrolase isozyme L4 (UCH-L4) (EC 3.4.19.12) (Ubiquitin thioesterase L4)	Uchl4	5	5	26.6094	26.4	5
Q9JHW9	Aldehyde dehydrogenase family 1 member A3 (EC 1.2.1.36) (Aldehyde dehydrogenase 6) (Retinaldehyde dehydrogenase 3) (RALDH-3) (RalDH3)	Aldh1a3 Aldh6 Raldh3	2	1	4.10156	56.1	9
Q8VEG4	Exonuclease 3'-5' domain-containing protein 2 (EC 3.1.11.1) (Exonuclease 3'-5' domain-like-containing protein 2)	Exd2 Exdl2	1	1	1.07692	74.3	1
Q80UW2	F-box only protein 2	Fbxo2 Fbs1 Fbx2	2	2	7.40741	33.7	3
B2RQ71	Dip2c protein (Disco-interacting protein 2 homolog C)	Dip2c	5	3	4.37018	170.8	7
Q8BJH1	Zinc finger C2HC domain-containing protein 1A	Zc2hc1a Fam164a	2	2	2.77778	35.1	2
E9Q481	Serine/threonine-protein phosphatase 4 regulatory subunit 3A	Ppp4r3a Smek1	1	1	2.28091	95.3	1
G5E8J6	Histidine rich calcium binding protein, isoform CRA_a (Histidine-rich calcium-binding protein)	Hrc mCG_23168	2	2	3.65854	85.1	2
Q99N57	RAF proto-oncogene serine/threonine-protein kinase (EC 2.7.11.1) (Proto-oncogene c-RAF) (cRaf) (Raf-1)	Raf1 Craf	2	1	2.00617	72.9	2
Q8K2C9	Very-long-chain (3R)-3-hydroxyacyl-CoA dehydratase 3 (EC 4.2.1.134) (3-hydroxyacyl-CoA dehydratase 3) (HACD3) (Butyrate-induced protein 1) (B-ind1) (Protein-tyrosine phosphatase-like A domain-containing protein 1)	Hacd3 Ptplad1	1	1	3.03867	43.1	2
D3Z6D5	Fasciculation and elongation protein zeta-2	Fez2	1	1	2.4	42	1
Q6ZPF4	Formin-like protein 3	Fmnl3 Frl2 Kiaa2014	3	2	2.62646	117.1	3
Q9CWU6	Ubiquinol-cytochrome-c reductase complex assembly factor 1 (Basic FGF-repressed Zic-binding protein) (mbFZb) (Ubiquinol-cytochrome c reductase complex chaperone CBP3 homolog)	Uqcc1 Bfzb Uqcc	1	1	3.38983	34.3	1
P70232	Neural cell adhesion molecule L1-like protein (Cell adhesion molecule with homology to L1CAM) (Chl1-like protein) (Close homolog of L1) [Cleaved into: Processed neural cell adhesion molecule L1-like protein]	Chl1 Call	1	1	1.40612	135	1
Q9D0B6	Protein PBDC1 (Polysaccharide biosynthesis domain-containing protein 1)	Pbdc1	3	3	17.1717	22.2	3
Q9CR24	Nucleoside diphosphate-linked moiety X motif 8 (Nudix motif 8) (EC 3.6.1.-)	Nudt8	1	1	6.19048	23.2	1
Q6PAM1	Alpha-taxilin	Txlna Txln	3	2	6.31769	62.3	7
P48410	ATP-binding cassette sub-family D member 1 (EC 7.6.2.4) (Adrenoleukodystrophy protein) (ALDP)	Abcd1 Ald Aldgh	2	2	3.26087	81.8	3
Q9CPT4	Myeloid-derived growth factor (MYDGF)	Mydgf D17Wsu104e	1	1	4.21687	18	1
Q9JJV2	Profilin-2 (Profilin II)	Pfn2	2	2	20	15	3
Q3TWN3	Metal transporter CNNM2 (Ancient conserved domain-containing protein 2) (mACDP2) (Cyclin-M2)	Cnnm2 Acdp2	1	1	0.914286	96.6	1
Q8VE22	28S ribosomal protein S23, mitochondrial (MRP-S23) (S23mt)	Mrps23	2	2	13.5593	20.3	2
Q8K2X3	CST complex subunit STN1 (Alpha-accessory factor of 44 kDa) (AAF-44) (AAF44) (Oligonucleotide/oligosaccharide-binding fold-containing protein 1) (Suppressor of cdc thirteen homolog)	Stn1 Obfc1	2	2	4.7619	43.5	2
Q3UWL8	Prefoldin subunit 4	Pfdn4	1	1	8.95522	15.2	1
A0A0R4J1Q7	Ectonucleotide pyrophosphatase/phosphodiesterase 1, isoform CRA_a (Ectonucleotide pyrophosphatase/phosphodiesterase family member 1)	Enpp1 mCG_9001	2	2	2.09713	103.1	3
G3XA20	Glutamate receptor-interacting protein 2 (MCG130431, isoform CRA_a)	Grip2 mCG_130431	2	2	1.63148	112.2	2
Q9R0A0	Peroxisomal membrane protein PEX14 (PTS1 receptor-docking protein) (Peroxin-14) (Peroxisomal membrane anchor protein PEX14)	Pex14	1	1	2.92553	41.2	1
Q9DCJ9	N-acetylneuraminate lyase (NALase) (EC 4.1.3.3) (N-acetylneuraminate pyruvate-lyase) (N-acetylneuraminic acid aldolase) (Sialate lyase) (Sialate-pyruvate lyase) (Sialic acid aldolase) (Sialic acid lyase)	Npl	1	1	3.4375	35.1	1
Q91WG4	Elongator complex protein 2 (ELP2) (STAT3-interacting protein 1) (StIP1)	Elp2 Statip1	4	4	5.41516	93	4
P41234	ATP-binding cassette sub-family A member 2 (ATP-binding cassette transporter 2) (ATP-binding cassette 2)	Abca2 Abc2	2	2	0.780608	270.3	2
Q3UPH1	Protein PRRC1 (Proline-rich and coiled-coil-containing protein 1)	Prrc1	3	3	7.44921	46.3	4
Q3U7K7	E3 ubiquitin-protein ligase TRIM21	Trim21	2	2	5.84416	53.3	2
Q9WTK7	Serine/threonine-protein kinase STK11 (EC 2.7.11.1) (Liver kinase B1 homolog) (LKB1) (mLKB1)	Stk11 Lkb1	1	1	3.21101	49.2	1
Q8BGF3	WD repeat-containing protein 92 (WD repeat-containing protein Monad)	Wdr92	2	2	5.04202	39.8	3
Q9QYK5	Heparan-sulfate 6-O-sulfotransferase 1 (HS6ST-1) (mHS6ST-1) (EC 2.8.2.-)	Hs6st1	1	1	1.70316	48.3	1
Q9CYN9	Renin receptor (ATPase H(+)-transporting lysosomal accessory protein 2) (ATPase H(+)-transporting lysosomal-interacting protein 2) (Renin/prorenin receptor)	Atp6ap2 Atp6ip2	2	2	4.85714	39.1	2
K3W4S6	Glycogenin	Gyg	4	4	10.6101	41.9	7
F8VQE9	Arf-GAP with GTPase, ANK repeat and PH domain-containing protein 3	Agap3	1	1	1.20879	97.6	1
P62631	Elongation factor 1-alpha 2 (EF-1-alpha-2) (Eukaryotic elongation factor 1 A-2) (eEF1A-2) (Statin-S1)	Eef1a2 Eef1al Stn	9	2	17.4946	50.4	33
Q61510	E3 ubiquitin/ISG15 ligase TRIM25 (EC 6.3.2.n3) (Estrogen-responsive finger protein) (RING-type E3 ubiquitin transferase) (EC 2.3.2.27) (RING-type E3 ubiquitin transferase TRIM25) (Tripartite motif-containing protein 25) (Ubiquitin/ISG15-conjugating enzyme TRIM25) (Zinc finger protein 147)	Trim25 Efp Zfp147 Znf147	3	3	5.04732	71.7	3
O35632	Hyaluronidase-2 (Hyal-2) (EC 3.2.1.35) (Hyaluronoglucosaminidase-2)	Hyal2	2	2	3.38266	53.6	2
P70158	Acid sphingomyelinase-like phosphodiesterase 3a (ASM-like phosphodiesterase 3a) (EC 3.1.4.-)	Smpdl3a Asml3a	2	2	3.82022	49.8	2
Q9QXD8	LIM domain-containing protein 1	Limd1	2	2	2.69461	71.4	2
F8WGM5	Syntaxin-binding protein 2 (Fragment)	Stxbp2	3	3	4.0404	66.4	3
Q04690	Neurofibromin (Neurofibromatosis-related protein NF-1)	Nf1	1	1	0.351989	319.4	1
Q9CR51	V-type proton ATPase subunit G 1 (V-ATPase subunit G 1) (V-ATPase 13 kDa subunit 1) (Vacuolar proton pump subunit G 1)	Atp6v1g1 Atp6g1	1	1	9.32203	13.7	1
Q9WTS2	Alpha-(1,6)-fucosyltransferase (Alpha1-6FucT) (EC 2.4.1.68) (Fucosyltransferase 8) (GDP-L-Fuc:N-acetyl-beta-D-glucosaminide alpha1,6-fucosyltransferase) (GDP-fucose--glycoprotein fucosyltransferase) (Glycoprotein 6-alpha-L-fucosyltransferase)	Fut8	1	1	2.43478	66.5	1
Q9CXW2	28S ribosomal protein S22, mitochondrial (MRP-S22) (S22mt)	Mrps22 Rpms22	3	3	8.07799	41.2	3
F8VPN7	Dedicator of cytokinesis protein 9	Dock9	5	4	2.46096	241.2	5
A0A0R4J078	UBX domain containing 2, isoform CRA_a (UBX domain-containing protein 4)	Ubxn4 Ubxd2 mCG_20043	1	1	4.1502	56.4	1
Q924C1	Exportin-5 (Exp5) (Ran-binding protein 21)	Xpo5 Kiaa1291 Ranbp21	1	1	0.996678	136.9	1
P63024	Vesicle-associated membrane protein 3 (VAMP-3) (Cellubrevin) (CEB) (Synaptobrevin-3)	Vamp3 Syb3	3	1	38.835	11.5	5
Q91Z40	Gbp6 protein (Guanylate-binding protein 7) (MCG141961, isoform CRA_a)	Gbp7 Gbp6 mCG_141961	2	1	2.97806	72.7	2
A0A0R4J0B5	cDNA sequence BC017158 (cDNA sequence BC017158, isoform CRA_b)	BC017158 mCG_21019	5	5	14.5923	50.5	7
P97326	Cadherin-6 (Kidney cadherin) (K-cadherin)	Cdh6	3	3	3.29114	88.3	3
Q6VVW5	Atrial natriuretic peptide receptor 2 (EC 4.6.1.2) (Atrial natriuretic peptide receptor type B) (ANP-B) (ANPR-B) (NPR-B) (Guanylate cyclase B) (GC-B)	Npr2	6	3	4.68004	117	7
Q9Z277	Tyrosine-protein kinase BAZ1B (EC 2.7.10.2) (Bromodomain adjacent to zinc finger domain protein 1B) (Williams syndrome transcription factor homolog) (Williams-Beuren syndrome chromosomal region 9 protein homolog)	Baz1b Wbscr9 Wstf	4	4	2.09601	170.5	4
Q9Z1G4	V-type proton ATPase 116 kDa subunit a isoform 1 (V-ATPase 116 kDa isoform a1) (Clathrin-coated vesicle/synaptic vesicle proton pump 116 kDa subunit) (Vacuolar adenosine triphosphatase subunit Ac116) (Vacuolar proton pump subunit 1) (Vacuolar proton translocating ATPase 116 kDa subunit a isoform 1)	Atp6v0a1 Atp6n1	5	5	5.95948	96.4	7
O35075	Vacuolar protein sorting-associated protein 26C (Down syndrome critical region protein 3 homolog) (Down syndrome critical region protein A homolog)	Vps26c Dcra Dscr3 Dscra	3	3	12.4579	32.9	4
A0A1Y7VK55	Nuclear factor 1	Nfic	1	1	2.1692	51.3	1
Q61093	Cytochrome b-245 heavy chain (EC 1.-.-.-) (CGD91-phox) (Cytochrome b(558) subunit beta) (Cytochrome b558 subunit beta) (Heme-binding membrane glycoprotein gp91phox) (Neutrophil cytochrome b 91 kDa polypeptide) (gp91-1) (gp91-phox) (p22 phagocyte B-cytochrome)	Cybb Cgd	1	1	1.92982	65.3	1
Q8R3Y8	Interferon regulatory factor 2-binding protein 1 (IRF-2-binding protein 1) (IRF-2BP1) (Probable E3 ubiquitin-protein ligase IRF2BP1) (EC 2.3.2.27) (Probable RING-type E3 ubiquitin transferase IRF2BP1)	Irf2bp1	1	1	1.36986	61.7	1
F6XC15	Filamin-A (Fragment)	Flna	31	1	59.4912	56.3	111
P01636	Ig kappa chain V-V region MOPC 149		2	1	29.6296	12	3
P23188	Furin (EC 3.4.21.75) (Dibasic-processing enzyme) (Paired basic amino acid residue-cleaving enzyme) (PACE) (Prohormone convertase 3)	Furin Fur Pcsk3	1	1	0.882724	86.7	1
Q8QZV7	Integrator complex subunit 13 (Cell cycle regulator Mat89Bb homolog) (Protein asunder homolog) (Spermatogenesis-associated protein 30)	IntS13 Asun Spata30	2	2	2.59563	82.7	2
Q91WB4	Pleckstrin homology domain-containing family F member 2 (PH domain-containing family F member 2)	Plekhf2	1	1	3.61446	27.7	2
Q9ER38	Torsin-3A (ATP-dependent interferon-responsive protein) (Torsin family 3 member A)	Tor3a Adir	1	1	2.85714	43.8	2
P14483	H-2 class II histocompatibility antigen, A beta chain	H2-Ab1 H2-iabeta	2	2	6.41509	30.1	2
Q99KK9	Probable histidine--tRNA ligase, mitochondrial (EC 6.1.1.21) (Histidine--tRNA ligase-like) (Histidyl-tRNA synthetase) (HisRS)	Hars2 Harsl	6	4	11.6832	56.9	6
Q80TL7	Protein MON2 homolog (Protein SF21)	Mon2 Kiaa1040 Sf21	2	2	1.22449	189	2
P60334	Cysteine dioxygenase type 1 (EC 1.13.11.20) (Cysteine dioxygenase type I) (CDO) (CDO-I)	Cdo1	2	1	9.5	23	2
Q9JM98	WD repeat-containing protein WRAP73 (WD repeat-containing protein 8) (WD repeat-containing protein antisense to TP73 gene)	Wrap73 Dd57 Wdr8	1	1	1.7316	52	1
Q8VE99	Coiled-coil domain-containing protein 115 (Coiled-coil protein 1) (Ccp1)	Ccdc115	3	3	19.4444	19.7	3
O78196	H-2 class II histocompatibility antigen, I-A beta chain (Major histocompatibility protein class II beta chain)	H2-Eb1 Btnl2 IEbeta	2	2	6.81818	30.1	2
Q80X85	28S ribosomal protein S7, mitochondrial (MRP-S7) (S7mt)	Mrps7	2	2	7.43802	28	2
Q62312	TGF-beta receptor type-2 (TGFR-2) (EC 2.7.11.30) (TGF-beta type II receptor) (Transforming growth factor-beta receptor type II) (TGF-beta receptor type II) (TbetaR-II)	Tgfbr2	1	1	1.52027	67.1	1
A0A0R4J0T8	ADP-ribosylation factor GTPase-activating protein 3	Arfgap3	2	2	4.77099	57.5	3
Q8BZQ2	Cysteine-rich secretory protein LCCL domain-containing 2 (Coffeecrisp)	Crispld2	2	1	4.24242	55.4	2
Q52KI8	Serine/arginine repetitive matrix protein 1 (Plenty-of-prolines 101)	Srrm1 Pop101	1	1	1.05708	106.8	1
A0A075B5J6	Predicted gene, 20730	Gm20730	1	1	10.9244	13.1	1
P70695	Fructose-1,6-bisphosphatase isozyme 2 (FBPase 2) (EC 3.1.3.11) (D-fructose-1,6-bisphosphate 1-phosphohydrolase 2) (Muscle FBPase) (RAE-30)	Fbp2	3	3	12.0944	36.9	4
P12025	Midkine (MK) (Retanoic acid-responsive protein) (Retinoic acid-induced differentiation factor)	Mdk Mk	1	1	7.14286	15.4	1
Q99M74	Keratin, type II cuticular Hb2 (Keratin-82) (K82) (Type II hair keratin Hb2) (Type-II keratin Kb22)	Krt82 Krt2-20 Krthb2	5	3	6.97674	57.1	8
Q91W39	Nuclear receptor coactivator 5 (NCoA-5) (Coactivator independent of AF-2) (CIA)	Ncoa5	5	5	8.46287	65.3	5
Q9CQN7	39S ribosomal protein L41, mitochondrial (L41mt) (MRP-L41)	Mrpl41	1	1	8.88889	15.3	1
Q8BW96	Calcium/calmodulin-dependent protein kinase type 1D (EC 2.7.11.17) (CaM kinase I delta) (CaM-KI delta) (CaMKI delta) (CaM kinase ID) (CaMKI-like protein kinase) (CKLiK) (mCKLiK)	Camk1d	2	1	3.8961	42.9	2
Q99LR1	Lysophosphatidylserine lipase ABHD12 (EC 3.1.1.-) (2-arachidonoylglycerol hydrolase ABHD12) (Abhydrolase domain-containing protein 12) (Monoacylglycerol lipase ABHD12) (EC 3.1.1.23) (Oxidized phosphatidylserine lipase ABHD12) (EC 3.1.-.-)	Abhd12	4	4	11.809	45.2	4
Q9Z1K6	E3 ubiquitin-protein ligase ARIH2 (ARI-2) (Protein ariadne-2 homolog) (EC 2.3.2.31) (RING-type E3 ubiquitin transferase ARIH2) (Triad1 protein) (UbcM4-interacting protein 48)	Arih2 Ari2 Triad1 Uip48	2	2	5.4878	57.7	2
P97470	Serine/threonine-protein phosphatase 4 catalytic subunit (PP4C) (Pp4) (EC 3.1.3.16) (Protein phosphatase X) (PP-X)	Ppp4c Ppp4 Ppx	3	2	11.4007	35.1	4
Q9EPB4	Apoptosis-associated speck-like protein containing a CARD (mASC) (PYD and CARD domain-containing protein)	Pycard Asc	2	2	8.80829	21.4	4
B7ZNL8	Pseudouridylate synthase 7 homolog (EC 5.4.99.-)	Pus7 Kiaa1897	2	2	3.9039	75.3	2
Q8R2U6	Diphosphoinositol polyphosphate phosphohydrolase 2 (DIPP-2) (EC 3.6.1.52) (Diadenosine 5',5'''-P1,P6-hexaphosphate hydrolase 2) (EC 3.6.1.-) (Nucleoside diphosphate-linked moiety X motif 4) (Nudix motif 4)	Nudt4 Dipp2	4	3	30.7263	20.1	5
Q91VJ4	Serine/threonine-protein kinase 38 (EC 2.7.11.1) (NDR1 protein kinase) (Nuclear Dbf2-related kinase 1)	Stk38 Ndr1	2	2	3.22581	54.1	2
E0CYH0	MCG16685, isoform CRA_d (Pre-mRNA-splicing regulator WTAP)	Wtap mCG_16685	1	1	2.77778	44.2	1
Q64462	Cytochrome P450 4B1 (EC 1.14.14.1) (CYPIVB1)	Cyp4b1	2	2	5.67515	58.9	3
Q66T02	Pleckstrin homology domain-containing family G member 5 (PH domain-containing family G member 5) (Synectin-binding RhoA exchange factor) (SYX)	Plekhg5 Kiaa0720 Syx	1	1	0.652377	118.9	1
P35282	Ras-related protein Rab-21 (Rab-12)	Rab21	4	4	19.8198	24.1	8
Q9D8T7	SRA stem-loop-interacting RNA-binding protein, mitochondrial	Slirp	2	2	14.2857	12.6	3
Q1ERP8	CMRF35-like molecule 9 (CLM-9) (CD300 antigen-like family member G) (Nepmucin) (CD antigen CD300g)	Cd300lg Clm9 D11Ertd736e	2	2	6.34441	36.7	3
A0A0A0MQD7	Ral GTPase-activating protein subunit alpha-2	Ralgapa2	1	1	0.680628	213.9	1
Q9DC29	ATP-binding cassette sub-family B member 6, mitochondrial	Abcb6	2	2	2.96912	93.7	2
Q62192	CD180 antigen (Lymphocyte antigen 78) (Ly-78) (Radioprotective 105 kDa protein) (CD antigen CD180)	Cd180 Ly78 Rp105	1	1	2.118	74.3	1
Q8VC16	Leucine-rich repeat-containing protein 14	Lrrc14 Kiaa0014	1	1	1.82556	54.9	1
Q9QZK2	Breast cancer anti-estrogen resistance protein 3 (p130Cas-binding protein AND-34)	Bcar3 And34	3	3	3.29268	92.2	3
Q8C7J6	Potassium channel tetramerisation domain containing 12b, isoform CRA_a (Potassium channel tetramerisation domain-containing 12b)	Kctd12b mCG_61677	5	2	16.4384	33.3	7
Q9JI44	DNA methyltransferase 1-associated protein 1 (DNMAP1) (DNMT1-associated protein 1) (MAT1-mediated transcriptional repressor)	Dmap1 Mmtr	2	2	3.63248	53.1	2
S4R2K0	Peptide deformylase (EC 3.5.1.88)	Pdf	2	2	16.4502	25.8	2
G3XA59	Transforming growth factor beta activator LRRC32 (Garpin) (Glycoprotein A repetitions predominant) (GARP) (Leucine-rich repeat-containing protein 32)	Lrrc32	1	1	1.80995	72.4	2
A0A1W2P7W3	Protein tyrosine phosphatase, receptor type, B, isoform CRA_b (Receptor-type tyrosine-protein phosphatase beta)	Ptprb mCG_125055	2	1	0.700219	255	2
Q8VBW6	NEDD8-activating enzyme E1 regulatory subunit (Amyloid beta precursor protein-binding protein 1, 59 kDa) (APP-BP1) (Amyloid protein-binding protein 1)	Nae1 Appbp1	2	2	4.11985	60.2	2
Q60967	Bifunctional 3'-phosphoadenosine 5'-phosphosulfate synthase 1 (PAPS synthase 1) (PAPSS 1) (Sulfurylase kinase 1) (SK 1) (SK1) [Includes: Sulfate adenylyltransferase (EC 2.7.7.4) (ATP-sulfurylase) (Sulfate adenylate transferase) (SAT); Adenylyl-sulfate kinase (EC 2.7.1.25) (3'-phosphoadenosine-5'-phosphosulfate synthase) (APS kinase) (Adenosine-5'-phosphosulfate 3'-phosphotransferase) (Adenylylsul…	Papss1 Asapk Atpsk1 Papss	3	2	4.64744	70.7	4
G3X9K3	Brefeldin A-inhibited guanine nucleotide-exchange protein 1 (BIG1) (Brefeldin A-inhibited GEP 1) (ADP-ribosylation factor guanine nucleotide-exchange factor 1)	Arfgef1	3	1	1.30011	208.4	3
Q8CFI0	E3 ubiquitin-protein ligase NEDD4-like (EC 2.3.2.26) (HECT-type E3 ubiquitin transferase NED4L) (NEDD4.2) (Nedd4-2)	Nedd4l Kiaa0439 Nedd4b	7	2	6.2749	115.3	13
G3X9N1	Rho GTPase activating protein 24, isoform CRA_b (Rho GTPase-activating protein 24)	Arhgap24 mCG_141814	1	1	1.87416	84.1	1
E9PYG6	RAS p21 protein activator 1	Rasa1	2	2	2.31214	115.4	2
Q8JZL3	Thiamine-triphosphatase (ThTPase) (EC 3.6.1.28)	Thtpa	2	2	12.0536	24.2	2
Q8C4C9	DnaJ (Hsp40) homolog, subfamily B, member 12, isoform CRA_d (DnaJ homolog subfamily B member 12)	Dnajb12 mCG_11302	1	1	2.91005	42.4	1
P39098	Mannosyl-oligosaccharide 1,2-alpha-mannosidase IB (EC 3.2.1.113) (Mannosidase alpha class 1A member 2) (Processing alpha-1,2-mannosidase IB) (Alpha-1,2-mannosidase IB)	Man1a2 Man1b	1	1	1.71607	72.8	1
Q920A7	AFG3-like protein 1 (EC 3.4.24.-)	Afg3l1	5	3	5.57668	87	7
Q811S7	Upstream-binding protein 1 (Nuclear factor 2d9) (NF2d9)	Ubp1 Cp2b Nf2d9	2	2	4.07407	60.2	4
Q9CWU9	Nucleoporin Nup37 (Nup107-160 subcomplex subunit Nup37)	Nup37	1	1	4.29448	36.7	1
Q0VG49	Uncharacterized protein C15orf61 homolog		1	1	4.4586	18	1
Q6R891	Neurabin-2 (Neurabin-II) (Protein phosphatase 1 regulatory subunit 9B) (Spinophilin)	Ppp1r9b	3	3	3.91677	89.5	4
P05784	Keratin, type I cytoskeletal 18 (Cytokeratin endo B) (Keratin D) (Cytokeratin-18) (CK-18) (Keratin-18) (K18)	Krt18 Kerd Krt1-18	4	1	8.51064	47.5	8
Q3TMP1	General transcription factor IIIC, polypeptide 3	Gtf3c3 AL022818	1	1	1.36054	100.6	1
Q8BWG9	Calcium release-activated calcium channel protein 1 (Protein orai-1) (Transmembrane protein 142A)	Orai1 Cracm1 Tmem142a	2	2	6.90789	33	2
P03899	NADH-ubiquinone oxidoreductase chain 3 (EC 7.1.1.2) (NADH dehydrogenase subunit 3)	Mtnd3 mt-Nd3 Nd3	1	1	13.0435	13.2	1
Q9DCL2	Cytosolic iron-sulfur assembly component 2A (MIP18 family protein FAM96A)	Ciao2a Fam96a	1	1	6.875	18.4	1
O89016	ATP-binding cassette sub-family D member 4 (PMP70-related protein) (P70R) (Peroxisomal membrane protein 1-like) (PXMP1-L) (Peroxisomal membrane protein 69) (PMP69)	Abcd4 Pxmp1l	2	2	3.46535	68.5	2
Q99J36	THUMP domain-containing protein 1	Thumpd1	1	1	3.14286	38.9	1
Q91VH6	Protein MEMO1 (Mediator of ErbB2-driven cell motility 1) (Memo-1)	Memo1	3	3	12.7946	33.7	4
O55125	Protein NipSnap homolog 1 (NipSnap1)	Nipsnap1	2	2	8.09859	33.3	3
P54923	[Protein ADP-ribosylarginine] hydrolase (ADP-ribosylarginine hydrolase) (EC 3.2.2.19) (ADP-ribose-L-arginine cleaving enzyme)	Adprh Arh1	2	2	4.41989	40	2
P97792	Coxsackievirus and adenovirus receptor homolog (CAR) (mCAR)	Cxadr Car	1	1	2.46575	39.9	1
Q8C7E9	Cleavage stimulation factor subunit 2 tau variant (CF-1 64 kDa subunit tau variant) (Cleavage stimulation factor 64 kDa subunit tau variant) (CSTF 64 kDa subunit tau variant) (TauCstF-64)	Cstf2t Kiaa0689	2	1	3.63924	65.8	2
A6H8H2	DENN domain-containing protein 4C	Dennd4c	4	4	2.83316	211.3	4
Q8BTW3	Exosome complex component MTR3 (Exosome component 6) (mRNA transport regulator 3 homolog)	Exosc6 Mtr3	4	4	15.3846	28.4	5
Q99L85	Elongator complex protein 5 (Dermal papilla-derived protein 6 homolog) (Retinoic acid-induced protein 12)	Elp5 Derp6 Rai12	1	1	2.66667	33.5	1
P59913	Protein-L-isoaspartate O-methyltransferase domain-containing protein 1	Pcmtd1	1	1	2.52101	40.7	1
P08730	Keratin, type I cytoskeletal 13 (47 kDa cytokeratin) (Cytokeratin-13) (CK-13) (Keratin-13) (K13)	Krt13 Krt1-13	6	1	9.61098	47.7	10
P63280	SUMO-conjugating enzyme UBC9 (EC 2.3.2.-) (RING-type E3 SUMO transferase UBC9) (SUMO-protein ligase) (Ubiquitin carrier protein 9) (mUBC9) (Ubiquitin carrier protein I) (Ubiquitin-conjugating enzyme E2 I) (Ubiquitin-protein ligase I)	Ube2i Ubc9 Ubce2i Ubce9	1	1	11.3924	18	1
O08759	Ubiquitin-protein ligase E3A (EC 2.3.2.26) (HECT-type ubiquitin transferase E3A) (Oncogenic protein-associated protein E6-AP)	Ube3a	4	4	5.51724	99.8	4
A2AB59	Rho GTPase-activating protein 27 (CIN85-associated multi-domain-containing Rho GTPase-activating protein 1) (Rho-type GTPase-activating protein 27)	Arhgap27 Camgap1	1	1	1.03567	97	1
J3QN94	Tripartite motif-containing protein 26	Trim26	1	1	2.01835	62.7	1
A0A1W2P750	Protein phosphatase 1 regulatory subunit 12A (Fragment)	Ppp1r12a	28	1	44.0711	57.9	44
Q9CYI0	Protein Njmu-R1		2	2	3.56234	44.4	2
A0A286YD87	Growth arrest-specific protein 1	Gas1	4	4	15.625	40.4	5
Q8BZX4	Splicing regulatory glutamine/lysine-rich protein 1 (Serine/arginine-rich-splicing regulatory protein 86) (SRrp86) (Splicing factor, arginine/serine-rich 12)	Srek1 Sfrs12 Srrp86	2	2	4.8583	56.7	2
P26952	Interleukin-3 receptor subunit alpha (IL-3 receptor subunit alpha) (IL-3R subunit alpha) (IL-3R-alpha) (IL-3RA) (Interleukin-3 receptor class II alpha chain) (CD antigen CD123)	Il3ra Sut-1	1	1	3.0303	43.2	2
O88630	Golgi SNAP receptor complex member 1 (28 kDa Golgi SNARE protein) (28 kDa cis-Golgi SNARE p28) (GOS-28)	Gosr1 Gs28	1	1	2.8	28.5	1
Q3UGS4	Mapk-regulated corepressor-interacting protein 1 (Protein FAM195B)	Mcrip1 Fam195b	2	2	29.8969	11.1	3
Q8BNL5	BTB/POZ domain-containing protein KCTD6	Kctd6	1	1	4.64135	27.6	1
Q923F1	Chloride channel, nucleotide-sensitive, 1A (Chloride channel, nucleotide-sensitive, 1A, isoform CRA_b) (Methylosome subunit pICln)	Clns1a mCG_7058	1	1	5.39419	26.5	2
Q8BMI3	ADP-ribosylation factor-binding protein GGA3 (Golgi-localized, gamma ear-containing, ARF-binding protein 3)	Gga3 Kiaa0154	2	1	1.94986	77.9	2
Q64151	Semaphorin-4C (M-Sema F) (Semaphorin-C-like 1) (Sema I) (Semaphorin I)	Sema4c S4c Semacl1 Semai	2	2	1.67866	92.5	2
Q921I9	Exosome complex component RRP41 (Exosome component 4) (Ribosomal RNA-processing protein 41)	Exosc4 Rrp41	2	2	9.38776	26.2	2
Q8VCF0	Mitochondrial antiviral-signaling protein (MAVS) (CARD adapter inducing interferon beta) (Cardif) (Interferon beta promoter stimulator protein 1) (IPS-1) (Virus-induced-signaling adapter) (VISA)	Mavs Ips1 Visa	5	5	13.1213	53.4	6
Q6ZPE2	Myotubularin-related protein 5 (Inactive phosphatidylinositol 3-phosphatase 5) (SET-binding factor 1) (Sbf1)	Sbf1 Kiaa3020 Mtmr5	4	4	2.03535	208.6	4
A0A1D5RLQ9	Non-specific serine/threonine protein kinase (EC 2.7.11.1)	Cdc42bpa	9	4	4.74828	198.5	11
Q71FD5	E3 ubiquitin-protein ligase ZNRF2 (EC 2.3.2.27) (RING-type E3 ubiquitin transferase ZNRF2) (Zinc/RING finger protein 2)	Znrf2	2	2	5.88235	23.7	2
Q8BU31	Ras-related protein Rap-2c	Rap2c	3	2	18.5792	20.7	3
B1AVP0	Phosphatase and actin regulator	Phactr2	1	1	2.05696	69.2	1
Q91W98	Solute carrier family 15 member 4 (Peptide transporter 4) (Peptide/histidine transporter 1)	Slc15a4	1	1	1.56794	62.2	1
Q91WC0	Actin-histidine N-methyltransferase (EC 2.1.1.85) (Endothelial differentiation inhibitory protein D10) (SET domain-containing protein 3)	Setd3 D12Ertd771e	3	3	6.56566	67.1	5
P01819	Ig heavy chain V region MOPC 141		1	1	7.63889	15.7	1
Q923E4	NAD-dependent protein deacetylase sirtuin-1 (EC 3.5.1.-) (Regulatory protein SIR2 homolog 1) (SIR2-like protein 1) (SIR2alpha) (Sir2) (mSIR2a) [Cleaved into: SirtT1 75 kDa fragment (75SirT1)]	Sirt1 Sir2l1	1	1	1.49254	80.3	1
Q64191	N(4)-(beta-N-acetylglucosaminyl)-L-asparaginase (EC 3.5.1.26) (Aspartylglucosaminidase) (AGA) (Glycosylasparaginase) (N4-(N-acetyl-beta-glucosaminyl)-L-asparagine amidase) [Cleaved into: Glycosylasparaginase alpha chain; Glycosylasparaginase beta chain]	Aga	2	2	6.06936	37	3
Q5U5M8	Biogenesis of lysosome-related organelles complex 1 subunit 3 (BLOC-1 subunit 3) (Reduced pigmentation protein)	Bloc1s3 Blos3 Rp	1	1	7.17949	20.4	1
P08607	C4b-binding protein (C4bp)	C4bpa C4bp	3	3	6.39659	51.5	4
Q80Y81	Zinc phosphodiesterase ELAC protein 2 (EC 3.1.26.11) (ElaC homolog protein 2) (Ribonuclease Z 2) (RNase Z 2) (tRNA 3 endonuclease 2) (tRNase Z 2)	Elac2	2	2	2.88809	92.7	2
Q9CZR3	Mitochondrial import receptor subunit TOM40B (Protein TOMM40-like)	Tomm40l Tomm40b	1	1	4.87013	34	1
Q9D0L8	mRNA cap guanine-N7 methyltransferase (EC 2.1.1.56) (RG7MT1) (mRNA (guanine-N(7)-)-methyltransferase) (mRNA cap methyltransferase)	Rnmt Kiaa0398	1	1	4.08602	53.3	1
Q9CZP0	Ufm1-specific protease 1 (UfSP1) (EC 3.4.22.-)	Ufsp1 D5Ertd655e	2	2	7.37327	23.4	2
Q8BW41	Protein O-linked-mannose beta-1,4-N-acetylglucosaminyltransferase 2 (POMGnT2) (EC 2.4.1.312) (Extracellular O-linked N-acetylglucosamine transferase-like) (Glycosyltransferase-like domain-containing protein 2)	Pomgnt2 Ago61 Eogtl Gtdc2	1	1	1.98347	69.3	1
Q9QYJ3	DnaJ homolog subfamily B member 1 (Heat shock 40 kDa protein 1) (HSP40) (Heat shock protein 40)	Dnajb1 Hsp40 Hspf1	3	3	7.64706	38.1	3
Q8BLF1	Neutral cholesterol ester hydrolase 1 (NCEH) (EC 3.1.1.-) (Arylacetamide deacetylase-like 1) (Chlorpyrifos oxon-binding protein) (CPO-BP)	Nceh1 Aadacl1 Kiaa1363	1	1	3.92157	45.7	1
Q91YS4	Kinesin light chain 2 (Klc2 protein)	Klc2 mCG_8395	4	1	6.13893	68.4	5
Q99P87	Resistin (Adipose tissue-specific secretory factor) (ADSF) (Adipose-specific cysteine-rich secreted protein A12-alpha) (Cysteine-rich secreted protein FIZZ3)	Retn Fizz3	1	1	7.01754	12.5	1
Q9QYK7	RING finger protein 11 (NEDD4 WW domain-binding protein 2) (Sid 1669)	Rnf11 N4wbp2 Sid1669	1	1	7.79221	17.4	1
O35488	Very long-chain acyl-CoA synthetase (VLACS) (VLCS) (EC 6.2.1.-) (Fatty acid transport protein 2) (FATP-2) (Fatty-acid-coenzyme A ligase, very long-chain 1) (Long-chain-fatty-acid--CoA ligase) (EC 6.2.1.3) (Solute carrier family 27 member 2) (THCA-CoA ligase) (Very long-chain-fatty-acid-CoA ligase)	Slc27a2 Acsvl1 Facvl1 Fatp2 Vlacs Vlcs	6	6	10.1613	70.4	6
E9Q7D5	Rho guanine nucleotide exchange factor 5	Arhgef5	1	1	0.506009	176.6	1
Q91YL3	Uridine-cytidine kinase-like 1 (EC 2.7.1.48)	Uckl1 Urkl1	1	1	1.82482	60.8	2
Q9Z329	Inositol 1,4,5-trisphosphate receptor type 2 (IP3 receptor isoform 2) (IP3R 2) (InsP3R2) (Inositol 1,4,5-trisphosphate type V receptor) (Type 2 inositol 1,4,5-trisphosphate receptor) (Type 2 InsP3 receptor)	Itpr2 Itpr5	4	1	1.03665	307.3	6
Q8K2C8	Glycerol-3-phosphate acyltransferase 4 (GPAT4) (EC 2.3.1.15) (1-acylglycerol-3-phosphate O-acyltransferase 6) (1-AGP acyltransferase 6) (1-AGPAT 6) (Acyl-CoA:glycerol-3-phosphate acyltransferase 4) (Lysophosphatidic acid acyltransferase zeta) (LPAAT-zeta) (Testis spermatogenesis apoptosis-related protein 7)	Gpat4 Agpat6 Tsarg7	2	2	5.04386	52.1	2
E9PVD3	Protocadherin-16 (Protein Dchs1) (Protein dachsous homolog 1)	Dchs1	1	1	0.395017	346.2	1
E0CZ22	Maestro heat-like repeat family member 1	Mroh1 Heatr7a	1	1	0.670732	181.7	2
Q3U2P1	Protein transport protein Sec24A (SEC24-related protein A)	Sec24a	3	3	3.48624	118.7	4
Q61112	45 kDa calcium-binding protein (Cab45) (Stromal cell-derived factor 4) (SDF-4)	Sdf4 Cab45	1	1	2.77008	42	1
Q8VDS8	Syntaxin-18	Stx18	2	2	5.98802	38.4	3
E9Q8N8	Anion exchange protein	Slc4a4	1	1	0.639854	123	1
A2AQC3	Phospholipid-transporting ATPase (EC 7.6.2.1)	Atp9a	1	1	0.723982	124.4	1
B1AQ75	Keratin, type I cuticular Ha6 (Keratin-36) (K36) (Keratin-5) (MHRa-1) (Type I keratin 48 kDa)	Krt36 Hra-1 Krt1-22 Krt1-5	4	1	6.97674	52.8	5
A0A0A0MQN9	Tetratricopeptide repeat protein 28	Ttc28	2	2	0.76582	270.6	2
O88958	Glucosamine-6-phosphate isomerase 1 (EC 3.5.99.6) (Glucosamine-6-phosphate deaminase 1) (GNPDA 1) (GlcN6P deaminase 1) (Oscillin)	Gnpda1 Gnpi	2	2	6.92042	32.5	2
P62305	Small nuclear ribonucleoprotein E (snRNP-E) (Sm protein E) (Sm-E) (SmE)	Snrpe	2	2	25	10.8	3
A0A1Y7VM56	NAD-dependent protein deacylase sirtuin-5, mitochondrial (EC 3.5.1.-) (Regulatory protein SIR2 homolog 5) (SIR2-like protein 5)	Sirt5 SIRT5	4	4	14.8571	38.2	5
Q00422	GA-binding protein alpha chain (GABP subunit alpha)	Gabpa E4tf1a	2	2	4.84581	51.3	2
Q9D6Y1	Coiled-coil domain-containing protein 3 (Fat/vessel-derived secretory protein) (Favine)	Ccdc3	2	2	6.59341	31.1	2
Q61009	Scavenger receptor class B member 1 (SRB1) (SR-BI)	Scarb1 Srb1	2	2	2.94695	56.7	2
Q4PZA2	Endothelin-converting enzyme 1 (ECE-1) (EC 3.4.24.71)	Ece1	1	1	1.04031	87	1
Q9CQS4	Solute carrier family 25 member 46	Slc25a46	3	3	10.5263	46.2	3
Q924M7	Mannose-6-phosphate isomerase (EC 5.3.1.8) (Phosphohexomutase) (Phosphomannose isomerase) (PMI)	Mpi Mpi1 Pmi	4	4	14.4208	46.5	4
Q91WF7	Polyphosphoinositide phosphatase (EC 3.1.3.-) (Phosphatidylinositol 3,5-bisphosphate 5-phosphatase) (SAC domain-containing protein 3)	Fig4 Kiaa0274 Sac3	3	3	2.53583	103.4	3
Q99LJ1	Tissue alpha-L-fucosidase (EC 3.2.1.51) (Alpha-L-fucosidase I) (Alpha-L-fucoside fucohydrolase 1) (Alpha-L-fucosidase 1)	Fuca1 Fuca	2	2	3.76106	52.2	2
F8VQD7	Receptor-type tyrosine-protein phosphatase gamma	Ptprg	2	2	1.45631	161.2	2
Q3V4B5	COMM domain-containing protein 6	Commd6	1	1	12.6437	9.8	1
Q3TRM8	Hexokinase-3 (EC 2.7.1.1) (Hexokinase type III) (HK III)	Hk3	3	1	3.90456	100	5
Q64282	Interferon-induced protein with tetratricopeptide repeats 1 (IFIT-1) (Glucocorticoid-attenuated response gene 16 protein) (GARG-16) (Interferon-induced 56 kDa protein) (IFI-56K) (P56)	Ifit1 Garg16 Ifi56 Isg56	1	1	3.88769	53.7	1
Q61765	Keratin, type I cuticular Ha1 (HKA-1) (Hair keratin, type I Ha1) (Keratin-31) (K31)	Krt31 Hka1 Krt1-1 Krtha1	11	1	26.4423	47.1	15
Q9WVT6	Carbonic anhydrase 14 (EC 4.2.1.1) (Carbonate dehydratase XIV) (Carbonic anhydrase XIV) (CA-XIV)	Ca14 Car14 Catm	1	1	3.56083	37.5	1
P02463	Collagen alpha-1(IV) chain [Cleaved into: Arresten]	Col4a1	4	2	3.41522	160.6	9
F6XJP7	Proprotein convertase subtilisin/kexin type 6	Pcsk6	3	2	3.44108	106	3
A0A0A6YYE7	Immunoglobulin kappa variable 4-57 (Fragment)	Igkv4-57	1	1	11.9658	12.7	1
Q06180	Tyrosine-protein phosphatase non-receptor type 2 (Protein-tyrosine phosphatase PTP-2) (EC 3.1.3.48) (MPTP)	Ptpn2 Ptpt	2	2	4.92611	47.3	2
Q5XJY4	Presenilins-associated rhomboid-like protein, mitochondrial (EC 3.4.21.105) (Mitochondrial intramembrane-cleaving protease PARL) [Cleaved into: P-beta (Pbeta)]	Parl Psarl	4	4	12.4668	41.9	4
Q9CQ22	Ragulator complex protein LAMTOR1 (Late endosomal/lysosomal adaptor and MAPK and MTOR activator 1) (Lipid raft adaptor protein p18)	Lamtor1	1	1	6.8323	17.7	1
Q8BTV2	Cleavage and polyadenylation specificity factor subunit 7	Cpsf7	2	2	5.09554	52	3
Q80W54	CAAX prenyl protease 1 homolog (EC 3.4.24.84) (Farnesylated proteins-converting enzyme 1) (FACE-1) (Prenyl protein-specific endoprotease 1) (Zinc metalloproteinase Ste24 homolog)	Zmpste24 Face1	2	2	5.05263	54.7	3
Q9JHZ2	Progressive ankylosis protein (Fn54 protein)	Ankh Ank	1	1	2.43902	54.3	1
A0A0R4J040	Bifunctional apoptosis regulator	Bfar	1	1	2.66667	52.9	2
Q3UYV9	Nuclear cap-binding protein subunit 1 (80 kDa nuclear cap-binding protein) (CBP80) (NCBP 80 kDa subunit)	Ncbp1 Cbp80	2	2	3.16456	91.9	2
Q04750	DNA topoisomerase 1 (EC 5.6.2.2) (DNA topoisomerase I)	Top1 Top-1	2	2	2.21643	90.8	2
Q8C1F4	Chondroitin sulfate N-acetylgalactosaminyltransferase 2 (EC 2.4.1.174) (Chondroitin beta-1,4-N-acetylgalactosaminyltransferase 2) (Beta4GalNAcT-2) (GalNAcT-2)	Csgalnact2 Chgn2 Galnact2	4	3	7.19557	62.5	5
Q9JIZ9	Phospholipid scramblase 3 (PL scramblase 3) (Ca(2+)-dependent phospholipid scramblase 3)	Plscr3	1	1	6.41892	31.8	1
Z4YJY0	BRISC complex subunit Abraxas 2	Abraxas2	3	3	5.89623	47.9	3
A0A0G2JGK2	Immunoglobulin heavy variable V1-74 (Fragment)	Ighv1-74	2	1	16.2393	12.9	2
A0A0A6YXZ4	Immunoglobulin heavy variable 1-62-2 (Fragment)	Ighv1-62-2	3	2	26.0504	13.4	5
Q9CWV0	Mitochondrial assembly of ribosomal large subunit protein 1	Malsu1	1	1	3.07018	26	1
P08508	Low affinity immunoglobulin gamma Fc region receptor III (IgG Fc receptor III) (Fc-gamma RIII) (FcRIII) (CD antigen CD16)	Fcgr3	3	3	10.728	30	3
Q9DCN1	Peroxisomal NADH pyrophosphatase NUDT12 (EC 3.6.1.22) (Nucleoside diphosphate-linked moiety X motif 12) (Nudix motif 12)	Nudt12	1	1	1.94805	51.5	1
Q8BGF0	Expressed sequence AW551984	AW551984	3	1	3.85572	89.4	3
O35250	Exocyst complex component 7 (Exocyst complex component Exo70)	Exoc7 Exo70	2	2	3.44333	79.9	2
A8DIL0	Galectin	Lgals8	2	2	6.76923	37	2
A0A1Y7VLG4	Rab GDP dissociation inhibitor (Fragment)	Gdi2	6	2	65.3846	11.5	12
A0A0N4SUQ4	Predicted gene 9780	Gm9780	1	1	10.1852	11.3	2
Q8CA71	Protein shisa-4 (Transmembrane protein 58)	Shisa4 Tmem58	1	1	4.56853	21.5	1
A2AGT5	Cytoskeleton-associated protein 5	Ckap5	5	5	2.16535	225.5	5
P61965	WD repeat-containing protein 5 (BMP2-induced 3-kb gene protein) (WD repeat-containing protein BIG-3)	Wdr5 Big Big3	2	2	7.78443	36.6	4
Q8BGN3	Ectonucleotide pyrophosphatase/phosphodiesterase family member 6 (E-NPP 6) (NPP-6) (EC 3.1.4.-) (EC 3.1.4.38) (Choline-specific glycerophosphodiester phosphodiesterase) (Glycerophosphocholine cholinephosphodiesterase) (GPC-Cpde)	Enpp6	1	1	3.63636	50.6	1
Q5F293	Zinc finger and BTB domain-containing protein 4	Zbtb4 Kiaa1538	1	1	0.916497	102.6	1
Q9DD03	Ras-related protein Rab-13	Rab13	4	1	17.3267	22.8	7
Q3U1V6	Ubiquitin-conjugating enzyme E2 variant 3 (UEV-3) (EV and lactate/malate dehydrogenase domain-containing protein)	Uevld Attp Uev3	3	2	6.15711	51.6	3
F8VPU2	FERM, ARHGEF and pleckstrin domain-containing protein 1 (FERM, RhoGEF and pleckstrin domain-containing protein 1)	Farp1	1	1	0.763359	118.8	1
Q69ZF3	Non-lysosomal glucosylceramidase (NLGase) (EC 3.2.1.45) (Beta-glucocerebrosidase 2) (Beta-glucosidase 2) (Bile acid beta-glucosidase GBA2) (Bile acid glucosyl transferase GBA2) (Cholesterol glucosyltransferase GBA2) (EC 2.4.1.-) (Cholesteryl-beta-glucosidase GBA2) (EC 3.2.1.104) (Glucosylceramidase 2)	Gba2 Kiaa1605	1	1	1.08932	103.2	1
Q9D020	Cytosolic 5'-nucleotidase 3A (EC 3.1.3.5) (7-methylguanosine phosphate-specific 5'-nucleotidase) (7-methylguanosine nucleotidase) (EC 3.1.3.91) (Cytosolic 5'-nucleotidase 3) (Cytosolic 5'-nucleotidase III) (cN-III) (Lupin) (Pyrimidine 5'-nucleotidase 1) (P5'N-1) (P5N-1) (PN-I)	Nt5c3a Nt5c3	4	4	12.9909	37.2	4
E9QLK3	BRCA1-associated ATM activator 1	Brat1 Baat1	1	1	1.38408	93.8	1
Q9CRD4	Dysbindin domain-containing protein 2	Dbndd2 D2Bwg0891e	1	1	7.59494	17.2	1
Q8C3I8	Protein HGH1 homolog	Hgh1 Brp16 Fam203a MNCb-5873	1	1	3.05344	42.9	1
O35099	Mitogen-activated protein kinase kinase kinase 5 (EC 2.7.11.25) (Apoptosis signal-regulating kinase 1) (ASK-1) (MAPK/ERK kinase kinase 5) (MEK kinase 5) (MEKK 5)	Map3k5 Ask1 Mekk5	3	3	1.66667	154.4	3
P48024	Eukaryotic translation initiation factor 1 (eIF1) (Protein translation factor SUI1 homolog)	Eif1 Sui1 Sui1-rs1	1	1	14.1593	12.7	1
Q9R1Q9	V-type proton ATPase subunit S1 (V-ATPase subunit S1) (Protein C7-1) (V-ATPase Ac45 subunit) (V-ATPase S1 accessory protein) (Vacuolar proton pump subunit S1)	Atp6ap1 Atp6ip1 Atp6s1	2	2	6.04752	51	2
Q8QZZ7	EKC/KEOPS complex subunit Tprkb (PRPK-binding protein) (TP53RK-binding protein)	Tprkb	1	1	6.28571	19.5	1
A0A087WQ31	CLIP-associating protein 1	Clasp1	5	5	3.54381	170.9	6
E9Q411	Neuroblastoma-amplified sequence	Nbas	4	4	1.86757	265.6	5
A0A0R4IZW5	Cadherin 1, isoform CRA_b (Cadherin-1)	Cdh1 mCG_20483	1	1	1.0181	98.2	1
G5E8U5	28S ribosomal protein S10, mitochondrial (Mitochondrial ribosomal protein S10, isoform CRA_c)	Mrps10 mCG_15571	2	2	8.95522	22.8	2
Q9QZS0	Collagen alpha-3(IV) chain [Cleaved into: Tumstatin]	Col4a3	2	1	0.898742	161.6	2
E9QLB8	Atypical kinase COQ8B, mitochondrial	Coq8b Adck4	1	1	1.68856	59.1	1
Q5SSH8	Neuferricin (Cytochrome b5 domain-containing protein 2)	Cyb5d2	1	1	4.94297	29.1	1
O55239	Nicotinamide N-methyltransferase (EC 2.1.1.1)	Nnmt	1	1	3.40909	29.6	1
Q9D1H7	Golgi to ER traffic protein 4 homolog	Get4	2	2	7.03364	36.5	2
Q6P2L7	Protein CASC4 (Cancer susceptibility candidate gene 4 protein homolog)	Casc4	3	3	5.51724	49.4	3
Q8C3X4	Translation factor Guf1, mitochondrial (EC 3.6.5.-) (Elongation factor 4 homolog) (EF-4) (GTPase Guf1) (Ribosomal back-translocase)	Guf1	1	1	2.30415	72.4	1
G3UX33	Sorting nexin-14	Snx14	1	1	0.822199	112.8	1
Q91X84	CREB-regulated transcription coactivator 3 (Transducer of regulated cAMP response element-binding protein 3) (TORC-3) (Transducer of CREB protein 3)	Crtc3 Torc3	2	2	3.55412	67	2
Q63850	Nuclear pore glycoprotein p62 (62 kDa nucleoporin) (Nucleoporin Nup62)	Nup62	3	3	6.65399	53.2	3
A0A0R4J137	Phytanoyl-CoA dioxygenase domain-containing protein 1	Phyhd1	1	1	4.82315	34.6	2
Q9DBW3	Protein NATD1 (Gene trap locus protein F3-2) (Gene trap locus protein F3b) (N-acetyltransferase domain-containing protein 1)	Natd1 Gm16515 Gtlf3b	1	1	12.7273	12.7	1
Q9CZL2	Uncharacterized protein FAM241A	Fam241a	1	1	8.39695	14.5	1
P32883	GTPase KRas (K-Ras 2) (Ki-Ras) (c-K-ras) (c-Ki-ras) [Cleaved into: GTPase KRas, N-terminally processed]	Kras Kras2	5	3	28.5714	21.6	5
Q8K221	Arfaptin-2 (ADP-ribosylation factor-interacting protein 2)	Arfip2	1	1	3.22581	37.7	1
Q8BH51	Cytochrome c oxidase assembly protein COX14	Cox14	1	1	12.2807	6.4	1
Q9JM13	Rab5 GDP/GTP exchange factor (Rabex-5)	Rabgef1 Rabex5	2	2	4.07332	56.8	2
Q8R1K4	5-phosphohydroxy-L-lysine phospho-lyase (EC 4.2.3.134) (Alanine--glyoxylate aminotransferase 2-like 2)	Phykpl Agxt2l2	1	1	2.78373	51.9	2
A0A0R4J0G6	Glutaminyl-peptide cyclotransferase	Qpct	3	3	10.221	41.1	3
B2RSU6	Cingulin-like 1 (Cingulin-like protein 1)	Cgnl1	3	3	2.15883	148.1	3
A0A140LJJ5	A-kinase anchor protein 13	Akap13	2	2	0.608447	305.8	2
Q9R1Q7	Proteolipid protein 2	Plp2	2	2	17.7632	16.6	10
Q8R5H1	Ubiquitin carboxyl-terminal hydrolase 15 (EC 3.4.19.12) (Deubiquitinating enzyme 15) (Ubiquitin thioesterase 15) (Ubiquitin-specific-processing protease 15)	Usp15 Kiaa0529	4	4	3.66972	112.3	6
Q99M31	Heat shock 70 kDa protein 14 (NST-1) (hsr.1)	Hspa14 Hsp70-4	1	1	1.76817	54.6	1
Q9D1D1	Tetraspanin-11 (Tspan-11)	Tspan11	1	1	3.95257	28.1	1
Q91W29	Cytochrome c oxidase subunit 4 isoform 2, mitochondrial (Cytochrome c oxidase subunit IV isoform 2) (COX IV-2)	Cox4i2 Cox4b	1	1	6.39535	20.2	1
Q3UZA1	CapZ-interacting protein (Protein kinase substrate CapZIP)	Rcsd1 Capzip	6	6	16.0194	44.1	7
Q9QXX4	Calcium-binding mitochondrial carrier protein Aralar2 (Citrin) (Mitochondrial aspartate glutamate carrier 2) (Solute carrier family 25 member 13)	Slc25a13 Aralar2	4	1	5.47337	74.4	6
A0A0A6YXM5	REST corepressor 3	Rcor3	1	1	1.45191	60.9	1
Q80WW9	DDRGK domain-containing protein 1 (UFM1-binding and PCI domain-containing protein 1)	Ddrgk1 Ufbp1	4	4	13.3333	36	6
Q8JZV7	N-acetylglucosamine-6-phosphate deacetylase (GlcNAc 6-P deacetylase) (EC 3.5.1.25) (Amidohydrolase domain-containing protein 2)	Amdhd2	3	3	8.55746	43.5	3
Q9QXE0	2-hydroxyacyl-CoA lyase 1 (EC 4.1.-.-) (2-hydroxyphytanoyl-CoA lyase) (2-HPCL) (Phytanoyl-CoA 2-hydroxylase 2)	Hacl1 Hpcl Phyh2	3	3	7.22892	63.6	4
Q3TFD2	Lysophosphatidylcholine acyltransferase 1 (LPC acyltransferase 1) (LPCAT-1) (LysoPC acyltransferase 1) (mLPCAT1) (EC 2.3.1.23) (1-acylglycerophosphocholine O-acyltransferase) (1-alkylglycerophosphocholine O-acetyltransferase) (EC 2.3.1.67) (Acetyl-CoA:lyso-platelet-activating factor acetyltransferase) (Acetyl-CoA:lyso-PAF acetyltransferase) (Lyso-PAF acetyltransferase) (LysoPAFAT) (Acyltransferas…	Lpcat1 Aytl2	1	1	1.49813	59.7	1
Q8CHQ0	F-box only protein 4	Fbxo4 Fbx4	2	2	4.93506	43.7	2
Q69ZR2	E3 ubiquitin-protein ligase HECTD1 (EC 2.3.2.26) (HECT domain-containing protein 1) (HECT-type E3 ubiquitin transferase HECTD1) (Protein open mind)	Hectd1 Kiaa1131 Opm	6	6	2.44461	289.9	6
Q91W96	Anaphase-promoting complex subunit 4 (APC4) (Cyclosome subunit 4)	Anapc4 D5Ertd249e	2	2	3.34572	91.6	3
E9Q7M2	TSC22 domain family, member 2	Tsc22d2	2	1	2.08062	78.1	3
P54763	Ephrin type-B receptor 2 (EC 2.7.10.1) (Neural kinase) (Nuk receptor tyrosine kinase) (Tyrosine-protein kinase receptor EPH-3) (Tyrosine-protein kinase receptor SEK-3) [Cleaved into: EphB2/CTF1; EphB2/CTF2]	Ephb2 Epth3 Nuk Sek3	1	1	1.21704	109.8	1
Q61160	FAS-associated death domain protein (FAS-associating death domain-containing protein) (Mediator of receptor induced toxicity) (Protein FADD)	Fadd Mort1	2	2	6.34146	22.9	3
Q8BUL6	Pleckstrin homology domain-containing family A member 1 (PH domain-containing family A member 1) (Tandem PH domain-containing protein 1) (TAPP-1)	Plekha1 Tapp1	1	1	2.87206	43.3	1
Q8C6G8	WD repeat-containing protein 26	Wdr26	2	2	3.12012	70.5	2
Q8BIQ5	Cleavage stimulation factor subunit 2 (CF-1 64 kDa subunit) (Cleavage stimulation factor 64 kDa subunit) (CSTF 64 kDa subunit) (CstF-64)	Cstf2	2	1	4.82759	61.3	2
Q99KG3	RNA-binding protein 10 (RNA-binding motif protein 10)	Rbm10 Kiaa0122	2	2	2.15054	103.4	2
A2AHK0	Diacylglycerol kinase (DAG kinase) (EC 2.7.1.107)	Dgkz mCG_130421	1	1	0.712378	125	1
B2KF52	Protein ILRUN	Ilrun D17Wsu92e	1	1	3.05085	32.2	1
E9QP56	Apolipoprotein C-III	Apoc3	3	3	33.5766	15.2	8
Q8BQ47	Protein canopy homolog 4 (Protein associated with Tlr4)	Cnpy4 Prat4b	2	2	8.97959	28.1	2
Q8C050	Ribosomal protein S6 kinase alpha-5 (S6K-alpha-5) (EC 2.7.11.1) (90 kDa ribosomal protein S6 kinase 5) (Nuclear mitogen- and stress-activated protein kinase 1) (RSK-like protein kinase) (RLSK)	Rps6ka5 Msk1	1	1	0.811124	96.5	1
Q8C405	Nuclear autoantigen Sp-100	Sp100	3	3	4.39932	68.1	3
Q3U0V2	Tumor necrosis factor receptor type 1-associated DEATH domain protein (TNFR1-associated DEATH domain protein) (TNFRSF1A-associated via death domain)	Tradd	1	1	3.87097	34.6	2
Q8K284	General transcription factor 3C polypeptide 1 (TF3C-alpha) (TFIIIC box B-binding subunit) (Transcription factor IIIC 220 kDa subunit) (TFIIIC 220 kDa subunit) (TFIIIC220) (Transcription factor IIIC subunit alpha)	Gtf3c1	1	1	0.428367	237.3	1
O08811	General transcription and DNA repair factor IIH helicase subunit XPD (TFIIH subunit XPD) (EC 3.6.4.12) (CXPD) (DNA excision repair protein ERCC-2) (DNA repair protein complementing XP-D cells) (Xeroderma pigmentosum group D-complementing protein)	Ercc2 Xpd	1	1	1.05263	86.8	1
Q9QXN0	Protein Shroom3	Shroom3 Kiaa1481 Shrm	1	1	0.453172	214.8	1
Q9CXJ1	Probable glutamate--tRNA ligase, mitochondrial (EC 6.1.1.17) (Glutamyl-tRNA synthetase) (GluRS)	Ears2 Kiaa1970	2	2	4.0153	58.3	3
Q8BJU2	Tetraspanin-9 (Tspan-9) (Tetraspan NET-5)	Tspan9 Net5	2	2	9.20502	26.7	3
Q8C0D5	Elongation factor-like GTPase 1 (Elongation factor Tu GTP-binding domain-containing protein 1) (Elongation factor-like 1) (Protein FAM42A)	Efl1 Eftud1	2	2	2.21828	125.7	2
E9PX52	Arf-GAP with SH3 domain, ANK repeat and PH domain-containing protein 2	Asap2	2	2	2.4	111.1	4
Q8BHC0	Lymphatic vessel endothelial hyaluronic acid receptor 1 (LYVE-1) (Cell surface retention sequence-binding protein 1) (CRSBP-1) (Extracellular link domain-containing protein 1)	Lyve1 Crsbp1 Xlkd1	2	2	5.34591	34.6	4
Q9CR27	WASH complex subunit 3 (Coiled-coil domain-containing protein 53)	Washc3 Ccdc53	2	2	10.8247	21.1	2
Q3UHH1	Zinc finger SWIM domain-containing protein 8	Zswim8 Kiaa0913	3	3	1.80131	196.9	3
A2AAY5	SH3 and PX domain-containing protein 2B (Factor for adipocyte differentiation 49) (Tyrosine kinase substrate with four SH3 domains)	Sh3pxd2b Fad49 Tks4	1	1	1.43172	101.5	1
Q925I7	Platelet-derived growth factor D (PDGF-D) (Spinal cord-derived growth factor B) (SCDGF-B) [Cleaved into: Platelet-derived growth factor D, latent form (PDGFD latent form); Platelet-derived growth factor D, receptor-binding form (PDGFD receptor-binding form)]	Pdgfd Scdgfb	1	1	3.51351	42.8	1
B2RPU8	MCG130675 (SCAN domain containing 3) (Zinc finger, BED type-containing 5)	Zbed5 2410018M08Rik Scand3 mCG_130675	2	2	4.89418	84.2	3
P83741	Serine/threonine-protein kinase WNK1 (EC 2.7.11.1) (Protein kinase lysine-deficient 1) (Protein kinase with no lysine 1)	Wnk1 Hsn2 Prkwnk1	3	3	1.30416	250.8	3
Q8CD91	SPARC-related modular calcium-binding protein 2 (Secreted modular calcium-binding protein 2) (SMOC-2)	Smoc2	1	1	1.78971	49.9	1
P97364	Selenide, water dikinase 2 (EC 2.7.9.3) (Selenium donor protein 2) (Selenophosphate synthase 2)	Sephs2 Sps2	2	2	5.75221	47.8	2
L7N466	5-formyltetrahydrofolate cyclo-ligase (EC 6.3.3.2)	Mthfsl	1	1	5.91133	23.2	2
P0DOV1	Interferon-activable protein 205-B (Ifi-205-B) (Interferon-inducible protein p205-B) (Myeloid cell nuclear differentiation antigen) (Protein D3)	Mnda Ifi205b	2	2	4.47059	46.9	2
Q9DC22	DDB1- and CUL4-associated factor 6 (IQ motif and WD repeat-containing protein 1) (Nuclear receptor interaction protein) (NRIP)	Dcaf6 Iqwd1	1	1	0.913242	97.5	1
Q8BGU5	Cyclin-Y (Cyclin fold protein 1)	Ccny Cfp1	3	3	12.9032	39.4	4
A0A0R4J065	Cysteine protease (EC 3.4.22.-)	Atg4b	2	2	8.14249	44.4	2
O08688	Calpain-5 (EC 3.4.22.-) (New calpain 3) (nCL-3)	Capn5 Ncl3	2	2	2.96875	72.9	2
Q9CZA6	Nuclear distribution protein nudE homolog 1 (NudE) (mNudE)	Nde1 Nude	2	2	8.13953	38.5	2
Q9CZP7	Hsp90 co-chaperone Cdc37-like 1	Cdc37l1	1	1	2.68657	38.4	1
Q8VCG4	Complement component C8 gamma chain	C8g	3	3	24.2574	22.5	4
Q8CIG9	F-box/LRR-repeat protein 8 (F-box and leucine-rich repeat protein 8) (F-box protein FBL8)	Fbxl8 Fbl8	1	1	1.87166	41.1	1
E9PV14	Band 4.1-like protein 1 (Fragment)	Epb41l1 Epb4.1l1	3	2	2.53759	117.1	3
Q3UMB9	WASH complex subunit 4 (WASH complex subunit SWIP)	Washc4 Kiaa1033	1	1	0.937766	136.3	1
Q3USK5	Transcriptional enhancer factor TEF-1	Tead1	1	1	2.75229	49.1	1
Q7TSS3	Inhibitor of kappaB kinase gamma (NF-kappa-B essential modulator)	Ikbkg	1	1	3.48837	50.2	1
P61294	Ras-related protein Rab-6B	Rab6b D9Bwg0185e	5	2	26.4423	23.4	11
Q8C547	HEAT repeat-containing protein 5B	Heatr5b Kiaa1414	4	4	1.98068	224.2	4
Q61712	DnaJ homolog subfamily C member 1 (DnaJ protein homolog MTJ1)	Dnajc1 Dnajl1 Mtj1	2	2	3.26087	63.8	2
P98064	Mannan-binding lectin serine protease 1 (EC 3.4.21.-) (Complement factor MASP-3) (Complement-activating component of Ra-reactive factor) (Mannose-binding lectin-associated serine protease 1) (MASP-1) (Mannose-binding protein-associated serine protease) (Ra-reactive factor serine protease p100) (RaRF) (Serine protease 5) [Cleaved into: Mannan-binding lectin serine protease 1 heavy chain; Mannan-bi…	Masp1 Crarf Masp3	3	3	3.83523	79.9	3
P06795	ATP-dependent translocase ABCB1 (ATP-binding cassette sub-family B member 1B) (Multidrug resistance protein 1B) (EC 7.6.2.2) (P-glycoprotein 1) (Phospholipid transporter ABCB1) (EC 7.6.2.1) (CD antigen CD243)	Abcb1b Abcb1 Mdr1 Mdr1b Pgy1 Pgy1-1	2	2	1.5674	140.9	2
Q8K3X4	Probable E3 ubiquitin-protein ligase IRF2BPL (EC 2.3.2.27) (Enhanced at puberty protein 1) (Interferon regulatory factor 2-binding protein-like)	Irf2bpl Eap1 Kiaa1865	5	5	8.90323	80.5	5
Q9EQF6	Dihydropyrimidinase-related protein 5 (DRP-5) (Collapsin response mediator protein 5) (CRMP-5)	Dpysl5 Crmp5	2	2	3.7234	61.5	2
Q91X20	Set1/Ash2 histone methyltransferase complex subunit ASH2 (ASH2-like protein)	Ash2l	1	1	1.28411	68.2	1
Q3UKC1	Tax1-binding protein 1 homolog	Tax1bp1	1	1	1.2285	93.6	1
Q91XX1	Protocadherin gamma C3 (Protocadherin gamma subfamily C, 3)	Pcdhgc3	2	2	2.99786	101	2
Q5RKN9	F-actin-capping protein subunit alpha	Capza1 mCG_9780	6	4	29.7203	32.9	10
Q8BMD6	Transmembrane protein 260	Tmem260	3	3	5.9744	78.9	4
A0A0R4J055	Dynamin-binding protein	Dnmbp	1	1	0.56962	177.1	1
Q9JL62	Glycolipid transfer protein (GLTP)	Gltp	1	1	4.78469	23.7	1
H7BX38	Stromal cell-derived factor 1	Cxcl12	1	1	6.72269	13.6	1
Q8CEI3	Coiled-coil domain-containing 28A	Ccdc28a	1	1	4.6875	21.1	1
Q61592	Growth arrest-specific protein 6 (GAS-6) (AXL receptor tyrosine kinase ligand)	Gas6	1	1	1.92878	74.6	1
Q8K2Q5	Coiled-coil-helix-coiled-coil-helix domain-containing protein 7	Chchd7	3	3	44.7059	10.1	3
O88839	Disintegrin and metalloproteinase domain-containing protein 15 (ADAM 15) (EC 3.4.24.-) (AD56) (Metalloprotease RGD disintegrin protein) (Metalloproteinase-like, disintegrin-like, and cysteine-rich protein 15) (MDC-15) (Metargidin)	Adam15 Mdc15	4	4	4.62963	92.6	4
E9QM38	Solute carrier family 12 member 2	Slc12a2	1	1	0.66335	130.6	1
Q8BYJ6	TBC1 domain family member 4 (Akt substrate of 160 kDa) (AS160)	Tbc1d4 As160 Kiaa0603	3	2	2.44836	147.4	3
P59041	DnaJ homolog subfamily C member 30, mitochondrial (Williams-Beuren syndrome chromosomal region 18 protein homolog)	Dnajc30 Wbscr18	1	1	4.10959	24.7	1
Q9ERV1	Probable E3 ubiquitin-protein ligase makorin-2 (EC 2.3.2.27) (RING-type E3 ubiquitin transferase makorin-2)	Mkrn2	2	2	4.80769	46.6	2
Q9CQS5	Serine/threonine-protein kinase RIO2 (EC 2.7.11.1) (RIO kinase 2)	Riok2	1	1	2.01097	62.5	1
L7N451	Interferon-induced very large GTPase 1	Gvin1	3	3	0.988875	280.6	3
Q3URS9	Coiled-coil domain-containing protein 51	Ccdc51	4	4	9.1133	45.1	5
Q9JLB2	MAGUK p55 subfamily member 5 (Protein associated with Lin-7 1)	Mpp5 Pals1	1	1	1.03704	77.2	2
Q9CYV5	Transmembrane protein 135 (Peroxisomal membrane protein 52) (PMP52)	Tmem135	2	2	4.58515	52.3	3
Q91YN1	Protein FAM118A	Fam118a	1	1	3.08123	40.4	1
P97822	Acidic leucine-rich nuclear phosphoprotein 32 family member E (Cerebellar postnatal development protein 1) (LANP-like protein) (LANP-L)	Anp32e Cpd1	1	1	6.15385	29.6	1
D3Z312	Tumor necrosis factor alpha-induced protein 8	Tnfaip8	1	1	4.24528	24.3	1
Q8BTY1	Kynurenine--oxoglutarate transaminase 1 (EC 2.6.1.7) (Cysteine-S-conjugate beta-lyase) (EC 4.4.1.13) (Glutamine transaminase K) (GTK) (Glutamine--phenylpyruvate transaminase) (EC 2.6.1.64) (Kynurenine aminotransferase 1) (Kynurenine aminotransferase I) (KATI) (Kynurenine--oxoglutarate transaminase I)	Kyat1 Ccbl1 Kat	2	1	5.66038	47.5	3
Q9D787	RING-type E3 ubiquitin-protein ligase PPIL2 (EC 2.3.2.27) (CYC4) (Probable inactive peptidyl-prolyl cis-trans isomerase-like 2) (PPIase)	Ppil2	2	1	3.07102	59	2
P70662	LIM domain-binding protein 1 (LDB-1) (Carboxyl-terminal LIM domain-binding protein 2) (CLIM-2) (LIM domain-binding factor CLIM2) (mLdb1) (Nuclear LIM interactor)	Ldb1 Nli	1	1	2.6764	46.5	1
A0JNU3	60 kDa lysophospholipase (EC 3.1.1.5) [Includes: L-asparaginase (EC 3.5.1.1) (L-asparagine amidohydrolase); Platelet-activating factor acetylhydrolase (PAF acetylhydrolase) (EC 3.1.1.47)]	Aspg	4	4	7.97872	60.6	6
A2A517	Cytohesin-1 (Pleckstrin homology, Sec7 and coiled-coil domains 1, isoform CRA_b) (Fragment)	Cyth1 Pscd1 mCG_142715	4	1	7.6087	52.5	4
Q9QXK7	Cleavage and polyadenylation specificity factor subunit 3 (EC 3.1.27.-) (Cleavage and polyadenylation specificity factor 73 kDa subunit) (CPSF 73 kDa subunit) (mRNA 3'-end-processing endonuclease CPSF-73)	Cpsf3 Cpsf73	3	3	4.38596	77.5	3
Q8BX10	Serine/threonine-protein phosphatase PGAM5, mitochondrial (EC 3.1.3.16) (Phosphoglycerate mutase family member 5)	Pgam5	3	3	10.4167	32	3
Q64355	Embryonal Fyn-associated substrate (SRC-interacting protein) (Signal-integrating protein)	Efs Sin	1	1	1.25	58.9	1
A2AJ76	Hemicentin-2	Hmcn2	3	3	0.529412	546.9	3
Q9Z2G6	Protein sel-1 homolog 1 (Suppressor of lin-12-like protein 1) (Sel-1L)	Sel1l Sel1h	3	3	3.16456	88.3	5
G3X8T2	RIKEN cDNA 5830416A07, isoform CRA_c (Zinc finger CCCH domain-containing protein 18)	Zc3h18 5830416A07Rik mCG_1040504	1	1	0.823045	108.2	1
P47757	F-actin-capping protein subunit beta (CapZ beta)	Capzb Cappb1	10	1	34.657	31.3	27
P49138	MAP kinase-activated protein kinase 2 (MAPK-activated protein kinase 2) (MAPKAP kinase 2) (MAPKAP-K2) (MAPKAPK-2) (MK-2) (MK2) (EC 2.7.11.1)	Mapkapk2 Rps6kc1	2	2	2.07254	44	2
Q62507	Cochlin (COCH-5B2)	Coch	2	2	4.52899	59.9	2
Q3TIU4	2',5'-phosphodiesterase 12 (2'-PDE) (2-PDE) (EC 3.1.4.-) (Mitochondrial deadenylase) (EC 3.1.13.4)	Pde12	2	2	4.27632	67.5	3
E9PZY8	Protein virilizer homolog	Virma 1110037F02Rik	1	1	0.483611	207	1
P62331	ADP-ribosylation factor 6	Arf6	2	2	12	20.1	2
G3UXC7	ADAMTS-like 3	Adamtsl3	2	2	0.87925	189.6	2
Q561M1	Acp1 protein (Low molecular weight phosphotyrosine protein phosphatase) (MCG7808, isoform CRA_c)	Acp1 mCG_7808	4	1	32.2785	17.9	7
E9Q1Q1	Microtubule-associated serine/threonine-protein kinase 2	Mast2	1	1	0.444444	197.9	1
Q9D8U2	Transmembrane protein 41A	Tmem41a	2	2	7.19697	29.4	2
Q80U38	Protein KHNYN (KH and NYN domain-containing protein)	Khnyn Kiaa0323	1	1	1.49031	74.5	1
Q8CG71	Prolyl 3-hydroxylase 2 (EC 1.14.11.7) (Leprecan-like protein 1)	P3h2 Leprel1	2	2	2.27596	80.1	2
Q9QXW2	F-box/WD repeat-containing protein 5 (F-box and WD-40 domain-containing protein 5)	Fbxw5 Fbw5	1	1	1.22164	64.6	1
P11928	2'-5'-oligoadenylate synthase 1A ((2-5')oligo(A) synthase 1A) (2-5A synthase 1A) (EC 2.7.7.84) (p42 OAS)	Oas1a Oias1	1	1	2.7248	42.4	1
Q91WU5	Arsenite methyltransferase (EC 2.1.1.137) (Methylarsonite methyltransferase) (S-adenosyl-L-methionine:arsenic(III) methyltransferase)	As3mt Cyt19	3	3	11.1702	41.8	3
Q3TLS3	GDP-D-glucose phosphorylase 1 (EC 2.7.7.78)	Gdpgp1	3	3	9.06736	42.5	4
Q99KH8	Serine/threonine-protein kinase 24 (EC 2.7.11.1) (Mammalian STE20-like protein kinase 3) (MST-3) (STE20-like kinase MST3) [Cleaved into: Serine/threonine-protein kinase 24 35 kDa subunit (Mammalian STE20-like protein kinase 3 N-terminal) (MST3/N); Serine/threonine-protein kinase 24 12 kDa subunit (Mammalian STE20-like protein kinase 3 C-terminal) (MST3/C)]	Stk24 Mst3 Stk3	6	2	14.8492	47.9	6
Q9D1X0	Nucleolar protein 3 (Apoptosis repressor with CARD)	Nol3 Arc	3	3	19.0909	24.6	3
O55033	Cytoplasmic protein NCK2 (Growth factor receptor-bound protein 4) (NCK adaptor protein 2) (Nck-2) (SH2/SH3 adaptor protein NCK-beta)	Nck2 Grb4	2	1	4.73684	42.9	2
Q9D0I6	WD repeat, SAM and U-box domain-containing protein 1	Wdsub1	2	2	4.00844	51.7	2
Q9DAU1	Protein canopy homolog 3 (Protein associated with Tlr4) (Trinucleotide repeat-containing gene 5 protein)	Cnpy3 Prat4a Tnrc5	2	2	6.52174	30.5	2
Q6ZWQ0	Nesprin-2 (KASH domain-containing protein 2) (KASH2) (Nuclear envelope spectrin repeat protein 2) (Nucleus and actin connecting element protein) (Protein NUANCE) (Synaptic nuclear envelope protein 2) (Syne-2)	Syne2	17	15	2.63311	782.2	18
O35943	Frataxin, mitochondrial (Fxn) (EC 1.16.3.1) [Cleaved into: Frataxin intermediate form; Frataxin mature form]	Fxn Frda	2	2	11.1111	22.9	2
B1APX2	RIKEN cDNA 5031439G07 gene	5031439G07Rik	2	2	4.25056	50.2	2
Q9Z120	tRNA (guanine-N(7)-)-methyltransferase (EC 2.1.1.33) (Methyltransferase-like protein 1) (mRNA (guanine-N(7)-)-methyltransferase) (EC 2.1.1.-) (miRNA (guanine-N(7)-)-methyltransferase) (EC 2.1.1.-) (tRNA (guanine(46)-N(7))-methyltransferase) (tRNA(m7G46)-methyltransferase)	Mettl1	1	1	5.22388	30.6	1
O55028	[3-methyl-2-oxobutanoate dehydrogenase [lipoamide]] kinase, mitochondrial (EC 2.7.11.4) (Branched-chain alpha-ketoacid dehydrogenase kinase) (BCKD-kinase) (BCKDHKIN)	Bckdk	2	2	4.85437	46.6	3
Q9JKK7	Tropomodulin-2 (Neuronal tropomodulin) (N-Tmod)	Tmod2	3	3	8.54701	39.5	3
A0A0J9YTU1	Ketohexokinase (Fragment)	Khk	1	1	2.88066	27.1	1
Q9CQE1	Protein NipSnap homolog 3B (NipSnap3B) (NipSnap-related protein) (Protein NipSnap homolog 3A) (NipSnap3A)	Nipsnap3b Nipsnap3a	2	2	9.7166	28.3	3
A0A0R4J170	Transcription activator BRG1	Smarca4	1	1	0.494743	181.7	1
Q6P5C5	Single-strand selective monofunctional uracil DNA glycosylase (EC 3.2.2.-)	Smug1	1	1	6.81004	30.6	1
Q7TQJ8	Wilms tumor protein 1-interacting protein (WT1-interacting protein)	Wtip	2	2	5.77889	42.2	2
J3QPR7	C-type lectin domain family 10 member A	Clec10a	7	2	23.7013	34.8	12
Q8R151	NFX1-type zinc finger-containing protein 1	Znfx1	2	2	0.628601	218.7	2
Q91YS8	Calcium/calmodulin-dependent protein kinase type 1 (EC 2.7.11.17) (CaM kinase I) (CaM-KI) (CaM kinase I alpha) (CaMKI-alpha)	Camk1	5	4	16.5775	41.6	5
Q9QZR0	E3 ubiquitin-protein ligase RNF25 (EC 2.3.2.27) (RING finger protein 25) (RING finger protein AO7) (RING-type E3 ubiquitin transferase RNF25)	Rnf25	1	1	3.28947	51.2	1
Q9R078	5'-AMP-activated protein kinase subunit beta-1 (AMPK subunit beta-1) (AMPKb)	Prkab1	1	1	2.96296	30.3	1
E9QAQ5	Glycogen synthase kinase-3 beta	Gsk3b	3	3	11.5473	48	3
E9QKC6	Tripartite motif-containing protein 2	Trim2	1	1	0.909091	84.3	1
Q9QXV3	Inhibitor of growth protein 1	Ing1	1	1	2.50896	32.1	1
Q91XV3	Brain acid soluble protein 1 (22 kDa neuronal tissue-enriched acidic protein) (Neuronal axonal membrane protein NAP-22)	Basp1 Nap22	2	2	9.29204	22.1	3
E9PUB7	Protein misato homolog 1	Msto1	3	3	5.39568	61.2	3
Q9EPT5	Solute carrier organic anion transporter family member 2A1 (Prostaglandin transporter) (PGT) (Solute carrier family 21 member 2)	Slco2a1 Oatp2a1 Slc21a2	2	2	3.26594	70.1	3
P59708	Splicing factor 3B subunit 6 (Pre-mRNA branch site protein p14) (SF3b 14 kDa subunit)	Sf3b6 Sf3b14	1	1	11.2	14.6	1
Q8QZY6	Tetraspanin-14 (Tspan-14) (Transmembrane 4 superfamily member 14)	Tspan14 D14Ertd226e Tm4sf14	1	1	4.07407	30.7	2
Q8BYU6	Torsin-1A-interacting protein 2	Tor1aip2 Ifrg15 Lull1	2	2	3.98406	54.5	3
B1AR74	Breast carcinoma-amplified sequence 3 homolog	Bcas3	1	1	1.16649	102.7	1
Q8VHG2	Angiomotin	Amot Kiaa1071	3	1	1.59858	120.8	3
Q8BZS9	Putative pre-mRNA-splicing factor ATP-dependent RNA helicase DHX32 (EC 3.6.4.13) (DEAH box protein 32) (MuDDX32)	Dhx32 Ddx32	3	3	4.43548	83.9	3
Q9CS00	Cactin	Cactin	2	2	1.5544	90.6	2
Q5PRF0	HEAT repeat-containing protein 5A	Heatr5a Kiaa1316	3	3	1.76644	219.8	3
A0A0A6YW36	Regulator of G-protein-signaling 7	Rgs7	2	2	3.56394	55.6	2
Q3UDK1	TRAF-type zinc finger domain-containing protein 1 (Protein FLN29)	Trafd1 Fln29	1	1	1.55172	64.2	1
E9PWB2	Casein kinase I isoform alpha	Csnk1a1	2	2	6.41711	43.4	2
Q9WV34	MAGUK p55 subfamily member 2 (Discs large homolog 2) (Protein MPP2)	Mpp2 Dlgh2	3	3	7.6087	61.5	3
O88667	GTP-binding protein RAD	Rrad	2	2	9.09091	33.3	2
Q9D853	EEF1A lysine methyltransferase 2 (EC 2.1.1.-) (Methyltransferase-like protein 10) (Protein-lysine N-methyltransferase Mettl10)	Eef1akmt2 Mettl10	1	1	3.68852	26.8	1
G3UZK1	Guanine nucleotide-binding protein subunit gamma	Gm20503	2	2	16.6667	16	2
A2AF47	Dedicator of cytokinesis protein 11 (Activated Cdc42-associated guanine nucleotide exchange factor) (ACG) (Zizimin-2)	Dock11 Ziz2	3	2	1.39894	237.6	3
D3YUY7	Tripartite motif protein 3, isoform CRA_a (Tripartite motif-containing protein 3)	Trim3 mCG_19734	2	2	2.68817	80.7	2
Q3UVD5	Leucine-rich repeat-containing G-protein coupled receptor 6	Lgr6	2	1	1.86143	104.2	2
A0A0R4J0E1	Fibrinogen-like protein 1	Fgl1 mCG_17732	2	2	5.73248	36.4	2
A5A4Y9	E3 ubiquitin-protein ligase PPP1R11 (TCTEX5 long isoform)	Ppp1r11	1	1	11.4504	14.5	1
D3YY09	Dr1-associated corepressor	Drap1	2	2	8.96226	23.1	2
Q8JZX4	Splicing factor 45 (45 kDa-splicing factor) (RNA-binding motif protein 17)	Rbm17 Spf45	2	2	4.69136	45.3	2
Q8R1F6	Protein HID1 (HID1 domain-containing protein) (Protein hid-1 homolog)	Hid1	1	1	1.52284	88.7	2
Q8R0J2	Mannose-P-dolichol utilization defect 1 (Mannose-P-dolichol utilization defect 1 protein)	Mpdu1	1	1	4.45344	26.4	1
Q5EBG8	Uncharacterized protein C1orf50 homolog		1	1	8.0402	21.8	1
O35344	Importin subunit alpha-4 (Importin alpha Q2) (Qip2) (Karyopherin subunit alpha-3)	Kpna3 Qip2	5	2	10.9405	57.7	7
Q8VD31	Tapasin-related protein (TAPASIN-R) (TAP-binding protein-like) (TAP-binding protein-related protein) (TAPBP-R) (Tapasin-like)	Tapbpl	3	3	6.65188	48.7	3
Q8CB65	Nuclear envelope integral membrane protein 2	Nemp2 Tmem194b	1	1	2.13777	47.9	1
Q80UG2	Plexin-A4	Plxna4 Kiaa1550	2	2	1.16218	212.4	2
Q08288	Cell growth-regulating nucleolar protein (Ly1 antibody-reactive protein) (Protein expressed in male leptotene and zygotene spermatocytes 264) (MLZ-264)	Lyar	2	2	7.21649	43.7	2
Q8BGV0	Probable asparagine--tRNA ligase, mitochondrial (EC 6.1.1.22) (Asparaginyl-tRNA synthetase) (AsnRS)	Nars2	4	4	6.07966	53.9	4
Q8BZB2	Phosphopantothenoylcysteine decarboxylase (PPC-DC) (EC 4.1.1.36) (CoaC)	Ppcdc Coac	1	1	8.33333	22.3	1
D3Z4P2	Lectin, mannose-binding 2-like, isoform CRA_b (VIP36-like protein)	Lman2l mCG_17749	3	3	9.77654	41.1	3
Q7TPR4	Alpha-actinin-1 (Alpha-actinin cytoskeletal isoform) (F-actin cross-linking protein) (Non-muscle alpha-actinin-1)	Actn1	53	2	60.426	103	210
Q3TMX7	Sulfhydryl oxidase 2 (EC 1.8.3.2) (Quiescin Q6-like protein 1)	Qsox2 Qscn6l1	2	2	3.17919	77.7	3
O88811	Signal transducing adapter molecule 2 (STAM-2) (Hrs-binding protein)	Stam2 Hbp	2	2	2.67686	57.4	2
Q9WUP7	Ubiquitin carboxyl-terminal hydrolase isozyme L5 (UCH-L5) (EC 3.4.19.12) (Ubiquitin C-terminal hydrolase UCH37) (Ubiquitin thioesterase L5)	Uchl5 Uch37	2	2	6.38298	37.6	2
Q99J10	Cytoplasmic tRNA 2-thiolation protein 1 (EC 2.7.7.-) (ATP-binding domain-containing protein 3) (Cytoplasmic tRNA adenylyltransferase 1)	Ctu1 Atpbd3 Ncs6	1	1	2.14286	43.8	1
Q8R035	Peptidyl-tRNA hydrolase ICT1, mitochondrial (EC 3.1.1.29) (39S ribosomal protein L58, mitochondrial) (MRP-L58) (Immature colon carcinoma transcript 1 protein homolog)	Mrpl58 Ict1	1	1	5.82524	23.5	1
Q8C6I2	Succinate dehydrogenase assembly factor 2, mitochondrial (SDH assembly factor 2) (SDHAF2)	Sdhaf2 Pgl2 Sdh5	3	3	18.2927	19.4	4
A0A0A6YX40	Immunoglobulin superfamily member 3	Igsf3	2	2	1.97694	136.9	2
Q3U2K8	Arf-GAP domain and FG repeat-containing protein 2	Agfg2 Hrbl	2	2	3.87755	50.2	2
Q01065	Calcium/calmodulin-dependent 3',5'-cyclic nucleotide phosphodiesterase 1B (Cam-PDE 1B) (EC 3.1.4.17) (63 kDa Cam-PDE)	Pde1b Pde1b1	1	1	1.68224	61.2	1
Q6A065	Centrosomal protein of 170 kDa (Cep170)	Cep170 Kiaa0470	2	2	1.38539	174.9	2
Q9Z1G3	V-type proton ATPase subunit C 1 (V-ATPase subunit C 1) (Vacuolar proton pump subunit C 1)	Atp6v1c1 Atp6c Atp6c1 Vatc	2	2	4.45026	43.9	2
Q8VCR8	Myosin light chain kinase 2, skeletal/cardiac muscle (MLCK2) (EC 2.7.11.18)	Mylk2	2	1	2.61011	65.9	3
Q9JHS3	Ragulator complex protein LAMTOR2 (Endosomal adaptor protein p14) (Late endosomal/lysosomal Mp1-interacting protein) (Late endosomal/lysosomal adaptor and MAPK and MTOR activator 2) (Mitogen-activated protein-binding protein-interacting protein) (Roadblock domain-containing protein 3)	Lamtor2 Mapbpip Robld3	1	1	12	13.5	1
A2AFF6	Cohesin subunit SA-2	Stag2	3	2	1.81388	145.6	3
A0A0B4J1P4	Immunoglobulin heavy variable 5-16 (Fragment)	Ighv5-16	1	1	9.40171	13.3	2
Q9DB50	AP-1 complex subunit sigma-2 (Adaptor protein complex AP-1 subunit sigma-1B) (Adaptor-related protein complex 1 subunit sigma-1B) (Clathrin assembly protein complex 1 sigma-1B small chain) (Golgi adaptor HA1/AP1 adaptin sigma-1B subunit) (Sigma 1B subunit of AP-1 clathrin) (Sigma-adaptin 1B) (Sigma1B-adaptin)	Ap1s2	2	2	11.25	18.9	2
Q8R0J7	Vacuolar protein sorting-associated protein 37B (Vps37B) (ESCRT-I complex subunit VPS37B)	Vps37b	1	1	4.21053	31	1
Q9R060	Cytosolic Fe-S cluster assembly factor NUBP1 (Nucleotide-binding protein 1) (NBP 1)	Nubp1	1	1	3.4375	34.1	1
P26151	High affinity immunoglobulin gamma Fc receptor I (IgG Fc receptor I) (Fc-gamma RI) (FcRI) (CD antigen CD64)	Fcgr1 Fcg1	1	1	2.72277	44.9	1
Q91X51	Golgi reassembly-stacking protein 1 (Golgi peripheral membrane protein p65) (Golgi reassembly-stacking protein of 65 kDa) (GRASP65)	Gorasp1	1	1	4.70852	46.9	1
Q9D8Z2	TP53-regulated inhibitor of apoptosis 1 (Protein 15E1.1) (WF-1) (p53-inducible cell-survival factor) (p53CSV)	Triap1 15e1.1	1	1	10.5263	8.8	1
F6RT34	Myelin basic protein (Fragment)	Mbp	2	2	5.66038	23.2	2
A2AKQ8	Tetratricopeptide repeat protein 30A2 (TPR repeat protein 30A2)	Ttc30a2	1	1	2.10843	76.1	1
Q8BGA8	Acyl-coenzyme A synthetase ACSM5, mitochondrial (EC 6.2.1.2)	Acsm5 Macs3	1	1	2.42215	64.3	1
P54320	Elastin (Tropoelastin)	Eln	1	1	1.74419	71.9	1
Q9JJF3	Ribosomal oxygenase 1 (Bifunctional lysine-specific demethylase and histidyl-hydroxylase NO66) (EC 1.14.11.-) (EC 1.14.11.27) (Histone lysine demethylase NO66)	Riox1 Mapjd No66 MNCb-7109	1	1	2.32172	67.5	1
Q6PFY1	F-BAR and double SH3 domains protein 1 (Protein nervous wreck 2) (NWK2)	Fchsd1	1	1	1.88953	76.2	1
F8VPK0	Tetratricopeptide repeat domain 37	Ttc37	3	3	2.11132	173.8	3
Q9QWV9	Cyclin-T1 (CycT1) (Cyclin-T)	Ccnt1	1	1	1.24309	80.5	1
Q9WTR1	Transient receptor potential cation channel subfamily V member 2 (TrpV2) (Growth factor-regulated calcium channel) (GRC) (Osm-9-like TRP channel 2) (OTRPC2)	Trpv2 Grc	1	1	1.45503	85.9	1
Q8R570	Synaptosomal-associated protein 47 (SNAP-47) (Synaptosomal-associated 47 kDa protein)	Snap47	1	1	2.66344	46.5	2
A0A0G2JDV3	Guanylate-binding protein 6	Gbp6	5	1	6.05565	70.4	5
Q6P5B5	Fragile X mental retardation syndrome-related protein 2 (Fragile X mental retardation, autosomal homolog 2)	Fxr2 Fxr2h	3	2	4.00593	74.2	3
A0A0N4SW93	C2 domain-containing protein 5	C2cd5	2	2	1.90114	115.7	2
P52785	Guanylyl cyclase GC-E (EC 4.6.1.2) (Guanylate cyclase 2E)	Gucy2e Guc2e	2	1	2.88809	120.6	3
S4R2K9	Ankyrin-3 (Fragment)	Ank3	3	1	1.06789	284.5	4
Q9D273	Corrinoid adenosyltransferase (EC 2.5.1.17) (Cob(II)alamin adenosyltransferase) (Cob(II)yrinic acid a,c-diamide adenosyltransferase) (Cobinamide/cobalamin adenosyltransferase) (Methylmalonic aciduria type B homolog)	Mmab	2	2	8.43882	26.3	2
Q8CIE4	Protein mono-ADP-ribosyltransferase PARP10 (EC 2.4.2.-) (ADP-ribosyltransferase diphtheria toxin-like 10) (ARTD10) (Poly [ADP-ribose] polymerase 10) (PARP-10)	Parp10	3	3	2.60417	103.6	3
A0A0G2JGQ4	NEDD8 ultimate buster 1 (RIKEN cDNA 6330412F12, isoform CRA_c)	Nub1 6330412F12Rik mCG_16508	1	1	1.25392	73.1	1
O08800	Serpin B8	Serpinb8	1	1	3.74332	42.1	1
Q9D7V9	N-acylethanolamine-hydrolyzing acid amidase (EC 3.5.1.-) (N-acylsphingosine amidohydrolase-like) (ASAH-like protein) [Cleaved into: N-acylethanolamine-hydrolyzing acid amidase subunit alpha; N-acylethanolamine-hydrolyzing acid amidase subunit beta]	Naaa Asahl	2	2	6.07735	40.1	3
P70236	Dual specificity mitogen-activated protein kinase kinase 6 (MAP kinase kinase 6) (MAPKK 6) (EC 2.7.12.2) (MAPK/ERK kinase 6) (MEK 6) (SAPKK3)	Map2k6 Prkmk6 Sapkk3	1	1	2.69461	37.4	1
F7BBA2	StAR-related lipid transfer protein 7, mitochondrial (Fragment)	Stard7	1	1	1.95599	47.1	1
Q9EPQ7	StAR-related lipid transfer protein 5 (START domain-containing protein 5) (StARD5)	Stard5	1	1	4.22535	23.9	1
Q03249	Galactose-1-phosphate uridylyltransferase (Gal-1-P uridylyltransferase) (EC 2.7.7.12) (UDP-glucose--hexose-1-phosphate uridylyltransferase)	Galt	1	1	2.63852	43.2	1
Q544X6	Ferrochelatase (EC 4.99.1.1)	Fech	2	2	5.92417	47.4	2
Q921X9	Protein disulfide-isomerase A5 (EC 5.3.4.1) (Protein disulfide isomerase-related protein)	Pdia5 Pdir	3	3	5.60928	59.2	5
Q8R124	Kelch-like protein 36	Klhl36	1	1	1.95759	69.9	1
P16110	Galectin-3 (Gal-3) (35 kDa lectin) (Carbohydrate-binding protein 35) (CBP 35) (Galactose-specific lectin 3) (IgE-binding protein) (L-34 galactoside-binding lectin) (Laminin-binding protein) (Lectin L-29) (Mac-2 antigen)	Lgals3	6	6	19.3182	27.5	7
O88532	Zinc finger RNA-binding protein	Zfr	3	3	2.51397	116.8	4
Q9CRA8	Exosome complex component RRP46 (Exosome component 5) (Ribosomal RNA-processing protein 46)	Exosc5 D7Wsu180e Rrp46	1	1	5.53191	25.2	1
Q99LN9	Deoxyhypusine hydroxylase (DOHH) (EC 1.14.99.29) (Deoxyhypusine dioxygenase) (Deoxyhypusine monooxygenase)	Dohh	2	2	10.596	32.9	2
Q3U186	Probable arginine--tRNA ligase, mitochondrial (EC 6.1.1.19) (Arginyl-tRNA synthetase) (ArgRS)	Rars2 Rarsl	1	1	1.7301	65.3	1
Q8QZR4	Out at first protein homolog	Oaf D9Ucla1	1	1	3.5461	31.5	1
Q8K440	ATP-binding cassette sub-family A member 8-B	Abca8b Abca8 Kiaa0822	1	1	0.740741	182.9	2
Q9CWW6	Peptidyl-prolyl cis-trans isomerase NIMA-interacting 4 (EC 5.2.1.8) (Parvulin-14) (Par14) (Peptidyl-prolyl cis-trans isomerase Pin4) (PPIase Pin4) (Rotamase Pin4)	Pin4	1	1	9.16031	13.8	1
Q61481	Calcium/calmodulin-dependent 3',5'-cyclic nucleotide phosphodiesterase 1A (Cam-PDE 1A) (EC 3.1.4.17) (61 kDa Cam-PDE)	Pde1a	2	2	3.89381	64.5	2
Q9DB36	General transcription factor 3C polypeptide 6	Gtf3c6	1	1	3.50877	25.6	1
A2RSJ4	UHRF1-binding protein 1-like (Syntaxin-6 Habc-interacting protein of 164 kDa)	Uhrf1bp1l Kiaa0701 Ship164	2	2	1.37268	161.8	2
Q91YJ5	Translation initiation factor IF-2, mitochondrial (IF-2(Mt)) (IF-2Mt) (IF2(mt))	Mtif2	2	2	3.71389	81.2	2
Q9CQX6	MCG141091, isoform CRA_a (Predicted gene 16286)	Gm16286 mCG_141091	3	2	10.4545	24.8	3
Q8BYN3	Inositol-tetrakisphosphate 1-kinase (EC 2.7.1.134) (Inositol 1,3,4-trisphosphate 5/6-kinase) (Inositol-triphosphate 5/6-kinase) (Ins(1,3,4)P(3) 5/6-kinase) (EC 2.7.1.159)	Itpk1	1	1	5.01193	46.1	1
Q8VCB3	Glycogen [starch] synthase, liver (EC 2.4.1.11)	Gys2	2	2	3.26705	80.8	2
Q9CSH3	Exosome complex exonuclease RRP44 (EC 3.1.13.-) (EC 3.1.26.-) (Protein DIS3 homolog) (Ribosomal RNA-processing protein 44)	Dis3 Kiaa1008 Rrp44	3	3	3.86221	108.8	4
P70191	TNF receptor-associated factor 5	Traf5	1	1	1.43369	64.1	2
Q8BTZ4	Anaphase-promoting complex subunit 5 (APC5) (Cyclosome subunit 5)	Anapc5 MNCb-2778	1	1	1.48649	83	1
Q9R0M4	Podocalyxin (Podocalyxin-like protein 1) (PC) (PCLP-1)	Podxl Pclp1	3	3	4.57256	53.4	3
P05063	Fructose-bisphosphate aldolase C (EC 4.1.2.13) (Aldolase 3) (Brain-type aldolase) (Scrapie-responsive protein 2) (Zebrin II)	Aldoc Aldo3 Scrg2	6	3	18.1818	39.4	10
P52431	DNA polymerase delta catalytic subunit (EC 2.7.7.7) (EC 3.1.11.-)	Pold1	2	2	2.17195	123.7	2
B1AYL1	Sodium channel protein	Scn7a	3	3	1.48721	192.1	3
Q3U5V8	MCG49559 (Syntaxin-11)	Stx11 mCG_49559	1	1	3.13589	33.4	1
G5E8Z6	Leukocyte cell derived chemotaxin 1, isoform CRA_a (Leukocyte cell-derived chemotaxin 1)	Cnmd Chmd Lect1 mCG_19384	1	1	3.5503	37.6	1
Q5SUS9	RNA-binding protein EWS	Ewsr1	2	2	3.93343	69	2
O35166	Golgi SNAP receptor complex member 2 (27 kDa Golgi SNARE protein) (Membrin)	Gosr2 Gs27	1	1	5.18868	24.7	1
P54754	Ephrin type-B receptor 3 (EC 2.7.10.1) (Developmental kinase 5) (mDK-5) (Tyrosine-protein kinase receptor SEK-4)	Ephb3 Etk2 Mdk5 Sek4	1	1	1.30916	109.6	1
Q7TPV4	Myb-binding protein 1A (Myb-binding protein of 160 kDa)	Mybbp1a P160	1	1	0.818452	151.9	2
P01639	Ig kappa chain V-V region MOPC 41	Gm5571	1	1	10.7692	14.3	1
F6QC57	E3 ubiquitin-protein ligase (EC 2.3.2.27)	Ubr3	2	2	1.32135	212.9	3
Q3TWL2	Type 1 phosphatidylinositol 4,5-bisphosphate 4-phosphatase (Type 1 PtdIns-4,5-P2 4-Ptase) (EC 3.1.3.78) (PtdIns-4,5-P2 4-Ptase I) (Transmembrane protein 55B)	Pip4p1 Tmem55b	1	1	3.87324	30	1
Q9DBG1	Sterol 26-hydroxylase, mitochondrial (EC 1.14.15.15) (5-beta-cholestane-3-alpha,7-alpha,12-alpha-triol 26-hydroxylase) (Cytochrome P-450C27/25) (Cytochrome P450 27) (Sterol 27-hydroxylase) (Vitamin D(3) 25-hydroxylase)	Cyp27a1	2	2	3.37711	60.7	2
Q8VCV2	Ndrg3 protein (Protein NDRG3)	Ndrg3	2	1	5.41237	43	2
Q05895	Thrombospondin-3	Thbs3 Tsp3	6	6	7.94979	104.1	7
P21180	Complement C2 (EC 3.4.21.43) (C3/C5 convertase) [Cleaved into: Complement C2b fragment; Complement C2a fragment]	C2	2	1	2.89474	84.7	3
Q9CQG9	Transmembrane protein 100	Tmem100	1	1	8.20896	14.5	1
Q6PGJ3	L1 cell adhesion molecule (Neural cell adhesion molecule L1)	L1cam	5	5	4.68626	140.8	5
A0A087WR24	alpha-1,2-Mannosidase (EC 3.2.1.-)	Edem3	1	1	1.05597	105.8	1
Q9CWG8	Protein arginine methyltransferase NDUFAF7, mitochondrial (EC 2.1.1.320) (NADH dehydrogenase [ubiquinone] complex I, assembly factor 7) (Protein midA homolog)	Ndufaf7	5	5	16.055	48.4	5
Q9JHS4	ATP-dependent Clp protease ATP-binding subunit clpX-like, mitochondrial	Clpx	3	3	4.88959	69.2	4
Q9DC37	Major facilitator superfamily domain-containing protein 1	Mfsd1	1	1	2.37069	51.4	1
Q924K8	Metastasis-associated protein MTA3	Mta3	3	1	5.24535	67	3
Q80YV4	Pantothenate kinase 4 (mPanK4) (Pantothenic acid kinase 4) [Includes: Pantothenate kinase (EC 2.7.1.33); 4'-phosphopantetheine phosphatase (EC 3.1.3.-)]	Pank4	6	6	8.41463	91.5	7
Q9QXY9	Peroxisomal biogenesis factor 3 (Peroxin-3) (Peroxisomal assembly protein PEX3)	Pex3	1	1	4.56989	42.2	1
O55135	Eukaryotic translation initiation factor 6 (eIF-6) (B4 integrin interactor) (CAB) (p27(BBP))	Eif6 Itgb4bp	4	4	26.9388	26.5	6
Q3UHC7	Disabled homolog 2-interacting protein (DAB2-interacting protein) (ASK-interacting protein 1) (DOC-2/DAB-2 interactive protein)	Dab2ip Kiaa1743	2	1	1.51388	131.6	2
A0A1W2P788	alpha-1,2-Mannosidase (EC 3.2.1.-) (Fragment)	Man1a	2	2	2.82258	82	2
Q8N7N5	DDB1- and CUL4-associated factor 8 (WD repeat-containing protein 42A)	Dcaf8 D1Ucla4 H326 Wdr42a	4	4	5.92217	66	4
P98192	Dihydroxyacetone phosphate acyltransferase (DAP-AT) (DHAP-AT) (EC 2.3.1.42) (Acyl-CoA:dihydroxyacetonephosphateacyltransferase) (Glycerone-phosphate O-acyltransferase)	Gnpat Dhapat	1	1	2.35988	76.8	1
Q673H1	Tumor suppressor candidate gene 1 protein homolog	Tusc1	1	1	6.34146	22.7	1
A0A0A6YVR1	Immunoglobulin heavy variable 14-4 (Fragment)	Ighv14-4	2	1	16.2393	12.9	3
E9QNH7	Acyl-CoA-binding domain-containing protein 5	Acbd5	2	2	4.12574	56.7	2
Q9CPZ8	COX assembly mitochondrial protein homolog (Cmc1p)	Cmc1	1	1	9.43396	12.5	1
Q9WVM3	Anaphase-promoting complex subunit 7 (APC7) (Cyclosome subunit 7) (Prediabetic NOD sera-reactive autoantigen)	Anapc7 Apc7	1	1	1.59292	63	1
Q9ESY9	Gamma-interferon-inducible lysosomal thiol reductase (EC 1.8.-.-) (Gamma-interferon-inducible protein IP-30) (Lysosomal thiol reductase IP30)	Ifi30 Gilt Ip30	1	1	4.43548	27.8	1
Q8CCK0	Core histone macro-H2A.2 (Histone macroH2A2) (mH2A2)	H2afy2 H2afy3	2	2	5.37634	40.1	2
Q8CGU1	Calcium-binding and coiled-coil domain-containing protein 1 (Coiled-coil coactivator protein)	Calcoco1 CocoA Kiaa1536	4	4	5.49928	77.2	4
A2AKG8	Focadhesin	Focad Kiaa1797	1	1	0.667408	198.8	1
Q8CHI8	E1A-binding protein p400 (EC 3.6.4.-) (Domino homolog) (mDomino) (p400 kDa SWI2/SNF2-related protein)	Ep400 Kiaa1498	1	1	0.325521	337	1
A2API5	Low-density lipoprotein receptor-related protein 1B	Lrp1b	2	1	0.347902	513.2	2
Q9JI10	Serine/threonine-protein kinase 3 (EC 2.7.11.1) (Mammalian STE20-like protein kinase 2) (MST-2) (STE20-like kinase MST2) [Cleaved into: Serine/threonine-protein kinase 3 36kDa subunit (MST2/N); Serine/threonine-protein kinase 3 20kDa subunit (MST2/C)]	Stk3 Mess1 Mst2	4	3	7.64588	56.8	5
P36423	Thromboxane-A synthase (TS) (TXA synthase) (TXS) (EC 5.3.99.5) (Cytochrome P450 5A1)	Tbxas1 Cyp5 Cyp5a1	1	1	2.25141	60.4	1
A0A0R4J044	Poly(rC)-binding protein 4	Pcbp4	2	1	4.71464	41.4	3
P28667	MARCKS-related protein (Brain protein F52) (MARCKS-like protein 1) (Macrophage myristoylated alanine-rich C kinase substrate) (Mac-MARCKS) (MacMARCKS)	Marcksl1 Mlp Mrp	1	1	7.5	20.2	1
A0A0N4SVV4	Retinoic acid receptor responder protein 2	Rarres2	1	1	6.74847	18.5	1
Q9ES56	Trafficking protein particle complex subunit 4 (Synbindin) (TRS23 homolog)	Trappc4 Sbdn	2	2	11.4155	24.4	2
Q9JJZ4	Ubiquitin-conjugating enzyme E2 J1 (EC 2.3.2.23) (E2 ubiquitin-conjugating enzyme J1) (Non-canonical ubiquitin-conjugating enzyme 1) (NCUBE-1)	Ube2j1 Ncube1	1	1	4.71698	35	1
E9QN63	Arf-GAP with SH3 domain, ANK repeat and PH domain-containing protein 1	Asap1	1	1	1.22058	127.3	1
Q921S7	39S ribosomal protein L37, mitochondrial (L37mt) (MRP-L37)	Mrpl37	5	5	13.948	48.3	5
Q8C5Q4	G-rich sequence factor 1 (GRSF-1)	Grsf1	1	1	1.67015	53	1
A0A0R4J0H8	Fibronectin type III domain-containing protein 3B	Fndc3b	2	2	1.73985	132.7	2
Q9Z1M4	Ribosomal protein S6 kinase beta-2 (S6K-beta-2) (S6K2) (EC 2.7.11.1) (70 kDa ribosomal protein S6 kinase 2) (p70 ribosomal S6 kinase beta) (p70 S6 kinase beta) (p70 S6K-beta) (p70 S6KB)	Rps6kb2	1	1	2.06186	53.5	1
Q60929	Myocyte-specific enhancer factor 2A	Mef2a	1	1	2.00803	53.5	1
Q9CZ28	Vacuolar-sorting protein SNF8 (ESCRT-II complex subunit VPS22)	Snf8 D11Moh34	2	2	8.52713	28.9	2
F2Z3U3	Ras association (RalGDS/AF-6) and pleckstrin homology domains 1	Raph1	1	1	1.02686	136.7	1
Q9DB82	N-acetyltransferase 5 (ARD1 homolog, S. cerevisiae), isoform CRA_a (N-alpha-acetyltransferase 20)	Naa20 Nat5 mCG_10160	1	1	4.78723	21.5	1
Q9DBE7	Double-stranded RNA-binding protein Staufen homolog 1 (Staufen (RNA binding protein) homolog 1 (Drosophila)) (Staufen (RNA binding protein) homolog 1 (Drosophila), isoform CRA_a) (Staufen isoform I2)	Stau1 mCG_14603	1	1	2.04499	54.1	2
Q9Z2C8	Y-box-binding protein 2 (FRGY2 homolog) (Germ cell-specific Y-box-binding protein)	Ybx2 Msy2	2	1	7.22222	38.2	2
Q920I9	WD repeat-containing protein 7 (TGF-beta resistance-associated protein TRAG)	Wdr7 Kiaa0541 Trag	2	2	1.34318	163.3	2
Q9D7I5	Phospholysine phosphohistidine inorganic pyrophosphate phosphatase (EC 3.1.3.-) (EC 3.6.1.1)	Lhpp	2	2	6.2963	29.1	3
Q9D1Q1	M-phase phosphoprotein 6	Mphosph6	2	2	9.31677	19.1	2
D3YU56	Inner nuclear membrane protein Man1	Lemd3	1	1	0.957447	102.5	1
P56371	Ras-related protein Rab-4A	Rab4a Rab4	5	3	28.8991	24.4	12
Q9QYI6	DnaJ homolog subfamily B member 9 (Endoplasmic reticulum DNA J domain-containing protein 4) (ER-resident protein ERdj4) (ERdj4) (mDj7)	Dnajb9	1	1	3.6036	25.6	1
E9Q8Q6	Coiled-coil domain-containing 141	Ccdc141	3	3	2.09014	173.5	3
P54818	Galactocerebrosidase (GALCERase) (EC 3.2.1.46) (Galactocerebroside beta-galactosidase) (Galactosylceramidase) (Galactosylceramide beta-galactosidase)	Galc	1	1	2.33918	77.2	2
Q9D3E6	Cohesin subunit SA-1 (SCC3 homolog 1) (Stromal antigen 1)	Stag1 Sa1	3	2	1.74881	144.3	3
G3X959	Periphilin 1, isoform CRA_a (Periphilin-1)	Pphln1 mCG_114279	1	1	4.19948	43.8	1
Q91V36	Nuclear receptor-binding protein 2	Nrbp2	1	1	2.20441	57.3	1
E0CX20	Protein BUD31 homolog (Protein G10 homolog)	Bud31	1	1	7.63889	17	2
F7C376	Voltage-dependent L-type calcium channel subunit alpha	Cacna1c	1	1	0.540054	248.7	1
Q9DBU0	Transmembrane 9 superfamily member 1	Tm9sf1	1	1	1.32013	68.9	1
Q9D8C4	Interferon-induced 35 kDa protein homolog (IFP 35) (Ifi-35)	Ifi35	1	1	2.7972	31.9	1
Q922H9	Zinc finger protein 330 (Nucleolar autoantigen 36) (Nucleolar cysteine-rich protein)	Znf330 Noa36 Zfp330	2	2	5.06329	35.6	2
Q8BGI5	Peroxisome assembly protein 26 (Peroxin-26)	Pex26	2	2	6.55738	34	2
Q91XC8	Death-associated protein 1 (DAP-1)	Dap	2	2	18.6275	11.1	2
Q2TBE6	Phosphatidylinositol 4-kinase type 2-alpha (EC 2.7.1.67) (Phosphatidylinositol 4-kinase type II-alpha)	Pi4k2a	2	2	4.38413	54.2	2
Q5U4D9	THO complex subunit 6 homolog (WD repeat-containing protein 58)	Thoc6 Wdr58	2	2	8.79765	37.3	2
Q9JIY5	Serine protease HTRA2, mitochondrial (EC 3.4.21.108) (High temperature requirement protein A2) (HtrA2) (Omi stress-regulated endoprotease) (Serine protease 25) (Serine proteinase OMI)	Htra2 Omi Prss25	4	4	12.4454	49.3	6
Q60855	Receptor-interacting serine/threonine-protein kinase 1 (EC 2.7.11.1) (Cell death protein RIP) (Receptor-interacting protein 1) (RIP-1)	Ripk1 Rinp Rip	2	2	2.89634	74.8	2
Q8BM72	Heat shock 70 kDa protein 13 (Microsomal stress-70 protein ATPase core) (Stress-70 protein chaperone microsome-associated 60 kDa protein)	Hspa13 Stch	2	2	4.88323	51.7	2
D3Z7W0	Iron-sulfur cluster assembly enzyme ISCU, mitochondrial (MCG3543, isoform CRA_a)	Iscu mCG_3543	2	2	8.13397	22.1	2
Q9Z2W1	Serine/threonine-protein kinase 25 (EC 2.7.11.1) (Ste20-like kinase) (Sterile 20/oxidant stress-response kinase 1) (SOK-1) (Ste20/oxidant stress response kinase 1)	Stk25 Sok1	5	2	12.4413	48.1	5
H3BL37	Treacle protein	Tcof1	2	2	1.03245	138.5	2
Q8VEL0	Motile sperm domain-containing protein 1	Mospd1	1	1	4.22535	24.1	1
Q6Y7W8	GRB10-interacting GYF protein 2 (PERQ amino acid-rich with GYF domain-containing protein 2) (Trinucleotide repeat-containing gene 15 protein)	Gigyf2 Kiaa0642 Perq2 Tnrc15	2	2	1.16189	149.1	2
Q8C3X8	Lipase maturation factor 2 (Transmembrane protein 112B) (Transmembrane protein 153)	Lmf2 Tmem112b Tmem153	1	1	1.85185	79.9	2
A0A0U1RP94	Casein kinase I isoform gamma-1	Csnk1g1	1	1	1.95228	53	1
P52633	Signal transducer and transcription activator 6	Stat6	3	3	3.46476	93.4	3
A2AQP0	Myosin-7B (Myosin cardiac muscle beta chain) (Myosin heavy chain 7B, cardiac muscle beta isoform)	Myh7b	12	1	4.37919	221.4	20
P16330	2',3'-cyclic-nucleotide 3'-phosphodiesterase (CNP) (CNPase) (EC 3.1.4.37)	Cnp Cnp1	4	4	10	47.1	4
P23780	Beta-galactosidase (EC 3.2.1.23) (Acid beta-galactosidase) (Lactase)	Glb1 Bgl Glb-1	2	2	4.48223	73.1	2
E9Q236	ATP-binding cassette, sub-family C (CFTR/MRP), member 4	Abcc4	2	2	1.13208	148.8	2
O54983	Ketimine reductase mu-crystallin (EC 1.5.1.25) (NADP-regulated thyroid-hormone-binding protein)	Crym	1	1	4.79233	33.5	1
E9Q7X6	Protein HEG homolog 1	Heg1	1	1	0.972326	141.8	1
Q3TAP4	AP-5 complex subunit beta-1 (Adaptor-related protein complex 5 beta subunit) (Beta5)	Ap5b1 Gm962	1	1	1.82648	94.6	1
H3BK65	Epidermal growth factor receptor substrate 15	Eps15	9	9	10.6109	102.2	12
Q8BJ48	N-acetylglucosamine-1-phosphodiester alpha-N-acetylglucosaminidase (EC 3.1.4.45) (Mannose 6-phosphate-uncovering enzyme) (Phosphodiester alpha-GlcNAcase)	Nagpa	2	2	2.70793	56	2
Q923G2	DNA-directed RNA polymerases I, II, and III subunit RPABC3 (RNA polymerases I, II, and III subunit ABC3) (DNA-directed RNA polymerase II subunit H) (RPB17) (RPB8 homolog)	Polr2h	1	1	10.6667	17.1	1
Q5IRJ6	Zinc transporter 9 (ZnT-9) (GRIP1-associated coactivator 63) (GAC63) (Solute carrier family 30 member 9)	Slc30a9	4	4	5.82011	62.8	4
Q9DBD5	Proline-, glutamic acid- and leucine-rich protein 1 (Modulator of non-genomic activity of estrogen receptor)	Pelp1 Mnar	1	1	1.06857	118	1
B1AQZ2	Kinesin-like protein	Kif3a	3	3	3.86207	82.6	3
Q9CR26	Vacuolar protein sorting-associated protein VTA1 homolog (SKD1-binding protein 1) (SBP1)	Vta1	2	2	5.82524	33.9	3
O54950	5'-AMP-activated protein kinase subunit gamma-1 (AMPK gamma1) (AMPK subunit gamma-1) (AMPKg)	Prkag1 Prkaac	3	3	7.87879	37.5	4
Q9DBS2	Tumor protein p63-regulated gene 1-like protein (Mossy fiber terminal-associated vertebrate-specific presynaptic protein) (Protein FAM79A)	Tprg1l Fam79a Mover Tprgl	1	1	4.88722	29.8	2
Q8R502	Volume-regulated anion channel subunit LRRC8C (Factor for adipocyte differentiation 158) (Leucine-rich repeat-containing protein 8C)	Lrrc8c Ad158 Fad158	3	2	4.98132	92.3	3
Q6P4T0	Autophagy-related protein 2 homolog A	Atg2a Kiaa0404	2	2	0.992685	210.8	2
Q02384	Son of sevenless homolog 2 (SOS-2) (mSOS-2)	Sos2	2	2	2.02551	153	2
Q9D125	28S ribosomal protein S25, mitochondrial (MRP-S25) (S25mt)	Mrps25 Rpms25	1	1	5.26316	19.9	1
G5E814	MCG5603 (NADH dehydrogenase [ubiquinone] 1 alpha subcomplex subunit 11)	Ndufa11 mCG_5603	3	3	34.965	15.1	6
Q8BYH7	TBC1 domain family member 17	Tbc1d17	2	2	2.94574	72.8	3
P51829	Adenylate cyclase type 7 (EC 4.6.1.1) (ATP pyrophosphate-lyase 7) (Adenylate cyclase type VII) (Adenylyl cyclase 7)	Adcy7	2	1	2.2748	122.6	2
Q5FWJ7	Vesicle transport through interaction with t-SNAREs homolog 1A (Vesicle transport through interaction with t-SNAREs homolog 1A (Yeast), isoform CRA_d) (Vti1a protein)	Vti1a mCG_140667	1	1	4.01786	25.9	1
A0A087WR52	Arf-GAP domain and FG repeat-containing protein 1 (Fragment)	Agfg1	2	2	3.10345	60.1	2
A0A0R4J092	Beta-mannosidase	Manba	1	1	1.02389	100.8	1
Q99LG2	Transportin-2 (Karyopherin beta-2b)	Tnpo2	7	3	8.11725	100.4	8
Q9CPT3	N-acylneuraminate-9-phosphatase (EC 3.1.3.29) (Haloacid dehalogenase-like hydrolase domain-containing protein 4) (Neu5Ac-9-Pase)	Nanp Hdhd4	1	1	7.25806	27.8	1
Q8VC65	Nurim (Nuclear envelope membrane protein) (Nuclear rim protein)	Nrm	1	1	3.81679	29.4	1
Q9CSB4	Partitioning defective 3 homolog B (Amyotrophic lateral sclerosis 2 chromosomal region candidate gene 19 protein homolog) (PAR3-beta) (Partitioning defective 3-like protein) (PAR3-L protein)	Pard3b Als2cr19 Par3l	1	1	0.74813	132.7	1
A0A1W2P712	Ral GTPase-activating protein subunit alpha-1	Ralgapa1	1	1	0.384246	234	1
O88697	Serine/threonine-protein kinase 16 (EC 2.7.11.1) (Embryo-derived protein kinase) (Edpk) (Myristoylated and palmitoylated serine/threonine-protein kinase) (MPSK) (Protein kinase Krct) (Protein kinase PKL12) (TGF-beta-stimulated factor 1) (TSF-1) (Tyrosine-protein kinase STK16) (EC 2.7.10.2)	Stk16 Edpk Krct Mpsk1 Pkl12 Tsf1	1	1	4.59016	34.4	1
E9QNW6	Platelet-activating factor acetylhydrolase (EC 3.1.1.47)	Pafah2	2	2	5.06024	46.2	2
G3X920	Armadillo repeat containing 8, isoform CRA_b (Armadillo repeat-containing protein 8)	Armc8 mCG_18099	1	1	1.48588	75.4	1
Q8BVF2	Phosducin-like protein 3 (Viral IAP-associated factor 1) (VIAF-1)	Pdcl3 Viaf1	1	1	3.33333	27.6	1
Q9CZ62	Centrosomal protein of 97 kDa (Cep97) (Leucine-rich repeat and IQ domain-containing protein 2)	Cep97 Lrriq2	1	1	1.51869	94.6	1
Q9CW46	Ribonucleoprotein PTB-binding 1 (Protein raver-1)	Raver1 Kiaa1978	5	5	6.5508	79.3	5
E9Q800	MICOS complex subunit MIC60 (Mitofilin)	Immt	44	1	56.701	75.6	85
Q8BK03	Mitoguardin 2 (Protein FAM73B)	Miga2 Fam73b	2	2	4.38449	65.5	4
Q03734	Serine protease inhibitor A3M (Serpin A3M)	Serpina3m	7	2	19.6172	47	23
Q8C0L9	Glycerophosphocholine phosphodiesterase GPCPD1 (EC 3.1.4.2) (Glycerophosphodiester phosphodiesterase 5) (Preimplantation protein 4)	Gpcpd1 Gde5 Kiaa1434 Prei4	1	1	1.18519	76.5	1
Q6ZQ82	Rho GTPase-activating protein 26 (Rho-type GTPase-activating protein 26)	Arhgap26 Kiaa0621	1	1	1.10565	92	1
Q8K330	Protein phosphatase Slingshot homolog 3 (EC 3.1.3.16) (EC 3.1.3.48) (SSH-like protein 3) (SSH-3L) (mSSH-3L)	Ssh3 Ssh3l	1	1	2.46533	72.2	1
D3YYU8	Obscurin-like protein 1	Obsl1	1	1	0.665188	197.8	1
A0A087WRU0	Tensin 1 (Fragment)	Tns1	39	2	21.0557	181.8	80
Q8VDI9	Alpha-1,2-mannosyltransferase ALG9 (EC 2.4.1.259) (EC 2.4.1.261) (Dol-P-Man:Man(6)GlcNAc(2)-PP-Dol alpha-1,2-mannosyltransferase) (Dol-P-Man:Man(8)GlcNAc(2)-PP-Dol alpha-1,2-mannosyltransferase)	Alg9	1	1	2.12766	69.5	1
Q3TMX5	Arginine-rich, mutated in early stage tumors, isoform CRA_b (Mesencephalic astrocyte-derived neurotrophic factor)	Manf Armet mCG_19507	3	3	21.7877	20.4	4
O55192	Sodium-dependent noradrenaline transporter (Norepinephrine transporter) (NET) (Solute carrier family 6 member 2)	Slc6a2	1	1	2.75527	69.2	1
Q3UCV8	Ubiquitin thioesterase otulin (EC 3.4.19.12) (Deubiquitinating enzyme otulin) (OTU domain-containing deubiquitinase with linear linkage specificity) (Ubiquitin thioesterase Gumby)	Otulin Fam105b Gum	3	3	6.25	40.3	3
Q9CTY5	Calcium uptake protein 3, mitochondrial (EF-hand domain-containing family member A2)	Micu3 Efha2	2	2	3.63289	59.8	2
Q9ERS5	Pleckstrin homology domain-containing family A member 2 (PH domain-containing family A member 2) (PH domain-containing adaptor PHAD47) (Tandem PH domain-containing protein 2) (TAPP-2)	Plekha2 Tapp2	1	1	2.58824	47.4	1
Q9JLQ0	CD2-associated protein (Mesenchyme-to-epithelium transition protein with SH3 domains 1) (METS-1)	Cd2ap Mets1	2	2	3.92465	70.4	2
O70310	Glycylpeptide N-tetradecanoyltransferase 1 (EC 2.3.1.97) (Myristoyl-CoA:protein N-myristoyltransferase 1) (NMT 1) (Type I N-myristoyltransferase) (Peptide N-myristoyltransferase 1)	Nmt1	2	1	3.62903	56.9	2
Q8BV13	COP9 signalosome complex subunit 7b (SGN7b) (Signalosome subunit 7b) (JAB1-containing signalosome subunit 7b)	Cops7b Csn7b	1	1	3.40909	29.7	1
Q99LJ0	CTTNBP2 N-terminal-like protein	Cttnbp2nl Kiaa1433	5	5	8.15047	69.8	8
E9QMV2	Costars family protein ABRACL	Abracl 3110003A17Rik	1	1	11.1111	9.1	1
A0A0M3HEP7	Phospholipid-transporting ATPase (EC 7.6.2.1)	Atp8a1	4	4	3.35052	131.4	4
Q9WV69	Dematin (Dematin actin-binding protein) (Erythrocyte membrane protein band 4.9)	Dmtn Epb4.9 Epb49	2	2	5.4321	45.4	3
G5E8Q8	Adhesion G protein-coupled receptor F5 (G-protein coupled receptor 116)	Adgrf5 Gpr116	1	1	0.593472	149.3	1
D3Z2R5	Selenoprotein N (SelN)	Selenon Seln Sepn1	2	2	2.1544	62.5	2
D3YUV9	Eukaryotic translation initiation factor 4E type 2	Eif4e2	2	2	8.10811	29.5	2
Q921J2	GTP-binding protein Rheb (Ras homolog enriched in brain)	Rheb	4	4	16.8478	20.4	7
P52800	Ephrin-B2 (ELF-2) (EPH-related receptor tyrosine kinase ligand 5) (LERK-5) (HTK ligand) (HTK-L)	Efnb2 Elf2 Epl5 Eplg5 Htkl Lerk5	1	1	3.57143	37.2	1
Q7TMR0	Lysosomal Pro-X carboxypeptidase (EC 3.4.16.2) (Proline carboxypeptidase) (Prolylcarboxypeptidase) (PRCP)	Prcp	3	3	6.72098	55	3
Q8BG07	Phospholipase D4 (PLD 4) (EC 3.1.4.4) (Choline phosphatase 4) (Phosphatidylcholine-hydrolyzing phospholipase D4)	Pld4	2	2	4.17495	56.1	2
A3KG93	Lysine-specific histone demethylase (EC 1.-.-.-)	Kdm1a	1	1	0.801833	94.6	1
Q9DB73	NADH-cytochrome b5 reductase 1 (b5R.1) (EC 1.6.2.2) (NAD(P)H:quinone oxidoreductase type 3 polypeptide A2)	Cyb5r1 Nqo3a2	2	2	7.86885	34.1	2
P16627	Heat shock 70 kDa protein 1-like (Heat shock 70 kDa protein 1L) (Heat shock 70 kDa-like protein 1) (Spermatid-specific heat shock protein 70)	Hspa1l Hsc70t	19	2	30.4212	70.6	71
Q9D0L7	Armadillo repeat-containing protein 10	Armc10	2	2	8.82353	33.3	2
Q8R5M0	PDZ domain-containing protein GIPC3 (Regulator of G-protein signaling 19-interacting protein 3)	Gipc3 Rgs19ip3	1	1	3.367	32.1	1
Q8R0A0	General transcription factor IIF subunit 2 (EC 3.6.4.12) (ATP-dependent helicase GTF2F2) (Transcription initiation factor IIF subunit beta) (TFIIF-beta)	Gtf2f2	1	1	3.61446	28.4	1
Q9D142	Uridine diphosphate glucose pyrophosphatase (UDPG pyrophosphatase) (UGPPase) (EC 3.6.1.45) (Nucleoside diphosphate-linked moiety X motif 14) (Nudix motif 14)	Nudt14	2	2	10.3604	24.4	2
O88597	Beclin-1 (Coiled-coil myosin-like BCL2-interacting protein) [Cleaved into: Beclin-1-C 35 kDa; Beclin-1-C 37 kDa]	Becn1	1	1	2.45536	51.6	1
Q922J6	Tetraspanin-2 (Tspan-2)	Tspan2	2	1	8.1448	24.2	2
A0A1W2P6X3	Formin-like protein 1	Fmnl1	1	1	0.636364	122.6	1
Q922J9	Fatty acyl-CoA reductase 1 (EC 1.2.1.84)	Far1	2	2	3.30097	59.4	2
Q920F6	Structural maintenance of chromosomes protein 1B (SMC protein 1B) (SMC-1-beta) (SMC-1B)	Smc1b Smc1l2	2	1	1.04167	144.4	3
E9Q223	Hemoglobin, beta adult s chain (Fragment)	Hbb-bs	8	1	92.233	11.1	101
Q9CYZ6	Required for excision 1-B domain-containing protein	Rex1bd	1	1	4.73373	18.7	1
Q921K8	TRPM8 channel-associated factor 2 (TRP channel-associated factor 2)	Tcaf2 Fam115c Fam139a	1	1	1.19695	101.5	1
Q6P3F7	Popdc2 protein (Popeye domain-containing protein 2)	Popdc2	1	1	3.50404	41.8	1
Q9D2C2	Protein SAAL1 (Synoviocyte proliferation-associated in collagen-induced arthritis protein 1) (SPACIA1)	Saal1	1	1	2.1097	52.7	1
P62881	Guanine nucleotide-binding protein subunit beta-5 (Gbeta5) (Transducin beta chain 5)	Gnb5	3	3	6.58228	43.5	3
Q8VIB3	Type 2 lactosamine alpha-2,3-sialyltransferase (EC 2.4.99.-) (CMP-NeuAc:beta-galactoside alpha-2,3-sialyltransferase VI) (ST3Gal VI) (ST3GalVI) (Sialyltransferase 10)	St3gal6 Siat10	1	1	4.86322	37.8	1
Q80XI4	Phosphatidylinositol 5-phosphate 4-kinase type-2 beta (EC 2.7.1.149) (1-phosphatidylinositol 5-phosphate 4-kinase 2-beta) (Diphosphoinositide kinase 2-beta) (Phosphatidylinositol 5-phosphate 4-kinase type II beta) (PI(5)P 4-kinase type II beta) (PIP4KII-beta) (PtdIns(5)P-4-kinase isoform 2-beta)	Pip4k2b Pip5k2b	3	1	6.00962	47.3	4
Q8C6E0	Cilia- and flagella-associated protein 36 (Coiled-coil domain-containing protein 104)	Cfap36 Ccdc104	2	1	4.95627	39.6	3
P0CAX8	T-cell activation GTPase-activating protein 1	Tagap1 Fksg15	1	1	2.9703	55.7	1
A0A140LHR4	Serpin H1 (Fragment)	Serpinh1	10	1	46.3054	21.6	26
Q8BKE6	Cytochrome P450 20A1 (EC 1.14.-.-)	Cyp20a1	3	3	7.57576	52.1	5
Q9D6Z1	Nucleolar protein 56 (Nucleolar protein 5A)	Nop56 Nol5a	5	5	7.24138	64.4	5
Q8BR63	Protein FAM177A1	Fam177a1	1	1	9.17874	23.6	1
Q6PIX5	Inactive rhomboid protein 1 (iRhom1) (Epidermal growth factor receptor-related protein) (Rhomboid family member 1)	Rhbdf1 Dist1 Irhom1 Kiaa4242	1	1	0.817757	97.2	1
Q9CZX9	ER membrane protein complex subunit 4 (Transmembrane protein 85)	Emc4 Tmem85	2	2	12.0219	20.1	2
Q14CH7	Alanine--tRNA ligase, mitochondrial (EC 6.1.1.7) (Alanyl-tRNA synthetase) (AlaRS)	Aars2 Aarsl Gm89 Kiaa1270	5	5	4.18367	106.7	5
P53798	Squalene synthase (SQS) (SS) (EC 2.5.1.21) (FPP:FPP farnesyltransferase) (Farnesyl-diphosphate farnesyltransferase)	Fdft1 Erg9	1	1	3.36538	48.1	1
F6Q269	JmjC domain-containing protein 8	Jmjd8	2	1	10.6952	21	2
Q8R105	Vacuolar protein sorting-associated protein 37C (ESCRT-I complex subunit VPS37C)	Vps37c	2	2	5.96591	38.4	2
B2RR82	Intersectin-2 (Itsn2 protein)	Itsn2	4	4	2.31454	191.6	5
Q99LI7	Cleavage stimulation factor subunit 3 (CF-1 77 kDa subunit) (Cleavage stimulation factor 77 kDa subunit) (CSTF 77 kDa subunit) (CstF-77)	Cstf3	1	1	1.25523	82.8	1
Q99K85	Phosphoserine aminotransferase (PSAT) (EC 2.6.1.52) (Endometrial progesterone-induced protein) (EPIP) (Phosphohydroxythreonine aminotransferase)	Psat1 Psa Psat	1	1	3.78378	40.4	1
Q9Z0G0	PDZ domain-containing protein GIPC1 (GAIP C-terminus-interacting protein) (RGS-GAIP-interacting protein) (RGS19-interacting protein 1) (SemaF cytoplasmic domain-associated protein 1) (SEMCAP-1) (Synectin)	Gipc1 Gipc Rgs19ip1 Semcap1	2	2	5.40541	36.1	2
G3X9Y5	Ubiquitin conjugation factor E4 A (Ubiquitination factor E4A, UFD2 homolog (S. cerevisiae))	Ube4a mCG_50277	2	2	2.21198	124.4	2
Q8BGT0	Osteopetrosis-associated transmembrane protein 1 (Chloride channel 7 beta subunit) (Grey-lethal protein)	Ostm1 Gl	2	2	7.39645	38	2
Q501J2	Protein N-lysine methyltransferase FAM173A (EC 2.1.1.-)	Fam173a	1	1	7.86026	24.7	1
E9PX68	Solute carrier family 4 (anion exchanger), member 1, adaptor protein	Slc4a1ap	2	2	2.01613	82.8	2
B1AZI6	THO complex subunit 2 (Tho2)	Thoc2	1	1	0.815558	182.7	1
Q91XB0	Three-prime repair exonuclease 1 (EC 3.1.11.2) (3'-5' exonuclease TREX1)	Trex1	1	1	3.18471	33.7	1
K4DI58	Cell adhesion molecule 3 (Immunoglobulin superfamily, member 4B, isoform CRA_a)	Cadm3 Igsf4b mCG_1205	1	1	1.86047	46.7	1
Q6P8M1	Putative deoxyribonuclease TATDN1 (EC 3.1.21.-)	Tatdn1	1	1	4.40678	33.3	1
Q8CI08	SLAIN motif-containing protein 2	Slain2 Kiaa1458	1	1	1.72117	62.3	1
Q80U95	Ubiquitin-protein ligase E3C (EC 2.3.2.26) (HECT-type ubiquitin transferase E3C)	Ube3c Kiaa0010 Kiaa10	2	2	1.56971	123.9	2
Q06770	Corticosteroid-binding globulin (CBG) (Serpin A6) (Transcortin)	Serpina6 Cbg	1	1	2.77078	44.7	1
Q9CPR5	39S ribosomal protein L15, mitochondrial (L15mt) (MRP-L15)	Mrpl15	2	2	6.44068	33.5	2
S4R1S4	Receptor-type tyrosine-protein phosphatase C (EC 3.1.3.48) (Leukocyte common antigen) (L-CA) (Lymphocyte antigen 5) (Ly-5) (T200) (CD antigen CD45)	Ptprc Ly-5	2	2	1.62413	144.7	3
B0V2N1	Receptor-type tyrosine-protein phosphatase S (R-PTP-S) (EC 3.1.3.48) (PTPNU-3) (Receptor-type tyrosine-protein phosphatase sigma) (R-PTP-sigma)	Ptprs	1	1	0.576822	211.8	2
O55057	Retinal rod rhodopsin-sensitive cGMP 3',5'-cyclic phosphodiesterase subunit delta (GMP-PDE delta)	Pde6d	1	1	8	17.3	1
Q8BTX9	Inactive hydroxysteroid dehydrogenase-like protein 1	Hsdl1	2	2	5.75758	36.8	2
G3UWD3	3-hydroxybutyrate dehydrogenase type 2 (3-hydroxybutyrate dehydrogenase, type 2, isoform CRA_b)	Bdh2 mCG_22366	1	1	4.31373	27.7	1
Q923X4	Glutaredoxin-2, mitochondrial	Glrx2 Grx2	1	1	6.41026	17.3	1
Q8CJ19	[F-actin]-monooxygenase MICAL3 (EC 1.14.13.225) (Molecule interacting with CasL protein 3) (MICAL-3)	Mical3 Kiaa0819 Kiaa1364	4	4	1.95685	223.6	5
Q9D1M4	Eukaryotic translation elongation factor 1 epsilon-1 (Elongation factor p18) (Multisynthase complex auxiliary component p18)	Eef1e1	1	1	5.17241	19.8	1
Q8BT51	Cytochrome c oxidase assembly factor 4 homolog, mitochondrial (Coiled-coil-helix-coiled-coil-helix domain-containing protein 8)	COA4 Chchd8	1	1	10.3448	10.1	1
A0A140LHG7	Mediator of RNA polymerase II transcription subunit 25	Med25	2	2	1.74782	85.3	2
E9PUH7	Nuclear factor 1	Nfix	1	1	2.02429	54.1	1
Q8VE19	GATOR complex protein MIOS	Mios	2	2	1.94286	98.3	2
A0A1C7CYU5	FTS and Hook-interacting protein	Fam160a2	2	2	2.02224	108	2
P63300	Selenoprotein W (SelW)	Selenow Selw Sepw1	1	1	11.3636	9.7	1
P05132	cAMP-dependent protein kinase catalytic subunit alpha (PKA C-alpha) (EC 2.7.11.11)	Prkaca Pkaca	8	3	23.0769	40.5	9
P10404	MLV-related proviral Env polyprotein [Cleaved into: Surface protein (SU); Transmembrane protein (TM)]		2	2	3.43214	69.6	2
Q9Z2Q5	39S ribosomal protein L40, mitochondrial (L40mt) (MRP-L40) (Nuclear localization signal-containing protein deleted in velocardiofacial syndrome homolog)	Mrpl40 Nlvcf	1	1	7.76699	24.3	1
E9QMP6	Non-specific serine/threonine protein kinase (EC 2.7.11.1)	Mark2	1	1	1.41753	86.3	1
P21995	Embigin (Teratocarcinoma glycoprotein Gp-70)	Emb Gp70	2	1	5.15152	37	3
Q9Z0H8	CAP-Gly domain-containing linker protein 2 (Cytoplasmic linker protein 115) (CLIP-115) (Cytoplasmic linker protein 2)	Clip2 Cyln2 Kiaa0291	8	5	6.59026	115.8	8
Q5U5V2	Hydroxylysine kinase (5-hydroxy-L-lysine kinase) (EC 2.7.1.81) (Aminoglycoside phosphotransferase domain-containing protein 1)	Hykk Agphd1	1	1	2.92553	42.3	1
Q925E0	Gamma-2-syntrophin (G2SYN) (Syntrophin-5) (SYN5)	Sntg2	1	1	2.41187	59.6	1
Q80YA7	Dipeptidyl peptidase 8 (DP8) (EC 3.4.14.5) (Dipeptidyl peptidase VIII) (DPP VIII)	Dpp8	2	1	3.47534	102.1	2
Q8CJF7	Protein ELYS (Embryonic large molecule derived from yolk sac) (Protein MEL-28) (Putative AT-hook-containing transcription factor 1)	Ahctf1 Elys	1	1	0.445831	247.5	1
P47880	Insulin-like growth factor-binding protein 6 (IBP-6) (IGF-binding protein 6) (IGFBP-6)	Igfbp6 Igfbp-6	1	1	3.36134	25.3	1
P58742	Aladin (Adracalin)	Aaas	2	2	4.94505	59.4	3
Q8VCP9	C-type lectin domain family 14 member A	Clec14a	2	2	4.13943	49	2
P36552	Oxygen-dependent coproporphyrinogen-III oxidase, mitochondrial (COX) (Coprogen oxidase) (Coproporphyrinogenase) (EC 1.3.3.3)	Cpox Cpo	1	1	2.93454	49.7	1
A0A0R4J036	Neurofilament 3, medium (Neurofilament medium polypeptide)	Nefm Nef3 mCG_2494	2	1	2.24057	95.9	12
E9Q0A7	Oxidation resistance protein 1	Oxr1	2	2	2.04327	91.7	2
Q3V460	Gene model 561, (NCBI) (MCG2918) (Small integral membrane protein 26)	Smim26 Gm561 mCG_2918	1	1	10.2804	12	1
D3Z2N1	Ankyrin repeat domain-containing protein 9	Ankrd9	1	1	3.62117	38.9	2
E9PXC0	Signal recognition particle 54 kDa protein	Srp54c SRP54	3	3	5.55556	55.8	3
Q505B7	Protein archease (Protein ZBTB8OS)	Zbtb8os Arch	1	1	4.16667	19.7	1
A0A0R4J254	Exportin-4	Xpo4	1	1	0.608167	129.9	1
Q1HFZ0	tRNA (cytosine(34)-C(5))-methyltransferase (EC 2.1.1.203) (Myc-induced SUN domain-containing protein) (Misu) (NOL1/NOP2/Sun domain family member 2)	Nsun2 D13Wsu123e Misu	2	2	2.37781	85.4	2
F6RMJ1	SUN domain-containing protein 1 (Fragment)	Sun1	4	1	14.7287	29	4
Q8K2F8	Protein LSM14 homolog A (Protein FAM61A) (RNA-associated protein 55A) (mRAP55A)	Lsm14a Fam61a Rap55a	1	1	2.1645	50.5	1
Q6VGS5	Protein Daple (Coiled-coil domain-containing protein 88C) (Dvl-associating protein with a high frequency of leucine residues)	Ccdc88c Daple	1	1	0.447984	226.4	1
Q9D7M8	DNA-directed RNA polymerase II subunit RPB4 (RNA polymerase II subunit B4) (DNA-directed RNA polymerase II subunit D)	Polr2d	2	2	15.493	16.3	2
Q8BG60	Thioredoxin-interacting protein (Vitamin D3 up-regulated protein 1)	Txnip Vdup1	1	1	2.51889	44.3	1
Q3TEL6	E3 ubiquitin ligase Rnf157 (EC 2.3.2.27) (RING finger protein 157) (RING-type E3 ubiquitin transferase Rnf157)	Rnf157 Kiaa1917	1	1	1.16788	74.5	1
E9Q4N7	AT-rich interactive domain-containing protein 1B (ARID domain-containing protein 1B) (BRG1-associated factor 250b) (BAF250B)	Arid1b Baf250b	1	1	0.846702	237.6	1
Q8R0F6	Integrin-linked kinase-associated serine/threonine phosphatase 2C (ILKAP) (EC 3.1.3.16)	Ilkap	1	1	1.78571	42.7	1
Q61107	Guanylate-binding protein 4 (EC 3.6.5.-) (GTP-binding protein 3) (GBP-3) (GTP-binding protein 4) (GBP-4) (Guanine nucleotide-binding protein 4) (Guanylate-binding protein 3)	Gbp4 Gbp3	3	2	3.3871	70.8	3
Q8R3V6	CUE domain-containing protein 1	Cuedc1	1	1	3.60825	42.8	1
P70429	Ena/VASP-like protein (Ena/vasodilator-stimulated phosphoprotein-like)	Evl	2	1	5.07246	44.3	3
Q8VCE2	GPN-loop GTPase 1 (EC 3.6.5.-) (MBD2-interacting protein) (MBDin) (XPA-binding protein 1)	Gpn1 Mbdin Xab1	1	1	3.76344	41.6	1
Q99K28	ADP-ribosylation factor GTPase-activating protein 2 (ARF GAP 2) (GTPase-activating protein ZNF289) (Zinc finger protein 289)	Arfgap2 Zfp289 Znf289	2	2	4.61538	56.6	2
Q8K0B2	Probable lysosomal cobalamin transporter (LMBR1 domain-containing protein 1) (Protein N90b)	Lmbrd1	1	1	3.35196	61	1
P59222	Scavenger receptor class F member 2 (Scavenger receptor expressed by endothelial cells 2 protein) (SREC-II)	Scarf2 Srec2	1	1	0.960384	87.8	1
Q6P6J9	Thioredoxin domain-containing protein 15	Txndc15	1	1	3.48837	38.1	1
Q61286	Transcription factor 12 (TCF-12) (Class A helix-loop-helix transcription factor ME1) (DNA-binding protein HTF4) (E-box-binding protein) (Transcription factor HTF-4)	Tcf12 Alf1 Meb	1	1	1.27479	75.8	1
Q9JM62	Receptor expression-enhancing protein 6 (Polyposis locus protein 1-like 1) (TB2 protein-like 1)	Reep6 Dp1l1 Tb2l1	2	2	11.4428	22.2	2
Q9CQ20	Mid1-interacting protein 1 (Gastrulation-specific G12-like protein) (Mid1-interacting G12-like protein) (Protein STRAIT11499 homolog) (Spot 14-related protein) (S14R) (Spot 14-R)	Mid1ip1 Mig12	1	1	10.4396	20.3	1
Q99MD6	Thioredoxin reductase 3 (EC 1.8.1.9) (Thioredoxin and glutathione reductase) (Thioredoxin reductase TR2)	Txnrd3 Tgr Trxr3	1	1	2.14724	71.3	1
Q9JIB0	Ran guanine nucleotide release factor (RanGNRF) (Ran-binding protein MOG1)	Rangrf Mog1 Rangnrf	1	1	4.32432	20.4	1
B2RRE7	OTU domain-containing protein 4 (EC 3.4.19.12)	Otud4 Kiaa1046	1	1	0.722674	123	1
Q9D187	Cytosolic iron-sulfur assembly component 2B (Mitotic spindle-associated MMXD complex subunit MIP18)	Ciao2b Fam96b Mip18	2	2	17.1779	17.7	2
Q8VD57	Vesicle transport protein SFT2B (SFT2 domain-containing protein 2)	Sft2d2	1	1	6.28931	17.5	1
H9KV05	Deleted.		1	1	1.68971	73.6	2
Q8VE38	Oxidoreductase NAD-binding domain-containing protein 1 (EC 1.-.-.-)	Oxnad1	3	3	9.96785	34.7	3
Q61733	28S ribosomal protein S31, mitochondrial (MRP-S31) (S31mt) (Imogen 38)	Mrps31 Imogn38	2	2	4.6875	43.9	2
Q99PL6	UBX domain-containing protein 6 (UBX domain-containing protein 1)	Ubxn6 Ubxd1 Ubxdc2	4	4	9.27602	49.8	7
Q9CZC8	Secernin-1	Scrn1 Kiaa0193	7	7	19.0821	46.3	9
Q8R2Q8	Bone marrow stromal antigen 2 (BST-2) (HM1.24 antigen) (CD antigen CD317)	Bst2	2	2	11.0465	19.1	2
Q9QZM0	Ubiquilin-2 (Chap1) (DSK2 homolog) (Protein linking IAP with cytoskeleton 2) (PLIC-2) (Ubiquitin-like product Chap1/Dsk2)	Ubqln2 Plic2	4	1	7.36677	67.3	6
S4R290	WD repeat-containing protein 41	Wdr41	1	1	2.35546	48.1	1
Q9CZX7	Type 2 phosphatidylinositol 4,5-bisphosphate 4-phosphatase (Type 2 PtdIns-4,5-P2 4-Ptase) (EC 3.1.3.78) (PtdIns-4,5-P2 4-Ptase II) (Transmembrane protein 55A)	Pip4p2 Tmem55a	1	1	10.8949	28	1
Q9Z0E0	Neurochondrin (M-Sema F-associating protein of 75 kDa) (Norbin)	Ncdn Kiaa0607 Sfap75	1	1	1.92044	78.8	1
Q9D8X2	Coiled-coil domain-containing protein 124	Ccdc124	3	2	16.5899	25.3	4
O08738	Caspase-6 (CASP-6) (EC 3.4.22.59) (Apoptotic protease Mch-2) [Cleaved into: Caspase-6 subunit p18; Caspase-6 subunit p11]	Casp6	3	3	13.7681	31.6	3
Q07079	Insulin-like growth factor-binding protein 5 (IBP-5) (IGF-binding protein 5) (IGFBP-5)	Igfbp5 Igfbp-5	2	2	7.01107	30.4	2
Q9D0J4	ADP-ribosylation factor-like protein 2	Arl2	1	1	5.43478	20.9	2
Q80ZX0	Sec24-related gene family, member B (S. cerevisiae)	Sec24b	6	6	7.19424	135.5	7
Q80X71	Transmembrane protein 106B	Tmem106b	1	1	4.72727	31.2	2
Q8C0K5	Graves disease carrier protein homolog (GDC) (Mitochondrial solute carrier protein homolog) (Solute carrier family 25 member 16)	Slc25a16 Gda	1	1	2.10843	36.2	1
Q80W00	Serine/threonine-protein phosphatase 1 regulatory subunit 10 (MHC class I region proline-rich protein CAT53)	Ppp1r10 Cat53 Pnuts	1	1	0.788288	94.3	1
Q8BRB1	Eph receptor A3 (Ephrin type-A receptor 3)	Epha3	1	1	1.01626	110	1
Q9CQP3	Coiled-coil-helix-coiled-coil-helix domain-containing protein 5	Chchd5	1	1	12.7273	12.3	1
Q80UY1	Carnosine N-methyltransferase (EC 2.1.1.22)	Carnmt1	1	1	3.25	46.3	1
O70152	Dolichol-phosphate mannosyltransferase subunit 1 (EC 2.4.1.83) (Dolichol-phosphate mannose synthase subunit 1) (DPM synthase subunit 1) (Dolichyl-phosphate beta-D-mannosyltransferase subunit 1) (Mannose-P-dolichol synthase subunit 1) (MPD synthase)	Dpm1	3	3	12.6923	29.2	4
A2BE28	Ribosomal biogenesis protein LAS1L (Protein LAS1 homolog)	Las1l	3	3	4.25258	89.4	3
Q8BXA5	Cleft lip and palate transmembrane protein 1-like protein (CLPTM1-like protein)	Clptm1l	1	1	2.41187	62.1	1
G5E8A0	Oxysterol-binding protein	Osbpl11 mCG_130137	6	6	8.19022	84.3	8
Q9CR76	Transmembrane protein 186	Tmem186	2	2	8.7963	24.6	2
Q9D6S7	Ribosome-recycling factor, mitochondrial (RRF) (Ribosome-releasing factor, mitochondrial)	Mrrf	1	1	6.10687	29	2
Q9Z0F7	Gamma-synuclein (Persyn)	Sncg Persyn	1	1	16.2602	13.2	1
Q80VZ7	TNFAIP3-interacting protein 2 (Tnip2 protein)	Tnip2	1	1	2.66075	51.5	1
Q9DB30	Phosphorylase b kinase gamma catalytic chain, liver/testis isoform (PHK-gamma-LT) (PHK-gamma-T) (EC 2.7.11.19) (Phosphorylase kinase subunit gamma-2)	Phkg2	1	1	2.46305	46.5	1
Q07968	Coagulation factor XIII B chain (Protein-glutamine gamma-glutamyltransferase B chain) (Transglutaminase B chain)	F13b Cf13b	3	3	5.23169	76.1	4
A0A1W2P8A8	Receptor expression-enhancing protein	Reep3	1	1	3.74532	30.6	1
Q9D3P8	Plasminogen receptor (KT) (Plg-R(KT))	Plgrkt	2	2	14.2857	17.3	2
P10630	Eukaryotic initiation factor 4A-II (eIF-4A-II) (eIF4A-II) (EC 3.6.4.13) (ATP-dependent RNA helicase eIF4A-2)	Eif4a2 Ddx2b	13	2	30.2211	46.4	29
E9QAU9	Leucine-rich repeat and calponin homology domain-containing protein 3	Lrch3	4	4	5.52764	88.5	6
Q3TIR3	Synembryn-A (Protein Ric-8A)	Ric8a Ric8	4	2	6.22642	59.8	4
E9QAU4	Enhancer trap locus 4	Etl4	5	4	2.05308	218.3	5
Q9JJN5	Carboxypeptidase N catalytic chain (CPN) (EC 3.4.17.3) (Carboxypeptidase N polypeptide 1) (Carboxypeptidase N small subunit)	Cpn1	3	3	6.78337	51.8	3
P05533	Lymphocyte antigen 6A-2/6E-1 (Ly-6A.2/Ly-6E.1) (Stem cell antigen 1) (SCA-1) (T-cell-activating protein) (TAP)	Ly6a Ly6	1	1	15.6716	14.4	1
A4QPD3	Proto-oncogene c-Rel (Reticuloendotheliosis oncogene)	Rel mCG_8770	2	1	2.55102	65.1	2
Q8K2Y7	39S ribosomal protein L47, mitochondrial (L47mt) (MRP-L47)	Mrpl47	1	1	4.36508	29.7	1
Q8K2Q0	COMM domain-containing protein 9	Commd9	6	6	37.8788	21.8	8
Q9D7X8	Gamma-glutamylcyclotransferase (EC 4.3.2.9)	Ggct	1	1	5.85106	21.2	1
Q6ZQ58	La-related protein 1 (La ribonucleoprotein domain family member 1)	Larp1 Kiaa0731 Larp	1	1	1.1194	121.1	1
B2RXC1	Trafficking protein particle complex subunit 11	Trappc11	3	3	2.38305	128.3	3
Q60709	Amyloid-like protein 2 (Amyloid-like protein 2, isoform 751)	Aplp2 APLP2	3	2	4.39414	85.2	4
A0A087WP33	Autophagy-related protein 9 (Fragment)	Atg9a	1	1	1.06257	95.2	1
Q5SNZ0	Girdin (Akt phosphorylation enhancer) (APE) (Coiled-coil domain-containing protein 88A) (G alpha-interacting vesicle-associated protein) (GIV) (Girders of actin filament) (Hook-related protein 1) (HkRP1)	Ccdc88a Grdn Kiaa1212	3	3	1.70849	215.8	3
Q8C460	ERI1 exoribonuclease 3 (EC 3.1.-.-) (Prion interactor 1) (Prion protein-interacting protein)	Eri3 Pint1 Prnpip Prnpip1	1	1	2.67062	37.2	1
Q8K479	Complement C1q tumor necrosis factor-related protein 5	C1qtnf5 Ctrp5	1	1	5.34979	25.4	2
Q6PE15	Mycophenolic acid acyl-glucuronide esterase, mitochondrial (EC 3.1.1.93) (Alpha/beta hydrolase domain-containing protein 10) (Abhydrolase domain-containing protein 10)	Abhd10	2	2	6.39731	33	2
Q8BX80	Cytosolic endo-beta-N-acetylglucosaminidase (ENGase) (EC 3.2.1.96)	Engase	3	3	3.95095	82.9	3
P41438	Folate transporter 1 (Intestinal folate carrier 1) (IFC-1) (Reduced folate carrier 1) (RFC-1) (RFC1) (Solute carrier family 19 member 1)	Slc19a1	1	1	2.14844	58.1	1
Q64705	Upstream stimulatory factor 2 (Major late transcription factor 2) (Upstream transcription factor 2)	Usf2	2	2	6.93642	36.9	2
Q3UR97	Sorting nexin-21	Snx21	1	1	4.40771	40.3	1
Q8CBC4	Consortin	Cnst	1	1	1.26582	76.8	1
Q9JJX6	P2X purinoceptor 4 (P2X4) (ATP receptor) (Purinergic receptor)	P2rx4 P2x4	2	2	3.86598	43.4	2
Q9CR10	Oxidoreductase-like domain-containing protein 1	Oxld1	1	1	3.9801	22.2	1
Q8R4W6	Procollagen C-endopeptidase enhancer 2 (Procollagen COOH-terminal proteinase enhancer 2) (PCPE-2) (Procollagen C-proteinase enhancer 2)	Pcolce2 Pcpe2	1	1	3.62319	45.4	1
Q9EQ08	Heparan N-sulfatase (N-sulfoglucosamine sulfohydrolase (Sulfamidase), isoform CRA_b) (N-sulfoglucosamine sulfohydrolase (sulfamidase))	Sgsh mCG_15050	3	3	6.1753	56.7	3
Q8BRK9	Alpha-mannosidase 2x (EC 3.2.1.114) (Alpha-mannosidase IIx) (Man IIx) (Mannosidase alpha class 2A member 2) (Mannosyl-oligosaccharide 1,3-1,6-alpha-mannosidase)	Man2a2 Mana2x	3	2	3.03819	130.6	4
Q6IR34	G-protein-signaling modulator 1 (Activator of G-protein signaling 3)	Gpsm1 Ags3 C10a	1	1	1.63447	74.3	1
Q8BK30	NADH dehydrogenase [ubiquinone] flavoprotein 3, mitochondrial (Complex I-9kD) (CI-9kD) (NADH-ubiquinone oxidoreductase 9 kDa subunit)	Ndufv3	2	1	18.2692	11.8	4
Q3U0B3	Dehydrogenase/reductase SDR family member 11 (17-beta-hydroxysteroid dehydrogenase) (3-beta-hydroxysteroid 3-dehydrogenase) (EC 1.1.1.270) (Estradiol 17-beta-dehydrogenase) (EC 1.1.1.62) (Short-chain dehydrogenase/reductase family 24C member 1)	Dhrs11 Sdr24c1	2	2	9.23077	28.3	2
A0A0R4J0J0	Palmdelphin	Palmd	2	2	2.72232	62.6	3
Q8VDT9	39S ribosomal protein L50, mitochondrial (L50mt) (MRP-L50)	Mrpl50	3	3	14.4654	18.2	4
Q8BMQ8	Vacuolar fusion protein MON1 homolog B	Mon1b Kiaa0872	1	1	3.25497	60	1
Q8JZY2	COMM domain-containing protein 10 (Down-regulated in W/WV mouse stomach 2) (mDRWMS2)	Commd10	2	2	9.90099	22.8	2
Q8K4X7	1-acyl-sn-glycerol-3-phosphate acyltransferase delta (EC 2.3.1.51) (1-acylglycerol-3-phosphate O-acyltransferase 4) (1-AGP acyltransferase 4) (1-AGPAT 4) (Lysophosphatidic acid acyltransferase delta) (LPAAT-delta)	Agpat4	1	1	2.38095	43.8	1
Q9CYL5	Golgi-associated plant pathogenesis-related protein 1 (GAPR-1) (Golgi-associated PR-1 protein) (Glioma pathogenesis-related protein 2) (GliPR 2)	Glipr2 Gapr1	2	2	16.8831	17.1	4
Q91WR3	Activating signal cointegrator 1 complex subunit 2 (ASC-1 complex subunit p100) (Trip4 complex subunit p100)	Ascc2 Asc1p100	1	1	1.33511	85.6	1
Q04592	Proprotein convertase subtilisin/kexin type 5 (EC 3.4.21.-) (Proprotein convertase 5) (PC5) (Proprotein convertase 6) (PC6) (Subtilisin-like proprotein convertase 6) (SPC6) (Subtilisin/kexin-like protease PC5)	Pcsk5	2	1	0.799148	209.1	2
E9Q2I3	Protein phosphatase 1M	Ppm1m	1	1	2.81385	51.2	1
Q9CZN8	Glutamyl-tRNA(Gln) amidotransferase subunit A, mitochondrial (Glu-AdT subunit A) (EC 6.3.5.7) (Glutaminyl-tRNA synthase-like protein 1)	Qrsl1	2	2	5.90476	56.7	2
Q6PGL7	WASH complex subunit 2	Washc2 D6Wsu116e Fam21 Kiaa0592	2	2	1.87406	145.2	2
O35066	Kinesin-like protein KIF3C	Kif3c	1	1	1.13065	89.9	1
S4R270	Bridging integrator 2	Bin2	2	2	4.15842	54.7	2
P46414	Cyclin-dependent kinase inhibitor 1B (Cyclin-dependent kinase inhibitor p27) (p27Kip1)	Cdkn1b	2	2	10.6599	22.2	2
P70269	Cathepsin E (EC 3.4.23.34)	Ctse	1	1	2.01511	42.9	2
F6WR04	Cathepsin S	Ctss	1	1	3.81232	38.6	1
A0A0A0MQF5	Deubiquitinase OTUD6B	Otud6b	1	1	3.07692	37.2	1
Q6PAT0	Probable inactive tRNA-specific adenosine deaminase-like protein 3 (tRNA-specific adenosine-34 deaminase subunit ADAT3)	Adat3	1	1	2.5788	37.5	1
A6H630	Damage-control phosphatase ARMT1 (EC 3.1.3.-) (Acidic residue methyltransferase 1) (Protein-glutamate O-methyltransferase) (EC 2.1.1.-) (Sugar phosphate phosphatase ARMT1)	Armt1	1	1	2.2779	50.5	1
A6X919	Probable C-mannosyltransferase DPY19L1 (EC 2.4.1.-) (Dpy-19-like protein 1) (Protein dpy-19 homolog 1)	Dpy19l1	1	1	1.87668	84.1	1
Q9QXP7	Complement C1q tumor necrosis factor-related protein 1 (Putative secreted protein ZSIG37)	C1qtnf1 Zsig37	1	1	3.20285	32	1
Q8BX94	Oxysterol-binding protein-related protein 2 (ORP-2) (OSBP-related protein 2)	Osbpl2	2	2	5.78512	55.3	2
Q921W4	Quinone oxidoreductase-like protein 1 (EC 1.-.-.-) (Quinone oxidoreductase homolog 1) (QOH-1) (Zeta-crystallin homolog)	Cryzl1	3	3	8.33333	38.7	4
Q80W68	Kin of IRRE-like protein 1 (Kin of irregular chiasm-like protein 1) (Nephrin-like protein 1)	Kirrel1 Kirrel Neph1	1	1	1.52091	87.1	1
P17183	Gamma-enolase (EC 4.2.1.11) (2-phospho-D-glycerate hydro-lyase) (Enolase 2) (Neural enolase) (Neuron-specific enolase) (NSE)	Eno2 Eno-2	3	1	9.447	47.3	52
A0A0R4J0U7	COMM domain-containing protein 5	Commd5	1	1	3.125	24.5	1
Q3UW64	Bifunctional UDP-N-acetylglucosamine 2-epimerase/N-acetylmannosamine kinase (UDP-N-acetylglucosamine 2-epimerase/N-acetylmannosamine kinase) (EC 5.1.3.14)	Gne	5	5	5.71049	82.8	6
Q63810	Calcineurin subunit B type 1 (Protein phosphatase 2B regulatory subunit 1) (Protein phosphatase 3 regulatory subunit B alpha isoform 1)	Ppp3r1 Cnb	2	2	12.9412	19.3	2
Q9CVD2	Ataxin-3 (EC 3.4.19.12) (Machado-Joseph disease protein 1 homolog)	Atxn3 Mjd	1	1	2.8169	40.5	1
P60670	Nuclear protein localization protein 4 homolog (Protein NPL4)	Nploc4 Kiaa1499 Npl4	4	4	8.05921	68	7
Q69ZX8	Actin-binding LIM protein 3 (abLIM-3) (Actin-binding LIM protein family member 3)	Ablim3 Kiaa0843	1	1	1.90616	77.6	2
Q9CWS4	Integrator complex subunit 11 (Int11) (EC 3.1.27.-) (Cleavage and polyadenylation-specific factor 3-like protein) (CPSF3-like protein)	Ints11 Cpsf3l	2	2	3.16667	67.8	2
Q8K2P6	Rieske domain-containing protein	Rfesd	1	1	5.09554	18	1
Q60989	E3 ubiquitin-protein ligase XIAP (EC 2.3.2.27) (Baculoviral IAP repeat-containing protein 4) (IAP homolog A) (Inhibitor of apoptosis protein 3) (IAP-3) (mIAP-3) (mIAP3) (RING-type E3 ubiquitin transferase XIAP) (X-linked inhibitor of apoptosis protein) (X-linked IAP)	Xiap Aipa Api3 Birc4 Miha	1	1	2.01613	56	1
E9QL65	Conserved oligomeric Golgi complex subunit 3	Cog3	2	2	2.29469	94.1	2
G3UXA6	Polypyrimidine tract-binding protein 3	Ptbp3 Rod1	3	1	4.51264	59.7	4
P35737	Class II histocompatibility antigen, M beta 1 chain (H2-M beta 1 chain)	H2-DMb1 H-2Mb1 Mb	1	1	3.83142	28.9	1
Q91WE1	Sorting nexin-15	Snx15	1	1	2.96736	37.7	1
Q91WE2	PSME3-interacting protein (NEFA-interacting nuclear protein NIP30) (PA28G-interacting protein)	Fam192a Nip30	1	1	3.93701	28.7	1
F8WI30	Sorting nexin-7	Snx7	5	5	12.1348	50.8	5
E9QNQ2	Serine/threonine-protein phosphatase 6 regulatory ankyrin repeat subunit B	Ankrd44	3	3	3.95648	109.3	4
Q921Q3	Chitobiosyldiphosphodolichol beta-mannosyltransferase (EC 2.4.1.142) (Asparagine-linked glycosylation protein 1 homolog) (Beta-1,4-mannosyltransferase) (GDP-Man:GlcNAc2-PP-dolichol mannosyltransferase) (GDP-mannose-dolichol diphosphochitobiose mannosyltransferase)	Alg1	1	1	1.65975	54.4	1
P58544	BTB/POZ domain-containing protein 1 (Glucose signal-repressing protein)	Btbd1 Gsrp	1	1	2.04918	53.2	1
Q60520	Paired amphipathic helix protein Sin3a (Histone deacetylase complex subunit Sin3a) (Transcriptional corepressor Sin3a)	Sin3a Kiaa4126	2	2	1.56986	145	2
Q8R4R6	Nucleoporin NUP35 (35 kDa nucleoporin) (Mitotic phosphoprotein 44) (MP-44) (Nuclear pore complex protein Nup53) (Nucleoporin NUP53)	Nup35 Mp44 Nup53	2	2	6.46154	34.8	2
P35922	Synaptic functional regulator FMR1 (Fragile X mental retardation protein 1 homolog) (FMRP) (Protein FMR-1) (mFmr1p)	Fmr1 Fmr-1	4	3	6.35179	68.9	4
Q3UVL4	Vacuolar protein sorting-associated protein 51 homolog (Protein fat-free homolog)	Vps51 Ffr	1	1	2.68542	86.1	1
B1AT82	MCG6846, isoform CRA_c (Phosphoribosyl pyrophosphate synthase-associated protein 1)	Prpsap1 mCG_6846	5	4	13.5065	42.4	6
G3X9H7	Metastasis suppressor 1, isoform CRA_e (Protein MTSS 1)	Mtss1 mCG_116708	1	1	1.18577	82.4	1
Q9EPK5	WW domain-containing transcription regulator protein 1 (Transcriptional coactivator with PDZ-binding motif)	Wwtr1 Taz	1	1	2.27848	43.6	1
Q6W8Q3	Purkinje cell protein 4-like protein 1 (PCP4-like protein 1)	Pcp4l1	1	1	20.5882	7.5	1
Q6PCN7	Helicase-like transcription factor (EC 2.3.2.27) (EC 3.6.4.-) (P113) (RING-type E3 ubiquitin transferase HLTF) (SWI/SNF-related matrix-associated actin-dependent regulator of chromatin subfamily A member 3) (Sucrose nonfermenting protein 2-like 3) (TNF-response element-binding protein)	Hltf Smarca3 Snf2l3 Zbu1	3	2	2.69192	113.2	3
Q3UI43	BRISC and BRCA1-A complex member 1 (Mediator of RAP80 interactions and targeting subunit of 40 kDa) (New component of the BRCA1-A complex)	Babam1 Merit40 Nba1	3	3	9.60961	36.8	3
Q9D753	Exosome complex component RRP43 (Exosome component 8) (Ribosomal RNA-processing protein 43)	Exosc8 Rrp43	4	4	19.2029	29.9	5
Q64373	Bcl-2-like protein 1 (Bcl2-L-1) (Apoptosis regulator Bcl-X)	Bcl2l1 Bcl2l Bclx	2	2	7.29614	26.1	2
E9Q5K9	YTH domain-containing protein 1	Ythdc1 Kiaa1966	3	3	3.26087	85.6	3
O35930	Platelet glycoprotein Ib alpha chain (GP-Ib alpha) (GPIb-alpha) (GPIbA) (Glycoprotein Ibalpha) (CD antigen CD42b) [Cleaved into: Glycocalicin]	Gp1ba	2	2	2.86104	80	2
Q9CYI4	Putative RNA-binding protein Luc7-like 1	Luc7l	4	1	8.89488	43.9	7
Q80VQ1	Leucine-rich repeat-containing protein 1	Lrrc1	3	1	7.44275	59.4	3
O88632	Semaphorin-3F (Semaphorin IV) (Sema IV)	Sema3f	2	2	2.80255	88.5	2
Q8BG94	COMM domain-containing protein 7	Commd7	2	2	10	22.6	2
P49962	Signal recognition particle 9 kDa protein (SRP9)	Srp9	3	3	27.907	10.2	3
P49710	Hematopoietic lineage cell-specific protein (Hematopoietic cell-specific LYN substrate 1) (LckBP1)	Hcls1 Hs1	2	2	3.7037	54.2	2
Q5SWN2	Replication protein A subunit	Rpa1	4	4	7.76398	71.4	4
D3Z3L3	Tripartite motif-containing 12C	Trim12c	1	1	1.81087	57.8	1
Q06318	Uteroglobin (Clara cell 17 kDa protein) (Clara cell phospholipid-binding protein) (CCPBP) (Clara cells 10 kDa secretory protein) (CC10) (PCB-binding protein) (Secretoglobin family 1A member 1)	Scgb1a1 Cc10 Ugb Utg	1	1	10.4167	10.5	2
P03995	Glial fibrillary acidic protein (GFAP)	Gfap	3	1	6.04651	49.9	28
L8AZD2	Myotubularin-related protein 6 (Phosphatidylinositol-3,5-bisphosphate 3-phosphatase) (EC 3.1.3.95) (Phosphatidylinositol-3-phosphate phosphatase) (EC 3.1.3.64)	Mtmr6	2	2	3.05344	75.7	2
Q9WUB0	RanBP-type and C3HC4-type zinc finger-containing protein 1 (EC 2.3.2.31) (Heme-oxidized IRP2 ubiquitin ligase 1 homolog) (HOIL-1) (RING-type E3 ubiquitin transferase HOIL-1) (UbcM4-interacting protein 28) (Ubiquitin-conjugating enzyme 7-interacting protein 3)	Rbck1 Rbck Ubce7ip3 Uip28	3	3	7.48031	57.5	3
Q99JT1	Glutamyl-tRNA(Gln) amidotransferase subunit B, mitochondrial (Glu-AdT subunit B) (EC 6.3.5.-) (Cytochrome c oxidase assembly factor PET112 homolog)	Gatb Pet112 Pet112l	2	2	6.10413	62.1	2
Q9ERN0	Secretory carrier-associated membrane protein 2 (Secretory carrier membrane protein 2)	Scamp2	5	5	15.8055	36.4	6
G5E8U9	BCL2/adenovirus E1B 19 kDa protein-interacting protein 2 (BCL2/adenovirus E1B interacting protein 1, NIP2, isoform CRA_c)	Bnip2 mCG_2934	2	2	4.02299	39.8	2
Q9CQV4	Reticulophagy regulator 3	Retreg3 Fam134c	2	2	5.15021	51.6	2
A0A0R4J0S8	Uroplakin-3b	Upk3b	1	1	4.34783	30.3	1
Q8BXZ1	Protein disulfide-isomerase TMX3 (EC 5.3.4.1) (Thioredoxin domain-containing protein 10) (Thioredoxin-related transmembrane protein 3)	Tmx3 Kiaa1830 Txndc10	4	4	8.11404	51.8	4
B1AUN2	Eukaryotic translation initiation factor 2B, subunit 3 (MCG14442)	Eif2b3 mCG_14442	2	2	4.64602	50.5	2
Q8C3F2	Constitutive coactivator of PPAR-gamma-like protein 2 (Protein FAM120C)	Fam120c ORF34	1	1	1.00825	119.6	1
Q9Z0S1	3'(2'),5'-bisphosphate nucleotidase 1 (EC 3.1.3.7) (Bisphosphate 3'-nucleotidase 1) (PAP-inositol 1,4-phosphatase) (PIP)	Bpnt1	8	1	34.4156	33.2	13
G3X9M0	28S ribosomal protein S29, mitochondrial	Dap3	7	7	17.6768	45.3	9
Q9JHI7	Exosome complex component RRP45 (Autoantigen PM/Scl 1) (Exosome component 9) (P75 polymyositis-scleroderma overlap syndrome-associated autoantigen) (Polymyositis/scleroderma autoantigen 1) (Polymyositis/scleroderma autoantigen 75 kDa) (PM/Scl-75)	Exosc9 Pmscl1	1	1	2.28311	48.9	1
Q0KL01	UBX domain-containing protein 2B (NSFL1 cofactor p37) (p97 cofactor p37)	Ubxn2b	1	1	3.62538	37.4	1
E9Q401	Ryanodine receptor 2 (RYR-2) (RyR2) (Cardiac muscle ryanodine receptor) (Cardiac muscle ryanodine receptor-calcium release channel) (Type 2 ryanodine receptor)	Ryr2	1	1	0.201369	564.5	1
A0A0A0MQD5	SH3 and multiple ankyrin repeat domains protein 3	Shank3	3	3	2.04986	192.1	3
Q8BZH0	Zinc transporter ZIP13 (Solute carrier family 39 member 13) (Zrt- and Irt-like protein 13) (ZIP-13)	Slc39a13 Zip13	1	1	2.49307	38.5	1
Q9DCI9	39S ribosomal protein L32, mitochondrial (L32mt) (MRP-L32) (Heart-expressed gene 1 protein)	Mrpl32 Heg1	1	1	6.41711	21.7	1
Q8K0D0	Cyclin-dependent kinase 17 (EC 2.7.11.22) (Cell division protein kinase 17) (PCTAIRE-motif protein kinase 2) (Serine/threonine-protein kinase PCTAIRE-2)	Cdk17 Pctaire2 Pctk2	2	1	4.0153	59.5	3
Q9QY93	dCTP pyrophosphatase 1 (EC 3.6.1.12) (Deoxycytidine-triphosphatase 1) (dCTPase 1) (RS21-C6)	Dctpp1 Tdrg-TL1	1	1	5.29412	18.8	1
Q99LM2	CDK5 regulatory subunit-associated protein 3	Cdk5rap3	5	5	12.7237	57	5
A0A0R4J049	Protein arginine N-methyltransferase 5 (EC 2.1.1.-)	Prmt5	5	5	6.27943	72.7	5
Q80SY6	Adenosine deaminase-like protein (EC 3.5.4.-)	Adal	1	1	2.5	41	1
A0A1D5RM83	IQ motif and SEC7 domain-containing protein 1	Iqsec1	3	1	1.71265	117.9	3
Q9QY36	N-alpha-acetyltransferase 10 (EC 2.3.1.255) (N-terminal acetyltransferase complex ARD1 subunit homolog A) (NatA catalytic subunit Naa10)	Naa10 Ard1 Ard1a Te2	2	1	9.3617	26.5	2
Q62277	Synaptophysin (BM89 antigen) (Major synaptic vesicle protein p38)	Syp	2	2	6.36943	34	2
Q8K1G2	Limbin	Evc2 Lbn	2	2	1.55738	137.6	2
P70428	Exostosin-2 (EC 2.4.1.224) (EC 2.4.1.225) (Glucuronosyl-N-acetylglucosaminyl-proteoglycan/N-acetylglucosaminyl-proteoglycan 4-alpha-N-acetylglucosaminyltransferase) (Multiple exostoses protein 2 homolog)	Ext2	1	1	0.97493	82	1
Q91XY8	Protocadherin gamma A11 (Protocadherin gamma subfamily A, 11)	Pcdhga11	1	1	0.96463	101.1	1
Q91YR5	eEF1A lysine and N-terminal methyltransferase (eEF1A-KNMT) (Methyltransferase-like protein 13) [Includes: eEF1A lysine methyltransferase (EC 2.1.1.-); eEF1A N-terminal methyltransferase (EC 2.1.1.-)]	EEF1AKNMT Kiaa0859 Mettl13	1	1	2.149	78.7	1
A0A1L1SQU7	FAT atypical cadherin 1	Fat1	10	10	2.2605	511.9	10
P28662	Brain protein I3	Bri3	1	1	5.6	13.6	1
Q5XKN4	Protein jagunal homolog 1	Jagn1	1	1	6.55738	21.1	1
Q00993	Tyrosine-protein kinase receptor UFO (EC 2.7.10.1) (Adhesion-related kinase)	Axl Ark Ufo	3	3	3.94144	98.1	4
Q8BL86	Metallo-beta-lactamase domain-containing protein 2 (EC 3.-.-.-)	Mblac2	4	4	16.4875	31.2	4
Q91Z31	Polypyrimidine tract-binding protein 2 (Brain-enriched polypyrimidine tract-binding protein) (Brain-enriched PTB) (Neural polypyrimidine tract-binding protein) (RRM-type RNA-binding protein brPTB)	Ptbp2 Brptb Nptb	1	1	1.88324	57.5	1
A0A0A6YVS4	Immunoglobulin heavy variable 5-9-1 (Fragment)	Ighv5-9-1	1	1	8.73016	14.2	1
Q8C7B6	F-box and leucine-rich protein 22	Fbxl22	1	1	3.81356	26.3	1
Q3UBZ5	MIF4G domain-containing protein	Mif4gd	2	2	10.3604	25.5	4
P97452	Ribosome biogenesis protein BOP1 (Block of proliferation 1 protein)	Bop1 Kiaa0124	2	2	2.45902	82.5	2
B1AQD4	Ras-related protein Rab-34 (Fragment)	Rab34	3	3	8.30189	30	3
Q8R1G6	PDZ and LIM domain protein 2 (PDZ-LIM protein mystique)	Pdlim2	2	2	4.87106	37.7	2
V9GXQ2	Predicted gene 17087	Gm17087	3	1	14.7436	17.6	25
Q9JKY0	CCR4-NOT transcription complex subunit 9 (Cell differentiation protein RQCD1 homolog) (Rcd-1) (EPO-induced protein FL10)	Cnot9 Rcd1 Rqcd1	1	1	4.01338	33.6	1
Q61140	Breast cancer anti-estrogen resistance protein 1 (CRK-associated substrate) (p130cas)	Bcar1 Cas Crkas	3	3	3.08924	94.2	3
Q68FL4	Putative adenosylhomocysteinase 3 (AdoHcyase 3) (EC 3.3.1.1) (Long-IRBIT) (S-adenosyl-L-homocysteine hydrolase 3) (S-adenosylhomocysteine hydrolase-like protein 2)	Ahcyl2	10	1	16.4763	66.9	16
Q8C165	N-fatty-acyl-amino acid synthase/hydrolase PM20D1 (EC 3.5.1.-) (EC 4.3.-.-) (Peptidase M20 domain-containing protein 1)	Pm20d1	1	1	1.39165	55.6	1
Q99ME2	WD repeat-containing protein 6 (mWDR6)	Wdr6	1	1	0.622222	121.8	1
Q80VJ2	Steroid receptor RNA activator 1 (Steroid receptor RNA activator protein) (SRAP)	Sra1	2	1	5.60345	25.5	3
B2RUJ5	Amyloid-beta A4 precursor protein-binding family A member 1 (Adapter protein X11alpha) (Neuron-specific X11 protein) (Neuronal Munc18-1-interacting protein 1) (Mint-1)	Apba1 Mint1 X11	1	1	1.54394	92.9	1
A0A0R4J0R1	Vesicle-associated membrane protein 8 (Vesicle-associated membrane protein 8, isoform CRA_b)	Vamp8 mCG_129303	2	2	16.8317	11.4	2
P39039	Mannose-binding protein A (MBP-A) (Mannan-binding protein) (Ra-reactive factor polysaccharide-binding component p28B) (RaRF p28B)	Mbl1	1	1	3.76569	25.4	1
P47856	Glutamine--fructose-6-phosphate aminotransferase [isomerizing] 1 (EC 2.6.1.16) (D-fructose-6-phosphate amidotransferase 1) (Glutamine:fructose-6-phosphate amidotransferase 1) (GFAT 1) (GFAT1) (Hexosephosphate aminotransferase 1)	Gfpt1 Gfpt	3	1	3.5868	78.5	3
Q9CZP5	Mitochondrial chaperone BCS1 (BCS1-like protein)	Bcs1l	6	6	15.311	47.4	9
Q3UQ44	Ras GTPase-activating-like protein IQGAP2	Iqgap2	4	2	2.22222	180.4	4
P51830	Adenylate cyclase type 9 (EC 4.6.1.1) (ATP pyrophosphate-lyase 9) (Adenylate cyclase type IX) (Adenylyl cyclase 9) (AC9) (Adenylyl cyclase type 10) (ACTP10)	Adcy9	1	1	0.665188	150.9	1
A8Y5H7	SEC14-like protein 1	Sec14l1 Kiaa4251	1	1	1.25874	81.2	1
O88351	Inhibitor of nuclear factor kappa-B kinase subunit beta (I-kappa-B-kinase beta) (IKK-B) (IKK-beta) (IkBKB) (EC 2.7.11.10) (I-kappa-B kinase 2) (IKK2) (Nuclear factor NF-kappa-B inhibitor kinase beta) (NFKBIKB)	Ikbkb Ikkb	2	2	3.17041	86.6	2
Q62293	T-cell-specific guanine nucleotide triphosphate-binding protein 1 (EC 3.6.5.-) (Interferon-gamma-inducible GTPase Ifggb5)	Tgtp1 Ifggb5 Irgb6 Mg21	1	1	1.68675	47.1	1
P63154	Crooked neck-like protein 1 (Crooked neck homolog)	Crnkl1	1	1	1.73913	83.4	1
E9Q4K0	Actin-binding LIM protein 2	Ablim2	1	1	1.20482	73.6	1
Q9JI11	Serine/threonine-protein kinase 4 (EC 2.7.11.1) (Mammalian STE20-like protein kinase 1) (MST-1) (STE20-like kinase MST1) [Cleaved into: Serine/threonine-protein kinase 4 37kDa subunit (MST1/N); Serine/threonine-protein kinase 4 18kDa subunit (MST1/C)]	Stk4 Mst1	2	1	3.90144	55.5	2
Q9Z0H3	SWI/SNF-related matrix-associated actin-dependent regulator of chromatin subfamily B member 1 (BRG1-associated factor 47) (BAF47) (Integrase interactor 1 protein) (SNF5 homolog) (mSNF5)	Smarcb1 Baf47 Ini1 Snf5l1	2	2	7.01299	44.1	2
Q8R3L2	Transcription factor 25 (TCF-25) (Nuclear localized protein 1)	Tcf25 D8Ertd325e Nulp1	2	2	2.95858	76.6	2
Q8R0I4	TM2 domain-containing protein 2	Tm2d2	1	1	5.16432	22.8	1
Q9Z2N8	Actin-like protein 6A (53 kDa BRG1-associated factor A) (Actin-related protein Baf53a) (BRG1-associated factor 53A) (BAF53A)	Actl6a Actl6 Baf53a	3	3	7.22611	47.4	3
E9PYV1	Glucocorticoid receptor	Nr3c1	1	1	1.13493	87.3	1
Q8BZW8	NHL repeat-containing protein 2	Nhlrc2	7	7	12.1379	78.4	8
Q8VC42	Regulator of MON1-CCZ1 complex (Colon cancer-associated protein Mic1) (Mic-1)	Rmc1 Mic1 Wdr98	1	1	1.67428	74.9	1
E9PX59	Sterile alpha motif domain-containing protein 9-like	Samd9l	2	1	0.886637	182.1	2
A7UAK5	6-phosphofructo-2-kinase/fructose-2, 6-biphosphatase 3 splice variant 2 (EC 2.7.1.105) (EC 3.1.3.46) (6-phosphofructo-2-kinase/fructose-2,6-biphosphatase 3)	Pfkfb3	4	3	6.48649	63.6	5
E9QPI5	Sister chromatid cohesion protein PDS5 homolog A	Pds5a	5	2	3.75375	150.1	5
P97864	Caspase-7 (CASP-7) (EC 3.4.22.60) (Apoptotic protease Mch-3) (Cysteine protease LICE2) [Cleaved into: Caspase-7 subunit p20; Caspase-7 subunit p11]	Casp7 Lice2 Mch3	1	1	2.31023	34	1
O35640	Annexin A8 (Annexin VIII) (Annexin-8)	Anxa8 Anx8	1	1	2.75229	36.7	1
Q9DBR1	5'-3' exoribonuclease 2 (EC 3.1.13.-) (Protein Dhm1)	Xrn2 Dhm1	2	2	3.36488	108.6	3
Q9CQ06	39S ribosomal protein L24, mitochondrial (L24mt) (MRP-L24)	Mrpl24	2	2	10.6481	24.9	3
Q6P2B1	Transportin-3	Tnpo3	4	4	5.41712	104.1	5
Q6NXI6	Regulation of nuclear pre-mRNA domain-containing protein 2	Rprd2 Kiaa0460	1	1	0.816882	156.5	1
Q8K0Y2	Keratin, type I cuticular Ha3-I (Hair keratin, type I Ha3-I) (Keratin-33A) (K33A)	Krt33a	12	1	29.9505	46.1	16
B2RXC8	3222402P14Rik protein (MCG15724, isoform CRA_b) (Protein phosphatase 2, regulatory subunit B'', alpha)	Ppp2r3a 3222402P14Rik mCG_15724	2	2	1.3913	130.2	2
Q6NXZ5	ADP-ribosylation factor-like 5B (ADP-ribosylation factor-like protein 5B)	Arl5b Arl8 mCG_21343	1	1	4.44444	20.5	1
G3X983	T cell activation inhibitor, mitochondrial	Tcaim D9Ertd402e	2	2	3.92927	58.5	2
Q3TCX3	KH homology domain-containing protein 4 (Brings lots of money 7) (Pre-mRNA splicing factor protein Khdc4)	Khdc4 Blom7 Kiaa0907	1	1	1.47059	64.5	1
Q6P9J5	KN motif and ankyrin repeat domain-containing protein 4 (Ankyrin repeat domain-containing protein 38)	Kank4 Ankrd38	1	1	1.08268	110.3	1
Q7TQE6	Macoilin (Brain-specific adapter protein C61) (Macoilin-1) (Transmembrane protein 57)	Maco1 Tmem57	1	1	1.20482	76	1
D3Z286	Transmembrane protein with metallophosphoesterase domain	Tmppe Glb1	2	2	5.36913	49.4	2
Q8VC03	Echinoderm microtubule-associated protein-like 3 (EMAP-3)	Eml3	3	3	3.56745	95.6	3
A0A0R4J124	SRSF protein kinase 2 (Serine/arginine-rich protein specific kinase 2, isoform CRA_a)	Srpk2 mCG_4527	2	2	2.93255	76.8	2
Q9ERA6	Tuftelin-interacting protein 11 (Septin and tuftelin-interacting protein 1) (STIP-1) (Tuftelin-interacting protein 39)	Tfip11 Stip Tip39	2	2	3.10263	96.2	2
P43883	Perilipin-2 (Adipophilin) (Adipose differentiation-related protein) (ADRP)	Plin2 Adfp Adrp	1	1	1.88235	46.6	1
Q3U2V3	8-oxo-dGDP phosphatase NUDT18 (EC 3.6.1.58) (2-hydroxy-dADP phosphatase) (7,8-dihydro-8-oxoguanine phosphatase) (MutT homolog 3) (Nucleoside diphosphate-linked moiety X motif 18) (Nudix motif 18)	Nudt18 Mth3	1	1	2.78638	35.7	1
B2RXQ2	Ppfia1 protein (Protein tyrosine phosphatase, receptor type, f polypeptide (PTPRF),-interacting protein (liprin), alpha 1)	Ppfia1	5	5	3.5545	142.6	6
Q80VD1	Protein FAM98B	Fam98b	3	2	9.55711	45.3	3
Q9D1B9	39S ribosomal protein L28, mitochondrial (L28mt) (MRP-L28)	Mrpl28	3	3	8.56031	30.2	3
P27005	Protein S100-A8 (Calgranulin-A) (Chemotactic cytokine CP-10) (Leukocyte L1 complex light chain) (Migration inhibitory factor-related protein 8) (MRP-8) (p8) (Pro-inflammatory S100 cytokine) (S100 calcium-binding protein A8)	S100a8 Caga Mrp8	2	2	30.3371	10.3	2
Q9ES00	Ubiquitin conjugation factor E4 B (EC 2.3.2.27) (RING-type E3 ubiquitin transferase E4 B) (Ubiquitin fusion degradation protein 2)	Ube4b Ufd2 Ufd2a	1	1	0.767263	133.2	1
Q8BFX0	DNA-directed RNA polymerases I, II, and III subunit RPABC4	Polr2k	1	1	7.07071	11.7	1
A0A0R4J0U5	ATP-binding cassette sub-family D member 2 (ATP-binding cassette, sub-family D (ALD), member 2)	Abcd2 mCG_21309	4	4	5.93792	83.4	5
Q8C0J2	Autophagy-related protein 16-1 (APG16-like 1)	Atg16l1 Apg16l	3	3	4.28336	68.1	3
Q9D289	Trafficking protein particle complex subunit 6B (TRAPP complex subunit 6B)	Trappc6b	2	2	10.7595	17.9	2
F8VPV0	Pericentrin	Pcnt	3	2	0.720165	331.1	5
Q8K337	Type II inositol 1,4,5-trisphosphate 5-phosphatase (EC 3.1.3.36) (Inositol polyphosphate-5-phosphatase B) (Phosphoinositide 5-phosphatase) (5PTase)	Inpp5b	2	2	1.71198	112.7	2
P58404	Striatin-4 (Zinedin)	Strn4 Zin	2	1	2.76316	81.6	3
G5E8R1	Tropomyosin 1, alpha, isoform CRA_j (Tropomyosin alpha-1 chain)	Tpm1 mCG_1234	24	0	68.1452	28.5	200
G3X8X3	Large neutral amino acids transporter small subunit 3 (MCG3561, isoform CRA_c)	Slc43a1 mCG_3561	1	1	1.81219	67.2	1
A6H6A9	Rab GTPase-activating protein 1-like	Rabgap1l Hhl Kiaa0471	1	1	1.22699	92.3	1
Q8CIV8	Tubulin-specific chaperone E (Tubulin-folding cofactor E)	Tbce	2	2	6.10687	59	2
Q80XN0	D-beta-hydroxybutyrate dehydrogenase, mitochondrial (EC 1.1.1.30) (3-hydroxybutyrate dehydrogenase) (BDH)	Bdh1 Bdh	1	1	2.62391	38.3	1
Q91WK5	Glycine cleavage system H protein, mitochondrial (Lipoic acid-containing protein)	Gcsh	1	1	5.88235	18.6	2
Q9D2Q2	Probable tRNA (uracil-O(2)-)-methyltransferase (EC 2.1.1.211) (Methyltransferase-like protein 19)	Trmt44 Mettl19	1	1	1.26227	79.8	1
A0A286YDB8	Elongator complex protein 3 (EC 2.3.1.48)	Elp3	2	2	4.15913	63	3
Q80T21	ADAMTS-like protein 4 (ADAMTSL-4) (Thrombospondin repeat-containing protein 1)	Adamtsl4 Tsrc1	2	2	2.41313	113.2	2
K4DI77	WD repeat-containing protein 81 (Fragment)	Wdr81	1	1	0.361944	211.8	1
Q99P30	Peroxisomal coenzyme A diphosphatase NUDT7 (EC 3.6.1.-) (Nucleoside diphosphate-linked moiety X motif 7) (Nudix motif 7)	Nudt7	3	3	9.32203	26.8	3
Q6PAJ1	Breakpoint cluster region protein (EC 2.7.11.1)	Bcr Kiaa3017	2	2	1.88976	143	2
Q60866	Phosphotriesterase-related protein (EC 3.1.-.-) (Parathion hydrolase-related protein)	Pter	1	1	3.15186	39.2	1
Q80ZI6	E3 ubiquitin-protein ligase LRSAM1 (EC 2.3.2.27) (Leucine-rich repeat and sterile alpha motif-containing protein 1) (RING-type E3 ubiquitin transferase LRSAM1) (Tsg101-associated ligase)	Lrsam1	1	1	1.10041	83.9	1
A2AP82	Transcription initiation factor TFIID subunit 9B	Taf9b	1	1	2.73038	32	1
A0A0A0MQ68	Glutaryl-CoA dehydrogenase, mitochondrial	Gcdh	2	2	4.9217	49.5	3
Q9JKC7	AP-4 complex subunit mu-1 (AP-4 adaptor complex mu subunit) (Adaptor-related protein complex 4 subunit mu-1) (Mu subunit of AP-4) (Mu-adaptin-related protein 2) (mu-ARP2) (Mu4-adaptin) (mu4)	Ap4m1	1	1	3.11804	49.5	1
D3Z0M9	DEAD (Asp-Glu-Ala-Asp) box polypeptide 23 (MCG18410, isoform CRA_a)	Ddx23 mCG_18410	2	2	2.442	95.4	2
O35901	U6 snRNA-associated Sm-like protein LSm2	Lsm2 G7b Sm-X5 SmX5 mCG_15927	1	1	14.5038	14.8	2
P59235	Nucleoporin Nup43 (Nup107-160 subcomplex subunit Nup43)	Nup43	1	1	4.21053	42	1
Q5SX75	Procollagen-proline, 2-oxoglutarate 4-dioxygenase (Proline 4-hydroxylase), alpha II polypeptide, isoform CRA_f (Prolyl 4-hydroxylase subunit alpha-2)	P4ha2 mCG_13782	2	2	5.21415	61	2
Q6P5D3	Putative ATP-dependent RNA helicase DHX57 (EC 3.6.4.13) (DEAH box protein 57)	Dhx57	2	1	1.72911	155.7	2
E9QKY4	FYVE, RhoGEF and PH domain-containing protein 5	Fgd5	1	1	0.858653	166.8	1
Q3TFQ1	SPRY domain-containing protein 7 (Chronic lymphocytic leukemia deletion region gene 6 protein homolog) (CLL deletion region gene 6 protein homolog)	Spryd7 Clld6	2	2	8.16327	21.7	2
Q3TXV4	Rab22B (Ras-related protein Rab-31)	Rab31 Rab22B	1	1	7.17949	21.4	2
Q3UNZ8	Quinone oxidoreductase-like protein 2 (EC 1.-.-.-) (Zeta-crystallin homolog 2)	Cryzl2	1	1	3.14286	37.8	1
Q9EQ28	DNA polymerase delta subunit 3 (DNA polymerase delta subunit p66)	Pold3	1	1	1.94805	50.8	1
Q91ZM2	SH2B adapter protein 1 (Pro-rich, PH and SH2 domain-containing signaling mediator) (PSM) (SH2 domain-containing protein 1B) (SH2-B PH domain-containing signaling mediator 1)	Sh2b1 Sh2bpsm1	3	3	4.89418	79.6	3
Q7TQD2	Tubulin polymerization-promoting protein (TPPP)	Tppp	1	1	3.66972	23.6	1
E9Q9M1	Cytosolic purine 5'-nucleotidase	Nt5c2	2	2	3.24232	67.7	2
P98086	Complement C1q subcomponent subunit A	C1qa	3	3	14.6939	26	4
E9QK41	Actin-binding LIM protein 1	Ablim1	5	5	6.27178	96.8	7
P61759	Prefoldin subunit 3 (von Hippel-Lindau-binding protein 1) (VBP-1) (VHL-binding protein 1)	Vbp1 Pfdn3	5	5	26.0204	22.4	8
Q3TCH7	Cullin-4A (CUL-4A)	Cul4a	2	1	2.50329	87.7	3
G5E8J3	Bromodomain and WD repeat domain containing 2, isoform CRA_a (WD repeat-containing protein 11)	Wdr11 Brwd2 mCG_22163	2	2	1.79886	135.9	2
C0HK79	Adipocyte-related X-chromosome expressed sequence 1	Arxes1	1	1	8.33333	20.1	1
Q8R238	Serine dehydratase-like (EC 4.3.1.17) (L-serine deaminase) (L-serine dehydratase/L-threonine deaminase) (L-threonine dehydratase) (TDH) (EC 4.3.1.19) (SDH)	Sdsl Sds	2	2	4.55927	34.7	3
P63147	Ubiquitin-conjugating enzyme E2 B (EC 2.3.2.23) (E2 ubiquitin-conjugating enzyme B) (E214K) (RAD6 homolog B) (HR6B) (mHR6B) (Ubiquitin carrier protein B) (Ubiquitin-protein ligase B)	Ube2b Rad6b	1	1	7.89474	17.3	1
A0A075B5P8	Immunoglobulin heavy variable 2-2 (Fragment)	Ighv2-2	1	1	13.7931	12.6	1
Q8R5I6	Glutathione S-transferase mu 4 (Glutathione S-transferase, mu 4) (Glutathione transferase GSTM7-7) (EC 2.5.1.18)	Gstm4	7	2	35.3211	25.5	34
F7C106	Cytochrome c oxidase subunit 5B, mitochondrial	Cox5b	2	1	46.1538	5.8	7
A0A1S6GWJ4	DEAD (Asp-Glu-Ala-Asp) box polypeptide 41 (Probable ATP-dependent RNA helicase DDX41)	Ddx41 mCG_3197	1	1	1.57978	71.1	1
Q9Z1B3	1-phosphatidylinositol 4,5-bisphosphate phosphodiesterase beta-1 (EC 3.1.4.11) (PLC-154) (Phosphoinositide phospholipase C-beta-1) (Phospholipase C-beta-1) (PLC-beta-1)	Plcb1 Plcb	5	5	5.50987	138.3	5
O70165	Ficolin-1 (Collagen/fibrinogen domain-containing protein 1) (Ficolin-A) (Ficolin-alpha) (M-ficolin)	Fcn1 Fcna	1	1	2.69461	36.3	1
A0A0R4J288	DOM-3 homolog Z (C. elegans), isoform CRA_a (Decapping and exoribonuclease protein)	Dxo Dom3z mCG_15915	2	2	3.02267	45.3	2
Q80VP0	Tectonin beta-propeller repeat-containing protein 1	Tecpr1 Kiaa1358	2	2	1.71527	130.2	2
Q91X97	Neurocalcin-delta	Ncald D15Ertd412e	3	1	13.4715	22.2	4
E9Q3T0	Predicted pseudogene 10073	Gm10073	1	1	14.0351	11.4	3
Q8BHS3	Pre-mRNA-splicing factor RBM22 (RNA-binding motif protein 22)	Rbm22	3	3	5.71429	46.9	3
Q60838	Segment polarity protein dishevelled homolog DVL-2 (Dishevelled-2) (DSH homolog 2)	Dvl2	2	2	2.85326	78.8	2
A2AS37	Expressed sequence AI182371	AI182371	1	1	3.65169	40.4	1
P70202	Latexin (Endogenous carboxypeptidase inhibitor) (ECI) (Tissue carboxypeptidase inhibitor) (TCI)	Lxn	2	2	12.1622	25.5	2
Q3TIV5	Zinc finger CCCH domain-containing protein 15 (DRG family-regulatory protein 1) (Epo-immediate response gene protein FM22)	Zc3h15 Dfrp1	2	2	3.75587	48.3	2
Q9R049	E3 ubiquitin-protein ligase AMFR (EC 2.3.2.27) (Autocrine motility factor receptor) (AMF receptor) (RING-type E3 ubiquitin transferase AMFR)	Amfr	1	1	1.55521	73.1	1
O08715	A-kinase anchor protein 1, mitochondrial (Dual specificity A-kinase-anchoring protein 1) (D-AKAP-1) (Protein kinase A-anchoring protein 1) (PRKA1) (Spermatid A-kinase anchor protein) (S-AKAP)	Akap1 Akap	1	1	1.16686	92.1	1
Q9Z0F8	Disintegrin and metalloproteinase domain-containing protein 17 (ADAM 17) (EC 3.4.24.86) (TNF-alpha convertase) (TNF-alpha-converting enzyme) (CD antigen CD156b)	Adam17 Tace	2	2	2.90206	93	3
Q7TQ95	Endoplasmic reticulum junction formation protein lunapark (ER junction formation factor lunapark) (Protein ulnaless)	Lnpk Kiaa1715 Lnp Uln	2	2	5.17647	47.5	2
E9QP49	EH domain-binding protein 1-like protein 1	Ehbp1l1	7	7	4.88941	184.7	8
Q99JX7	Nuclear RNA export factor 1 (Tip-associated protein) (Tip-associating protein) (mRNA export factor TAP)	Nxf1 Tap	1	1	2.91262	70.3	1
H7BX05	Obscurin	Obscn	2	2	1.59363	874	3
P10852	4F2 cell-surface antigen heavy chain (4F2hc) (Solute carrier family 3 member 2) (CD antigen CD98)	Slc3a2 Mdu1	5	5	8.93536	58.3	7
Q9QZD8	Mitochondrial dicarboxylate carrier (Solute carrier family 25 member 10)	Slc25a10 Dic	3	3	10.1045	31.7	3
Q6P9Q4	FH1/FH2 domain-containing protein 1 (Formin homolog overexpressed in spleen 1) (FHOS) (Formin homology 2 domain-containing protein 1)	Fhod1 Fhos1	3	3	2.25564	129.5	3
Q80TR8	DDB1- and CUL4-associated factor 1 (Serine/threonine-protein kinase VPRBP) (EC 2.7.11.1)	Dcaf1 Kiaa0800 Vprbp	1	1	0.464807	168.8	1
Q01705	Neurogenic locus notch homolog protein 1 (Notch 1) (Motch A) (mT14) (p300) [Cleaved into: Notch 1 extracellular truncation (NEXT); Notch 1 intracellular domain (NICD)]	Notch1 Motch	1	1	0.316081	270.7	1
Q9D081	UDP-N-acetylglucosamine transferase subunit ALG14 homolog	Alg14	1	1	4.14747	24.4	1
G3X9L9	Myomegalin (Phosphodiesterase 4D interacting protein (Myomegalin), isoform CRA_a)	Pde4dip mCG_11103	2	1	0.609013	277.3	6
Q9R1K9	Centrin-2 (Caltractin isoform 1)	Cetn2 Calt	3	3	14.5349	19.8	4
Q9QX60	Deoxyguanosine kinase, mitochondrial (dGK) (EC 2.7.1.113)	Dguok Dgk	3	3	12.9964	32.3	4
G5E8J0	Neurogenic locus notch homolog protein 2 (Notch 2) (Motch B) [Cleaved into: Notch 2 extracellular truncation; Notch 2 intracellular domain]	Notch2	3	2	1.2131	265.5	3
Q9D6N1	Carbonic anhydrase 13 (EC 4.2.1.1) (Carbonate dehydratase XIII) (Carbonic anhydrase XIII) (CA-XIII)	Ca13 Car13	1	1	3.43511	29.5	1
Q8C7K6	Prenylcysteine oxidase-like (EC 1.8.3.-)	Pcyox1l	2	2	4.84848	54.8	3
G3X937	Solute carrier family 41 member 3 (Solute carrier family 41, member 3)	Slc41a3 mCG_128603	1	1	2.66393	53.3	1
Q8VE88	Protein FAM114A2	Fam114a2	4	4	8.4507	54	5
Q9JJL8	Serine--tRNA ligase, mitochondrial (EC 6.1.1.11) (SerRSmt) (Seryl-tRNA synthetase) (SerRS) (Seryl-tRNA(Ser/Sec) synthetase)	Sars2 Sarsm	5	5	12.9344	58.3	7
Q8BH75	E3 ubiquitin-protein ligase NRDP1 (EC 2.3.2.27) (RING finger protein 41) (RING-type E3 ubiquitin transferase NRDP1)	Rnf41 Flrf Nrdp1	1	1	2.83912	35.9	1
Q8R3F5	Malonyl-CoA-acyl carrier protein transacylase, mitochondrial (MCT) (EC 2.3.1.39) (Mitochondrial malonyltransferase) ([Acyl-carrier-protein] malonyltransferase)	Mcat Mt	3	3	8.92388	41.9	4
Q9D2Y4	Mixed lineage kinase domain-like protein	Mlkl	2	2	3.81356	54.3	2
A0A0A0MQ82	Mitogen-activated protein kinase kinase kinase 6	Map3k6	2	2	1.08443	142.9	2
Q6P9S7	Polypeptide N-acetylgalactosaminyltransferase 10 (EC 2.4.1.41) (Polypeptide GalNAc transferase 10) (GalNAc-T10) (pp-GaNTase 10) (Protein-UDP acetylgalactosaminyltransferase 10) (UDP-GalNAc:polypeptide N-acetylgalactosaminyltransferase 10)	Galnt10	1	1	1.3267	69.1	1
I1E4X1	Syntaxin 5A	Stx5a	2	2	6.33484	49.1	2
P59383	Leucine-rich repeat neuronal protein 4 (Neuronal leucine-rich repeat protein 4) (NLRR-4)	Lrrn4	2	2	2.86494	80.4	2
Q3TP92	CTD nuclear envelope phosphatase 1 (EC 3.1.3.16) (Serine/threonine-protein phosphatase dullard)	Ctdnep1 Dullard	1	1	4.5082	28.4	2
Q9JKB3	Y-box-binding protein 3 (Cold shock domain-containing protein A) (DNA-binding protein A) (Y-box protein 3)	Ybx3 Csda Msy4	2	1	9.9723	38.8	2
Q9DCU6	39S ribosomal protein L4, mitochondrial (L4mt) (MRP-L4)	Mrpl4 MNCb-3848	4	4	13.2653	33.1	5
Q9DBC3	Cap-specific mRNA (nucleoside-2'-O-)-methyltransferase 1 (EC 2.1.1.57) (Cap methyltransferase 1) (Cap1 2'O-ribose methyltransferase 1) (MTr1) (FtsJ methyltransferase domain-containing protein 2)	Cmtr1 Ftsjd2 Kiaa0082	2	2	2.27001	95.6	3
E9Q4S7	Receptor-type tyrosine-protein phosphatase eta	Ptprj	2	2	1.11111	148.5	2
E9PV48	Interferon-induced protein with tetratricopeptide repeats 3B	Ifit3b I830012O16Rik	1	1	2.72953	47.2	1
A0A140T8N2	Protein Igkv5-48 (Fragment)	Igkv5-48	1	1	10.4348	12.6	1
Q9CRA0	Ecto-ADP-ribosyltransferase 4 (EC 2.4.2.31) (ADP-ribosyltransferase C2 and C3 toxin-like 4) (ARTC4) (Mono(ADP-ribosyl)transferase 4) (NAD(P)(+)--arginine ADP-ribosyltransferase 4) (CD antigen CD297)	Art4	2	2	5.66667	33.1	2
P70677	Caspase-3 (CASP-3) (EC 3.4.22.56) (Apopain) (Cysteine protease CPP32) (CPP-32) (LICE) (Protein Yama) (SREBP cleavage activity 1) (SCA-1) [Cleaved into: Caspase-3 subunit p17; Caspase-3 subunit p12]	Casp3 Cpp32	2	2	8.30325	31.5	3
Q8JZU0	Nucleoside diphosphate-linked moiety X motif 13 (Nudix motif 13) (EC 3.-.-.-)	Nudt13	2	2	4.54545	39.1	3
Q3SXD3	HD domain-containing protein 2	Hddc2	1	1	6.53266	22.7	1
D3Z4S3	Putative peptidyl-tRNA hydrolase PTRHD1 (EC 3.1.1.29) (Peptidyl-tRNA hydrolase domain-containing protein 1)	Ptrhd1	1	1	7.14286	16	1
Q9DCJ1	Target of rapamycin complex subunit LST8 (TORC subunit LST8) (G protein beta subunit-like) (Protein GbetaL) (Mammalian lethal with SEC13 protein 8) (mLST8)	Mlst8 Gbl Lst8	2	2	4.90798	35.8	2
P43023	Cytochrome c oxidase subunit 6A2, mitochondrial (Cytochrome c oxidase polypeptide VIa-heart) (COXVIAH)	Cox6a2	1	1	12.3711	10.7	1
Q9Z2K1	Keratin, type I cytoskeletal 16 (Cytokeratin-16) (CK-16) (Keratin-16) (K16)	Krt16 Krt1-16	5	1	9.16844	51.6	7
D3Z5S8	MCG11933 (Terminal nucleotidyltransferase 5A)	Tent5a Fam46a mCG_11933	1	1	2.90828	50.8	1
P52624	Uridine phosphorylase 1 (UPase 1) (UrdPase 1) (EC 2.4.2.3)	Upp1 Up Upp	1	1	2.57235	34.1	1
Q91WM1	Spermatid perinuclear RNA-binding protein	Strbp Spnr	3	2	4.16667	73.7	3
Q9QUR8	Semaphorin-7A (Semaphorin-K1) (Sema K1) (Semaphorin-L) (Sema L) (CD antigen CD108)	Sema7a Cd108 Semal Semk1	1	1	2.25904	74.9	1
A0A1B0GSU0	Aldehyde dehydrogenase family 16 member A1	Aldh16a1	2	2	3.99002	84.7	2
Q5SSK3	Transcription elongation factor, mitochondrial	Tefm	1	1	2.1978	41.8	1
Q3TRM4	Neuropathy target esterase (EC 3.1.1.5) (Patatin-like phospholipase domain-containing protein 6)	Pnpla6 Nte	2	2	1.47601	149.4	2
P01807	Ig heavy chain V region X44		1	1	9.2437	13.2	1
Q8BMN7	Guanylate-binding protein 5	Gbp5	2	1	1.79558	80.4	2
A0A1D5RLV1	Protein 4.1 (Fragment)	Epb41	4	1	8.82353	54	4
Q8VC30	Triokinase/FMN cyclase (Bifunctional ATP-dependent dihydroxyacetone kinase/FAD-AMP lyase (cyclizing)) [Includes: ATP-dependent dihydroxyacetone kinase (DHA kinase) (EC 2.7.1.28) (EC 2.7.1.29) (Glycerone kinase) (Triokinase) (Triose kinase); FAD-AMP lyase (cyclizing) (EC 4.6.1.15) (FAD-AMP lyase (cyclic FMN forming)) (FMN cyclase)]	Tkfc Dak	1	1	1.90311	59.7	1
P61211	ADP-ribosylation factor-like protein 1	Arl1	1	1	7.18232	20.4	2
P46938	Transcriptional coactivator YAP1 (Yes-associated protein 1) (Protein yorkie homolog) (Yes-associated protein YAP65 homolog)	Yap1 Yap Yap65	1	1	3.27869	52.4	1
Q6ZQ73	Cullin-associated NEDD8-dissociated protein 2 (Cullin-associated and neddylation-dissociated protein 2) (TBP-interacting protein of 120 kDa B) (TBP-interacting protein 120B) (p120 CAND2)	Cand2 Kiaa0667 Tip120b	3	2	2.02429	135.5	4
Q62371	Discoidin domain-containing receptor 2 (Discoidin domain receptor 2) (EC 2.7.10.1) (CD167 antigen-like family member B) (Neurotrophic tyrosine kinase, receptor-related 3) (Receptor protein-tyrosine kinase TKT) (Tyrosine-protein kinase TYRO10) (CD antigen CD167b)	Ddr2 Ntrkr3 Tkt Tyro10	1	1	2.9274	96.4	1
Q8CJH3	Plexin-B1	Plxnb1 Kiaa0407	2	2	0.991034	231.2	2
Q9WTK5	Nuclear factor NF-kappa-B p100 subunit (DNA-binding factor KBF2) (Nuclear factor of kappa light polypeptide gene enhancer in B-cells 2) [Cleaved into: Nuclear factor NF-kappa-B p52 subunit]	Nfkb2	2	2	2.33593	96.8	2
P51670	C-C motif chemokine 9 (CCF18) (Macrophage inflammatory protein 1-gamma) (MIP-1-gamma) (Macrophage inflammatory protein-related protein 2) (MRP-2) (Small-inducible cytokine A9) [Cleaved into: CCL9(29-101); CCL9(30-101); CCL9(31-101)]	Ccl9 Mrp2 Scya10 Scya9	1	1	6.55738	13.9	1
Q8BV57	Soluble scavenger receptor cysteine-rich domain-containing protein SSC5D (Scavenger receptor cysteine-rich domain-containing protein LOC284297 homolog)	Ssc5d S5D-SRCRB	6	6	5.68928	144.5	6
P39053	Dynamin-1 (EC 3.6.5.5)	Dnm1 Dnm Kiaa4093	10	2	9.68858	97.7	15
O54794	Aquaporin-7 (AQP-7) (Aquaglyceroporin-7)	Aqp7	1	1	3.9604	32.6	1
Q6NS82	Reticulophagy regulator 2	Retreg2 Fam134a	1	1	2.03327	57.5	1
Q3TET3	Annexin	Anxa3	8	1	44.4444	20	14
Q6ZQ29	Serine/threonine-protein kinase TAO2 (EC 2.7.11.1) (Thousand and one amino acid protein 2)	Taok2 Kiaa0881	2	1	1.69355	139.2	2
Q9JLM8	Serine/threonine-protein kinase DCLK1 (EC 2.7.11.1) (Doublecortin-like and CAM kinase-like 1) (Doublecortin-like kinase 1)	Dclk1 Dcamkl1 Dclk	2	2	3.1746	84.1	2
Q9CR86	Calcium-regulated heat stable protein 1 (Calcium-regulated heat-stable protein of 24 kDa) (CRHSP-24)	Carhsp1	3	3	17.5676	16.1	3
Q8C1E7	Transmembrane protein 120A (Transmembrane protein induced by tumor necrosis factor alpha)	Tmem120a Net29 Tmpit	1	1	4.95627	40.7	1
P52479	Ubiquitin carboxyl-terminal hydrolase 10 (EC 3.4.19.12) (Deubiquitinating enzyme 10) (Ubiquitin thioesterase 10) (Ubiquitin-specific-processing protease 10)	Usp10 Kiaa0190 Ode-1 Uchrp	2	2	3.40909	87	2
Q9ESJ4	NCK-interacting protein with SH3 domain (54 kDa VacA-interacting protein) (VIP54) (90 kDa N-WASP-interacting protein) (90 kDa SH3 protein interacting with Nck) (SH3 adapter protein SPIN90) (WASP-interacting SH3-domain protein) (WISH) (Wiskott-Aldrich syndrome protein-binding protein) (N-WASP-binding protein)	Nckipsd Spin90 Wasbp	1	1	1.54062	78.5	1
A0A087WSU3	NADH-ubiquinone oxidoreductase 75 kDa subunit, mitochondrial (Fragment)	Ndufs1	4	1	70.4918	6.4	9
E9PV45	Ubiquitin carboxyl-terminal hydrolase 24	Usp24	5	5	1.75707	293.9	5
Q45VK7	Cytoplasmic dynein 2 heavy chain 1 (Cytoplasmic dynein 2 heavy chain) (Dynein cytoplasmic heavy chain 2) (Dynein heavy chain 11) (mDHC11) (Dynein heavy chain isotype 1B)	Dync2h1 Dhc1b Dnchc2 Kiaa1997	1	1	0.232234	492	1
P11214	Tissue-type plasminogen activator (t-PA) (t-plasminogen activator) (tPA) (EC 3.4.21.68) [Cleaved into: Tissue-type plasminogen activator chain A; Tissue-type plasminogen activator chain B]	Plat	3	3	5.00894	63.1	3
D3YZZ3	Mitochondrial amidoxime-reducing component 1	Marc1 Mosc1	2	1	4.97076	38	2
Q31125	Zinc transporter SLC39A7 (Histidine-rich membrane protein Ke4) (Solute carrier family 39 member 7) (Zrt-, Irt-like protein 7) (ZIP7)	Slc39a7 H2-Ke4 Hke4	1	1	1.68067	50.6	1
Q8K3A9	7SK snRNA methylphosphate capping enzyme (MePCE) (EC 2.1.1.-)	Mepce Bcdin3 Bipl1 D5Wsu46e	2	2	2.7027	72	2
P18406	CCN family member 1 (3CH61) (Cellular communication network factor 1) (Cysteine-rich angiogenic inducer 61) (Insulin-like growth factor-binding protein 10) (IBP-10) (IGF-binding protein 10) (IGFBP-10) (Protein CYR61)	Ccn1 Cyr61 Igfbp10	2	2	5.80475	41.7	2
Q9Z315	U4/U6.U5 tri-snRNP-associated protein 1 (Hypoxia-associated factor) (Squamous cell carcinoma antigen recognized by T-cells 1) (SART-1) (mSART-1)	Sart1 Haf	4	4	4.83871	90.8	4
Q99J09	Methylosome protein 50 (MEP-50) (WD repeat-containing protein 77)	Wdr77 Mep50	2	2	8.18713	36.9	2
Q9D159	Melanocortin-2 receptor accessory protein (Fat cell-specific low molecular weight protein) (Fat tissue-specific low MW protein)	Mrap Falp	1	1	9.44882	14.2	1
Q8BZR9	Nuclear cap-binding protein subunit 3	Ncbp3	1	1	1.30081	70	1
P31809	Carcinoembryonic antigen-related cell adhesion molecule 1 (Biliary glycoprotein 1) (BGP-1) (Biliary glycoprotein D) (MHVR1) (Murine hepatitis virus receptor) (MHV-R) (CD antigen CD66a)	Ceacam1 Bgp Bgp1	1	1	3.26296	57	1
Q9ESW4	Acylglycerol kinase, mitochondrial (EC 2.7.1.107) (EC 2.7.1.94) (Multiple substrate lipid kinase) (MuLK) (Multi-substrate lipid kinase)	Agk Mulk	2	2	5.22565	46.9	2
Q8BG48	Serine/threonine-protein kinase 17B (EC 2.7.11.1) (DAP kinase-related apoptosis-inducing protein kinase 2)	Stk17b Drak2	1	1	3.76344	42	1
Q9R0M5	Thiamin pyrophosphokinase 1 (mTPK1) (EC 2.7.6.2) (Thiamine pyrophosphokinase 1)	Tpk1	1	1	7.40741	27.1	1
Q99MU3	Double-stranded RNA-specific adenosine deaminase (DRADA) (EC 3.5.4.37) (RNA adenosine deaminase 1)	Adar	1	1	0.679117	130.4	1
A0A075B5W7	Immunoglobulin heavy variable 1-56	Ighv1-56	1	1	19.3878	10.8	1
Q9CY97	RNA polymerase II subunit A C-terminal domain phosphatase SSU72 (CTD phosphatase SSU72) (EC 3.1.3.16)	Ssu72	2	2	11.8557	22.5	2
Q70FJ1	A-kinase anchor protein 9 (AKAP-9) (Protein kinase A-anchoring protein 9) (PRKA9)	Akap9 Kiaa0803	4	4	0.92178	435.9	4
B2KF50	UHRF1 (ICBP90)-binding protein 1	Uhrf1bp1	2	2	1.53954	156.9	2
Q8BU33	Acetolactate synthase-like protein (EC 2.2.1.-) (IlvB-like protein)	Ilvbl	1	1	1.42405	68.1	1
Q62011	Podoplanin (Glycoprotein 38) (Gp38) (OTS-8) (PA2.26 antigen) (Transmembrane glycoprotein E11) (E11)	Pdpn Gp38 Ots8	1	1	7.55814	18.2	1
P55288	Cadherin-11 (OSF-4) (Osteoblast cadherin) (OB-cadherin)	Cdh11 Cad-11	2	2	1.88442	88.1	2
A0A286YDB3	TBC1 domain family member 5	Tbc1d5	2	2	2.50896	94	2
Q91VK4	Integral membrane protein 2C (Transmembrane protein BRI3) [Cleaved into: CT-BRI3]	Itm2c	1	1	8.17844	30.5	1
J3KMT7	Transducin-like enhancer protein 3	Tle3	2	2	2.29885	84.5	3
Q9CQE5	Regulator of G-protein signaling 10 (RGS10)	Rgs10	1	1	6.62983	21.1	2
Q9D1H6	NADH dehydrogenase [ubiquinone] 1 alpha subcomplex assembly factor 4 (Hormone-regulated proliferation-associated protein of 20 kDa homolog)	Ndufaf4 Hrpap20	2	2	9.24855	20.1	4
Q7TQK5	Coiled-coil domain-containing protein 93	Ccdc93	1	1	1.11288	72.6	1
F6WHQ7	Glutathione S-transferase Mu 1 (Fragment)	Gstm1	8	1	39.6907	22.6	40
Q6PF93	Phosphatidylinositol 3-kinase catalytic subunit type 3 (PI3-kinase type 3) (PI3K type 3) (PtdIns-3-kinase type 3) (EC 2.7.1.137) (Phosphoinositide-3-kinase class 3)	Pik3c3 Vps34	3	2	3.38219	101.4	4
Q99NB8	Ubiquilin-4 (Ataxin-1 interacting ubiquitin-like protein) (A1Up) (Ataxin-1 ubiquitin-like-interacting protein A1U) (Connexin43-interacting protein of 75 kDa) (CIP75)	Ubqln4 Cip75 Ubin	3	2	6.71141	63.5	4
Q9D6K8	FUN14 domain-containing protein 2 (Hepatitis C virus core-binding protein 6)	Fundc2 Hcbp6	1	1	7.28477	16.6	1
Q0GNC1	Inverted formin-2	Inf2	3	2	2.74941	138.5	3
E9Q3C1	C2 domain-containing protein 2	C2cd2 Kiaa4045	1	1	1.00575	76.5	1
D3Z183	Major facilitator superfamily domain-containing protein 6	Mfsd6	1	1	1.25945	87.8	1
A2BDX3	Adenylyltransferase and sulfurtransferase MOCS3 (Molybdenum cofactor synthesis protein 3) [Includes: Molybdopterin-synthase adenylyltransferase (EC 2.7.7.80) (Adenylyltransferase MOCS3) (Sulfur carrier protein MOCS2A adenylyltransferase); Molybdopterin-synthase sulfurtransferase (EC 2.8.1.11) (Sulfur carrier protein MOCS2A sulfurtransferase) (Sulfurtransferase MOCS3)]	Mocs3 Uba4	2	2	6.08696	49.3	2
Q9JKN1	Zinc transporter 7 (ZnT-7) (Solute carrier family 30 member 7) (Znt-like transporter 2)	Slc30a7 Znt7 Zntl2	1	1	3.96825	41.8	1
Q6P9R4	Rho guanine nucleotide exchange factor 18	Arhgef18 Kiaa0521	1	1	1.07738	114.3	1
Q9D1N9	39S ribosomal protein L21, mitochondrial (L21mt) (MRP-L21)	Mrpl21 D9Wsu149	2	2	10.0478	23.4	3
P39429	TNF receptor-associated factor 2 (EC 2.3.2.27) (E3 ubiquitin-protein ligase TRAF2) (RING-type E3 ubiquitin transferase TRAF2)	Traf2	2	1	2.79441	56	2
G3X9H5	Huntingtin (Huntington disease gene homolog, isoform CRA_a)	Htt Hdh mCG_2547	2	2	0.737179	344.6	2
A0A0R4J0L5	Conserved oligomeric Golgi complex subunit 6 (COG complex subunit 6) (Component of oligomeric Golgi complex 6)	Cog6	1	1	1.21766	73	1
F7BJK1	Protocadherin 1 (Fragment)	Pcdh1	1	1	1.85701	116.4	1
Q6DID7	Protein wntless homolog (Integral membrane protein GPR177) (Protein evenness interrupted homolog) (EVI)	Wls Gpr177	2	2	1.84843	62.1	3
Q9D211	CDKN2AIP N-terminal-like protein (CDKN2A-interacting protein N-terminal-like protein)	Cdkn2aipnl D11Ertd497e MNCb-1520	1	1	8.62069	13.2	1
Q9QZB7	Actin-related protein 10 (Actin-related protein 11)	Actr10 Act11 Actr11 Arp11	3	3	7.19424	46.2	3
A2AL50	Alkylglycerone-phosphate synthase (Alkyl-DHAP synthase) (EC 2.5.1.26)	Agps	1	1	1.49031	74.3	1
Q6NT99	Dual specificity protein phosphatase 23 (EC 3.1.3.16) (EC 3.1.3.48) (Low molecular mass dual specificity phosphatase 3) (LDP-3)	Dusp23 Ldp3	3	3	22.6667	16.6	3
E9Q447	Spectrin alpha chain, non-erythrocytic 1	Sptan1 Spna2	130	1	50.7667	285.2	260
O88531	Palmitoyl-protein thioesterase 1 (PPT-1) (EC 3.1.2.22) (Palmitoyl-protein hydrolase 1)	Ppt1 Cln1 Ppt	2	2	8.82353	34.5	3
Q80UM7	Mannosyl-oligosaccharide glucosidase (EC 3.2.1.106) (Glucosidase 1) (Glycoprotein-processing glucosidase I)	Mogs Gcs1	4	4	6.47482	91.8	5
D3Z7P0	BRISC and BRCA1-A complex member 2	Babam2 Bre	1	1	2.5974	43.7	1
G5E8I8	Calcium homeostasis endoplasmic reticulum protein	Cherp	2	2	2.73973	107.6	2
A0A0G2JDR3	Immunoglobulin kappa chain variable 9-124 (Fragment)	Igkv9-124	1	1	11.9658	13	1
Q60766	Immunity-related GTPase family M protein 1 (EC 3.6.5.-) (Interferon-inducible GTPase 3) (Interferon-inducible protein 1) (LPS-stimulated RAW 264.7 macrophage protein 47) (LRG-47)	Irgm1 Ifi1 Iigp3 Irgm	4	4	11.4914	46.5	4
Q5SQ20	Pescadillo homolog	Pes1 PES1	1	1	1.53061	68.2	1
Q4FZC9	Nesprin-3 (KASH domain-containing protein 3) (KASH3) (Nuclear envelope spectrin repeat protein 3)	Syne3	4	4	3.89744	112	5
O35367	Keratocan (KTN) (Keratan sulfate proteoglycan keratocan)	Kera Ktcn	1	1	2.5641	40.4	1
G3X8Y7	MCG22222, isoform CRA_c (Solute carrier family 27 member 3)	Slc27a3 mCG_22222	1	1	1.64918	73	1
Q8R2H9	Phosphoethanolamine/phosphocholine phosphatase (EC 3.1.3.75)	Phospho1	6	6	22.4719	29.9	10
Q9D646	Keratin, type I cuticular Ha4 (Hair keratin, type I Ha4) (Keratin-34) (K34)	Krt34 Ha4 Krt1-4	13	1	34.949	44.5	18
P12246	Serum amyloid P-component (SAP)	Apcs Ptx2 Sap	5	5	23.6607	26.2	6
P97861	Keratin, type II cuticular Hb6 (Keratin-86) (K86) (Type II hair keratin Hb6) (Type-II keratin Kb26)	Krt86 Krt2-10 Krthb6	13	3	22.6337	53.2	27
Q99JB2	Stomatin-like protein 2, mitochondrial (SLP-2) (mslp2)	Stoml2 Slp2	10	10	34.8442	38.4	15
Q9D1C8	Vacuolar protein sorting-associated protein 28 homolog (Caspase-activated DNase inhibitor that interacts with ASK1) (CIIA) (ESCRT-I complex subunit VPS28)	Vps28	5	5	33.0317	25.4	8
H9KV00	Protein SON	Son	6	6	3.3912	268.7	6
Q8CD76	Kinesin light chain 1	Klc1 Kns2	13	10	22.8896	69.5	15
Q9Z2L7	Cytokine receptor-like factor 3 (Cytokine receptor-like molecule 9) (CREME-9) (Cytokine receptor-related factor 4)	Crlf3 Creme9 Cytor4	8	8	15.6109	49.5	8
D3Z230	Type I inositol 3,4-bisphosphate 4-phosphatase	Inpp4a	8	8	9.826	109.6	10
Q3UZG4	Aminoacyl tRNA synthase complex-interacting multifunctional protein 1	Aimp1 Scye1	4	4	14.1066	35.1	6
A0A0R4J050	Aminoacylase-1	Acy1	7	7	20.3431	45.8	10
Q9EPU0	Regulator of nonsense transcripts 1 (EC 3.6.4.-) (ATP-dependent helicase RENT1) (Nonsense mRNA reducing factor 1) (NORF1) (Up-frameshift suppressor 1 homolog) (mUpf1)	Upf1 Rent1	11	11	9.87544	123.9	15
E9Q414	Apolipoprotein B-100 (Apo B-100) [Cleaved into: Apolipoprotein B-48 (Apo B-48)]	Apob	35	35	7.56937	509.1	49
Q4LDD4	Arf-GAP with Rho-GAP domain, ANK repeat and PH domain-containing protein 1 (Centaurin-delta-2) (Cnt-d2)	Arap1 Centd2 Kiaa0782	7	7	5.50964	162.2	10
P11835	Integrin beta-2 (Cell surface adhesion glycoproteins LFA-1/CR3/p150,95 subunit beta) (Complement receptor C3 subunit beta) (CD antigen CD18)	Itgb2	6	6	6.87419	85	7
P24529	Tyrosine 3-monooxygenase (EC 1.14.16.2) (Tyrosine 3-hydroxylase) (TH)	Th	8	8	19.2771	56	9
P50171	Estradiol 17-beta-dehydrogenase 8 (EC 1.1.1.62) (17-beta-hydroxysteroid dehydrogenase 8) (17-beta-HSD 8) (3-ketoacyl-[acyl-carrier-protein] reductase alpha subunit) (KAR alpha subunit) (3-oxoacyl-[acyl-carrier-protein] reductase) (EC 1.1.1.-) (Protein Ke6) (Ke-6) (Testosterone 17-beta-dehydrogenase 8) (EC 1.1.1.239)	Hsd17b8 H2-Ke6 Hke6	5	5	30.1158	26.6	10
P16406	Glutamyl aminopeptidase (EAP) (EC 3.4.11.7) (Aminopeptidase A) (AP-A) (BP-1/6C3 antigen) (CD antigen CD249)	Enpep	12	12	15.5556	107.9	14
Q07797	Galectin-3-binding protein (Cyp-C-associated protein) (CyCAP) (Lectin galactoside-binding soluble 3-binding protein) (Protein MAMA)	Lgals3bp Cycap Mama	6	6	15.4246	64.5	8
Q921H9	Cytochrome c oxidase assembly factor 7 (Beta-lactamase hcp-like protein) (Respiratory chain assembly factor 1) (Sel1 repeat-containing protein 1)	Coa7 Selrc1	2	2	8.22511	25.6	4
Q9D938	Transmembrane protein 160	Tmem160	3	3	15.9574	19.6	5
Q1XH17	Tripartite motif-containing protein 72 (Mitsugumin-53) (Mg53)	Trim72 Mg53	6	6	12.369	52.8	10
Q8R104	NAD-dependent protein deacetylase sirtuin-3 (EC 3.5.1.-) (Regulatory protein SIR2 homolog 3) (SIR2-like protein 3) (mSIR2L3)	Sirt3 Sir2l3	4	4	14.3713	36.6	7
Q91YN9	BAG family molecular chaperone regulator 2 (BAG-2) (Bcl-2-associated athanogene 2)	Bag2	6	6	23.3333	23.5	7
P62717	60S ribosomal protein L18a	Rpl18a	5	5	25.5682	20.7	7
A0A0A6YVU8	MCG119397 (Predicted pseudogene 9774)	Gm9774 mCG_119397	4	4	10.0737	42.1	9
O54998	Peptidyl-prolyl cis-trans isomerase FKBP7 (PPIase FKBP7) (EC 5.2.1.8) (23 kDa FK506-binding protein) (23 kDa FKBP) (FKBP-23) (FK506-binding protein 7) (FKBP-7) (Rotamase)	Fkbp7 Fkbp23	4	4	15.1376	24.9	6
E9Q456	Tropomyosin alpha-1 chain	Tpm1	22	2	62.5	28.7	160
Q99LE6	ATP-binding cassette sub-family F member 2	Abcf2	5	5	6.84713	71.7	5
Q14C51	Pentatricopeptide repeat domain-containing protein 3, mitochondrial (28S ribosomal protein S39, mitochondrial) (MRP-S39)	Ptcd3 Mrps39	7	7	12.7007	77.7	8
Q9WVB4	Slit homolog 3 protein (Slit-3) (Slit3)	Slit3	6	6	4.66185	167.6	6
Q63961	Endoglin (Cell surface MJ7/18 antigen) (CD antigen CD105)	Eng Edg	5	5	9.03522	70	6
P35821	Tyrosine-protein phosphatase non-receptor type 1 (EC 3.1.3.48) (Protein-tyrosine phosphatase 1B) (PTP-1B) (Protein-tyrosine phosphatase HA2) (PTP-HA2)	Ptpn1	3	3	7.63889	49.6	5
Q9WUD1	STIP1 homology and U box-containing protein 1 (EC 2.3.2.27) (Carboxy terminus of Hsp70-interacting protein) (E3 ubiquitin-protein ligase CHIP) (RING-type E3 ubiquitin transferase CHIP)	Stub1 Chip	6	6	20.0658	34.9	10
E9Q7L0	Oxoglutarate dehydrogenase-like	Ogdhl	13	2	11.759	116.5	48
P12265	Beta-glucuronidase (EC 3.2.1.31)	Gusb Gus Gus-s	5	5	9.72222	74.1	7
Q8BU25	Inactive serine protease PAMR1 (Peptidase domain-containing protein associated with muscle regeneration 1) (Regeneration-associated muscle protease homolog)	Pamr1 Ramp	3	3	4.02778	80.3	4
Q80WJ7	Protein LYRIC (3D3/LYRIC) (Lysine-rich CEACAM1 co-isolated protein) (Metadherin) (Metastasis adhesion protein)	Mtdh Lyric	6	6	11.5717	63.8	8
Q9CQ89	Protein CutA (Brain acetylcholinesterase putative membrane anchor)	Cuta	2	2	14.6893	18.9	4
P61148	Fibroblast growth factor 1 (FGF-1) (Acidic fibroblast growth factor) (aFGF) (Heparin-binding growth factor 1) (HBGF-1)	Fgf1 Fgf-1 Fgfa	2	2	10.9677	17.4	4
Q9CXT8	Mitochondrial-processing peptidase subunit beta (EC 3.4.24.64) (Beta-MPP) (P-52)	Pmpcb	10	9	20.2454	54.6	17
Q3UI33	Methionine aminopeptidase 2 (MAP 2) (MetAP 2) (EC 3.4.11.18) (Initiation factor 2-associated 67 kDa glycoprotein) (Peptidase M) (p67) (p67eIF2)	Metap2 METAP2	5	5	10.8607	54.1	6
Q9CRD2	ER membrane protein complex subunit 2 (Tetratricopeptide repeat protein 35) (TPR repeat protein 35)	Emc2 Kiaa0103 Ttc35	6	6	20.5387	34.9	8
P28658	Ataxin-10 (Brain protein E46) (Spinocerebellar ataxia type 10 protein homolog)	Atxn10 Sca10	7	7	19.3684	53.7	10
Q8R0G9	Nuclear pore complex protein Nup133 (133 kDa nucleoporin) (Nucleoporin Nup133)	Nup133	7	7	7.70563	128.5	8
E9Q8Y0	Myosin regulatory light chain 2, ventricular/cardiac muscle isoform	Myl2	3	1	15.3409	19.8	4
P10518	Delta-aminolevulinic acid dehydratase (ALADH) (EC 4.2.1.24) (Porphobilinogen synthase)	Alad Lv	5	5	14.8485	36	7
Q3UHD6	Sorting nexin-27	Snx27 Kiaa0488	5	5	8.53432	61	5
A0A140T8T7	Collagen alpha-5(VI) chain	Col6a5	8	6	2.99242	289.3	10
Q9Z0J0	NPC intracellular cholesterol transporter 2 (Epididymal secretory protein E1) (mE1) (Niemann Pick type C2 protein homolog)	Npc2	2	2	14.094	16.4	3
Q3U487	E3 ubiquitin-protein ligase HECTD3 (EC 2.3.2.26) (HECT domain-containing protein 3) (HECT-type E3 ubiquitin transferase HECTD3)	Hectd3	6	6	7.89779	97.3	6
B2KGF0	Ribulose-phosphate 3-epimerase (EC 5.1.3.1)	Rpe mCG_121562	3	2	10.2128	25.6	7
A0A0A6YWL7	Tyrosine-protein kinase receptor (EC 2.7.10.1)	Ntrk3	4	4	6.01852	97	6
Q9Z1Z2	Serine-threonine kinase receptor-associated protein (UNR-interacting protein)	Strap Unrip	6	6	22.2857	38.4	9
P29387	Guanine nucleotide-binding protein subunit beta-4 (Transducin beta chain 4)	Gnb4	9	6	31.4706	37.4	18
Q8BH74	Nuclear pore complex protein Nup107 (107 kDa nucleoporin) (Nucleoporin Nup107)	Nup107	5	5	5.61555	106.7	7
D3Z3N4	Heterogeneous nuclear ribonucleoprotein H3 (MCG11326, isoform CRA_a)	Hnrnph3 mCG_11326	6	5	22.5434	36.8	10
H7BWY6	Retinol-binding protein 4	Rbp4	3	3	11.4286	28.4	5
Q9D1K2	V-type proton ATPase subunit F (V-ATPase subunit F) (V-ATPase 14 kDa subunit) (Vacuolar proton pump subunit F)	Atp6v1f Atp6s14 Vatf	5	5	40.3361	13.4	9
Q921M3	Splicing factor 3B subunit 3 (Pre-mRNA-splicing factor SF3b 130 kDa subunit) (SF3b130) (Spliceosome-associated protein 130) (SAP 130)	Sf3b3 Kiaa0017	8	8	8.46343	135.5	12
Q9WVA2	Mitochondrial import inner membrane translocase subunit Tim8 A (Deafness dystonia protein 1 homolog)	Timm8a1 Ddp1 Tim8a Timm8a	3	3	38.1443	11	8
Q8K3K7	1-acyl-sn-glycerol-3-phosphate acyltransferase beta (EC 2.3.1.51) (1-acylglycerol-3-phosphate O-acyltransferase 2) (1-AGP acyltransferase 2) (1-AGPAT 2) (Lysophosphatidic acid acyltransferase beta) (LPAAT-beta)	Agpat2	6	6	22.3022	31	14
Q8CF89	TGF-beta-activated kinase 1 and MAP3K7-binding protein 1 (Mitogen-activated protein kinase kinase kinase 7-interacting protein 1) (TGF-beta-activated kinase 1-binding protein 1) (TAK1-binding protein 1)	Tab1 Map3k7ip1	6	6	13.745	54.6	6
Q8BIJ7	RUN and FYVE domain-containing protein 1 (Rab4-interacting protein)	Rufy1 Rabip4	6	6	7.86517	80.3	6
P36371	Antigen peptide transporter 2 (APT2) (ATP-binding cassette sub-family B member 3) (Histocompatibility antigen modifier 2)	Tap2 Abcb3 Ham-2 Ham2	6	6	7.97721	77.4	7
Q9D4H8	Cullin-2 (CUL-2)	Cul2	8	8	11.0067	86.8	9
Q8BXK9	Chloride intracellular channel protein 5	Clic5	3	3	14.741	28.3	6
Q64487	Receptor-type tyrosine-protein phosphatase delta (Protein-tyrosine phosphatase delta) (R-PTP-delta) (EC 3.1.3.48)	Ptprd	6	6	4.0272	214.3	6
Q9DCB8	Iron-sulfur cluster assembly 2 homolog, mitochondrial (HESB-like domain-containing protein 1)	Isca2 Hbld1	5	5	33.7662	16.7	7
G3X8X6	Sialic acid binding Ig-like lectin 1, sialoadhesin, isoform CRA_b (Sialoadhesin)	Siglec1 mCG_18494	15	15	9.0535	183.5	18
Q9QWK4	CD5 antigen-like (Apoptosis inhibitor expressed by macrophages) (mAIM) (Apoptosis inhibitory 6) (SP-alpha)	Cd5l Aim Api6	10	9	28.4091	38.8	19
Q8BGB7	Enolase-phosphatase E1 (EC 3.1.3.77) (2,3-diketo-5-methylthio-1-phosphopentane phosphatase) (MASA homolog)	Enoph1 Masa	4	4	13.2296	28.6	4
E9QNU1	NAD(P)(+)--arginine ADP-ribosyltransferase (EC 2.4.2.31) (Mono(ADP-ribosyl)transferase)	Art3	6	6	14.7453	42.2	9
Q9R0S3	Matrix metalloproteinase-17 (MMP-17) (EC 3.4.24.-) (Membrane-type matrix metalloproteinase 4) (MT-MMP 4) (MTMMP4) (Membrane-type-4 matrix metalloproteinase) (MT4-MMP) (MT4MMP)	Mmp17 Mt4mmp	8	8	14.5329	64.3	11
P58059	28S ribosomal protein S21, mitochondrial (MRP-S21) (S21mt)	Mrps21 Rpms21	3	3	40.2299	10.6	5
P46664	Adenylosuccinate synthetase isozyme 2 (AMPSase 2) (AdSS 2) (EC 6.3.4.4) (Adenylosuccinate synthetase, acidic isozyme) (Adenylosuccinate synthetase, liver isozyme) (L-type adenylosuccinate synthetase) (IMP--aspartate ligase 2)	Adss Adss2	10	10	28.0702	50	14
P56213	FAD-linked sulfhydryl oxidase ALR (EC 1.8.3.2) (Augmenter of liver regeneration)	Gfer Alr MNCb-0663	3	3	13.6364	22.9	5
P40336	Vacuolar protein sorting-associated protein 26A (H<beta>58 protein) (H beta 58) (Vesicle protein sorting 26A) (mVPS26)	Vps26a Vps26	9	8	27.2171	38.1	12
Q9CQD1	Ras-related protein Rab-5A	Rab5a nnyRab5a	7	4	41.3953	23.6	15
P46467	Vacuolar protein sorting-associated protein 4B (EC 3.6.4.6) (Suppressor of K(+) transport growth defect 1) (Protein SKD1)	Vps4b Skd1	4	4	8.10811	49.4	6
H3BK24	Homeobox protein cut-like	Cux1	5	5	3.39096	164.4	5
Q9EPL8	Importin-7 (Imp7) (Ran-binding protein 7) (RanBP7)	Ipo7 Ranbp7	7	7	6.93642	119.4	11
Q9R0H5	Keratin, type II cytoskeletal 71 (Cytokeratin-6G) (CK-6G) (Cytokeratin-71) (CK-71) (Keratin-6G) (K6G) (Keratin-71) (K71) (Type II inner root sheath-specific keratin-K6irs1) (mK6irs) (mK6irs1/Krt2-6g) (Type-II keratin Kb34)	Krt71 K6irs1 Kb34 Krt2-6g Krt6g	3	1	5.15267	57.3	7
Q9EPR5	VPS10 domain-containing receptor SorCS2 [Cleaved into: SorCS2 122 kDa chain; SorCS2 104 kDa chain; SorCS2 18 kDa chain]	Sorcs2	7	7	5.522	128.8	7
Q91YP2	Neurolysin, mitochondrial (EC 3.4.24.16) (Microsomal endopeptidase) (MEP) (Mitochondrial oligopeptidase M) (Neurotensin endopeptidase)	Nln	4	3	4.40341	80.4	5
A9XX86	MCG21506 (Macrophage galactose N-acetyl-galactosamine specific lectin 2 isoform i) (Macrophage galactose N-acetyl-galactosamine-specific lectin 2)	Mgl2 mCG_21506	9	4	26.5092	43.5	13
O54901	OX-2 membrane glycoprotein (MRC OX-2 antigen) (CD antigen CD200)	Cd200 Mox2	5	5	21.5827	31.2	8
Q6ZPJ3	(E3-independent) E2 ubiquitin-conjugating enzyme UBE2O (EC 2.3.2.24) (E2/E3 hybrid ubiquitin-protein ligase UBE2O) (Ubiquitin carrier protein O) (Ubiquitin-conjugating enzyme E2 O) (Ubiquitin-conjugating enzyme E2 of 230 kDa) (Ubiquitin-conjugating enzyme E2-230K) (Ubiquitin-protein ligase O)	Ube2o Kiaa1734	5	5	3.80435	140.7	5
Q8VCC9	Spondin-1 (F-spondin)	Spon1	10	10	13.1351	90.8	14
B1ARU1	Microtubule-actin cross-linking factor 1	Macf1	27	4	4.54623	662.9	28
E9Q6D8	Complement component 6	C6	6	6	6.22986	104.4	7
P01592	Immunoglobulin J chain	Jchain Igj	2	2	13.2075	18	4
O88967	ATP-dependent zinc metalloprotease YME1L1 (EC 3.4.24.-) (ATP-dependent metalloprotease FtsH1) (YME1-like protein 1)	Yme1l1	5	5	5.73427	80	5
P97333	Neuropilin-1 (A5 protein) (CD antigen CD304)	Nrp1 Nrp	6	6	6.82557	102.9	8
Q3TJZ6	Protein FAM98A	Fam98a	3	2	6.79612	55	4
Q9D0L4	Uncharacterized aarF domain-containing protein kinase 1 (EC 2.7.11.-)	Adck1	8	8	16	59.7	8
Q8C570	mRNA export factor (Rae1 protein homolog) (mRNA-associated protein mrnp 41)	Rae1 Mrnp41	2	2	7.6087	40.9	4
Q9WV80	Sorting nexin-1	Snx1	7	4	12.2605	58.9	8
Q9CQR4	Acyl-coenzyme A thioesterase 13 (Acyl-CoA thioesterase 13) (EC 3.1.2.-) (Thioesterase superfamily member 2)	Acot13 Them2	4	4	25.7143	15.2	6
A2AVR9	Dynein light chain roadblock	Dynlrb1	1	1	11.5385	11.9	4
F8VQ75	Kinesin-like protein KIF13A	Kif13a	6	4	3.60206	195.6	7
Q8CG19	Latent-transforming growth factor beta-binding protein 1 (LTBP-1) (Transforming growth factor beta-1-binding protein 1) (TGF-beta1-BP-1)	Ltbp1	10	10	5.25701	186.6	12
A0A1D5RLG3	Rab3 GTPase-activating protein catalytic subunit	Rab3gap1	7	7	7.59109	110.9	7
Q3TLP5	Enoyl-CoA hydratase domain-containing protein 2, mitochondrial	Echdc2 D4Ertd765e	5	5	23.6486	31.8	6
E9PVA6	ARF GTPase-activating protein GIT2	Git2	5	4	6.06061	84.4	5
Q8K0V4	CCR4-NOT transcription complex subunit 3 (CCR4-associated factor 3)	Cnot3 Not3	2	2	2.66312	81.9	3
P62754	40S ribosomal protein S6 (Phosphoprotein NP33)	Rps6	6	6	24.0964	28.7	12
P11152	Lipoprotein lipase (LPL) (EC 3.1.1.34)	Lpl	5	5	13.7131	53.1	7
Q8R2G6	Coiled-coil domain-containing protein 80 (Up-regulated in BRS-3 deficient mouse)	Ccdc80 Urb	4	4	4.53109	107.5	4
P28843	Dipeptidyl peptidase 4 (EC 3.4.14.5) (Dipeptidyl peptidase IV) (DPP IV) (T-cell activation antigen CD26) (Thymocyte-activating molecule) (THAM) (CD antigen CD26) [Cleaved into: Dipeptidyl peptidase 4 membrane form (Dipeptidyl peptidase IV membrane form); Dipeptidyl peptidase 4 soluble form (Dipeptidyl peptidase IV soluble form)]	Dpp4 Cd26	6	6	9.60526	87.4	8
P13439	Uridine 5'-monophosphate synthase (UMP synthase) [Includes: Orotate phosphoribosyltransferase (OPRTase) (EC 2.4.2.10); Orotidine 5'-phosphate decarboxylase (EC 4.1.1.23) (OMPdecase)]	Umps	3	3	5.19751	52.3	4
Q3U422	NADH dehydrogenase [ubiquinone] flavoprotein 3, mitochondrial (RIKEN cDNA 1500032D16, isoform CRA_a)	Ndufv3 1500032D16Rik mCG_14261	4	3	7.90598	50.5	6
E9Q9C3	Afadin	Afdn	9	9	5.52819	207.2	11
Q3TC33	Coiled-coil domain-containing protein 127	Ccdc127	3	3	10.3846	30.5	3
Q9CWZ3	RNA-binding protein 8A (RNA-binding motif protein 8A) (Ribonucleoprotein RBM8A)	Rbm8a Rbm8	2	2	9.77011	19.9	2
P28063	Proteasome subunit beta type-8 (EC 3.4.25.1) (Low molecular mass protein 7) (Macropain subunit C13) (Multicatalytic endopeptidase complex subunit C13) (Proteasome component C13) (Proteasome subunit beta-5i)	Psmb8 Lmp7 Mc13	5	5	21.0145	30.2	10
Q8CJF9	Protein argonaute-3 (Argonaute3) (mAgo3) (EC 3.1.26.n2) (Argonaute RISC catalytic component 3) (Eukaryotic translation initiation factor 2C 3) (eIF-2C 3) (eIF2C 3) (Piwi/argonaute family protein meIF2C3)	Ago3 Eif2c3	5	4	6.04651	97.2	5
Q9EPL2	Calsyntenin-1 (Alcadein-alpha) (Alc-alpha) [Cleaved into: Soluble Alc-alpha (SAlc-alpha); CTF1-alpha (C-terminal fragment 1-alpha)]	Clstn1 Cs1 Cstn1 Kiaa0911	5	5	5.72012	108.8	7
Q6Q899	Probable ATP-dependent RNA helicase DDX58 (EC 3.6.4.13) (DEAD box protein 58) (RIG-I-like receptor 1) (RLR-1) (Retinoic acid-inducible gene 1 protein) (RIG-1) (Retinoic acid-inducible gene I protein) (RIG-I)	Ddx58	13	13	12.311	105.9	14
A0A1B0GSA5	Phospholipase DDHD2	Ddhd2	11	11	18.7671	82.1	14
Q9CR98	Protein FAM136A	Fam136a	3	3	18.8406	15.7	4
Q9CR59	Growth arrest and DNA damage-inducible proteins-interacting protein 1 (39S ribosomal protein L59, mitochondrial) (MRP-L59)	Gadd45gip1 Mrpl59	3	3	11.2613	25.8	3
Q8VDC1	FYVE and coiled-coil domain-containing protein 1	Fyco1	3	3	2.85317	162.2	4
Q8BFQ8	Glutamine amidotransferase-like class 1 domain-containing protein 1 (Parkinson disease 7 domain-containing protein 1)	Gatd1 Pddc1	3	3	10.9091	23.3	5
F7DCH5	CLIP-associating protein 2	Clasp2	6	6	4.36113	142.8	8
D3YTT6	Oxysterol-binding protein	Osbpl3	4	4	5.30474	100.4	4
Q6DFZ1	Golgi-specific brefeldin A-resistance factor 1	Gbf1	7	6	3.1166	206.7	7
D3YUE2	Procollagen C-endopeptidase enhancer 1	Pcolce	5	5	12.5761	53.1	11
Q8JZM7	Parafibromin (Cell division cycle protein 73 homolog) (Hyperparathyroidism 2 protein homolog)	Cdc73	4	4	6.96798	60.5	4
P58242	Acid sphingomyelinase-like phosphodiesterase 3b (ASM-like phosphodiesterase 3b) (EC 3.1.4.-)	Smpdl3b Asml3b	4	4	7.67544	51.6	6
Q11136	Xaa-Pro dipeptidase (X-Pro dipeptidase) (EC 3.4.13.9) (Imidodipeptidase) (Peptidase 4) (Peptidase D) (Proline dipeptidase) (Prolidase)	Pepd Pep4	11	11	23.3266	55	14
Q8QZY1	Eukaryotic translation initiation factor 3 subunit L (eIF3l) (66 kDa tyrosine-rich heat shock protein) (67 kDa polymerase-associated factor) (Eukaryotic translation initiation factor 3 subunit 6-interacting protein) (Eukaryotic translation initiation factor 3 subunit E-interacting protein) (HSP-66Y) (PAF67)	Eif3l Eif3eip Eif3s6ip Paf67	10	10	18.0851	66.6	14
Q14BI5	Myomesin 2	Myom2	14	14	9.97949	164.6	18
Q80X73	Protein pelota homolog (EC 3.1.-.-)	Pelo	3	3	8.57143	43.3	5
Q8BPG6	Inactive C-alpha-formylglycine-generating enzyme 2 (Sulfatase-modifying factor 2)	Sumf2	3	3	12.6623	34.7	5
E9PUQ5	Golgin subfamily A member 2	Golga2	5	5	5.65302	116.2	6
P62309	Small nuclear ribonucleoprotein G (snRNP-G) (Sm protein G) (Sm-G) (SmG)	Snrpg	3	3	26.3158	8.5	5
Q64437	Alcohol dehydrogenase class 4 mu/sigma chain (EC 1.1.1.1) (ADH-C2) (Alcohol dehydrogenase 7) (Alcohol dehydrogenase class IV mu/sigma chain) (Gastric alcohol dehydrogenase) (Retinol dehydrogenase)	Adh7 Adh-3 Adh3	4	3	10.1604	39.9	8
Q8BKC5	Importin-5 (Imp5) (Importin subunit beta-3) (Karyopherin beta-3) (Ran-binding protein 5) (RanBP5)	Ipo5 Kpnb3 Ranbp5	9	9	9.84503	123.5	9
Q99NH0	Ankyrin repeat domain-containing protein 17 (Ankyrin repeat domain-containing protein FOE) (Gene trap ankyrin repeat protein)	Ankrd17 Foe Gtar Kiaa0697	6	6	2.42028	274	8
Q8CAK1	Putative transferase CAF17 homolog, mitochondrial (EC 2.1.-.-) (Iron-sulfur cluster assembly factor homolog)	Iba57	3	3	9.49721	38.4	3
A2A4J8	Vacuolar protein-sorting-associated protein 25	Vps25	4	4	22.2826	21.6	8
P26883	Peptidyl-prolyl cis-trans isomerase FKBP1A (PPIase FKBP1A) (EC 5.2.1.8) (12 kDa FK506-binding protein) (12 kDa FKBP) (FKBP-12) (Calstabin-1) (FK506-binding protein 1A) (FKBP-1A) (Immunophilin FKBP12) (Rotamase)	Fkbp1a Fkbp1	2	2	25	11.9	10
P18242	Cathepsin D (EC 3.4.23.5)	Ctsd	11	11	33.9024	44.9	19
K3W4R7	Troponin T, cardiac muscle	Tnnt2	9	9	24.5847	35.8	13
E9Q8I9	Protein furry homolog	Fry Kiaa4143	4	4	1.29139	338.9	4
Q8VEH8	Endoplasmic reticulum lectin 1 (ER lectin) (Erlectin)	Erlec1	3	3	6.41822	54.9	3
Q8BFP9	[Pyruvate dehydrogenase (acetyl-transferring)] kinase isozyme 1, mitochondrial (EC 2.7.11.2) (Pyruvate dehydrogenase kinase isoform 1) (PDH kinase 1)	Pdk1	5	3	10.8295	49	7
Q8R0Y8	Mitochondrial coenzyme A transporter SLC25A42 (Solute carrier family 25 member 42)	Slc25a42	3	3	9.43396	35.2	4
Q9D5J6	Sedoheptulokinase (SHK) (EC 2.7.1.14) (Carbohydrate kinase-like protein)	Shpk Carkl	4	4	10.2941	51.3	4
F8WHU5	Sister chromatid cohesion protein PDS5 homolog B	Pds5b	5	2	3.1746	164.7	5
P14094	Sodium/potassium-transporting ATPase subunit beta-1 (Sodium/potassium-dependent ATPase subunit beta-1)	Atp1b1 Atp4b	5	5	14.8026	35.2	7
A2BGI8	Peptidyl-prolyl cis-trans isomerase (PPIase) (EC 5.2.1.8) (Fragment)	Ppih	6	4	31.6456	17.2	9
Q6P542	ATP-binding cassette sub-family F member 1	Abcf1	4	4	5.97372	94.9	4
Q61249	Immunoglobulin-binding protein 1 (Alpha4 phosphoprotein) (CD79a-binding protein 1) (Lymphocyte signal transduction molecule alpha 4) (Protein phosphatase 2/4/6 regulatory subunit) (p52)	Igbp1 Pc52	3	3	6.76471	38.9	4
Q922W6	MCG9886 (Matrix metallopeptidase 3) (Matrix metalloproteinase 3) (Stromelysin-1)	Mmp3 mCG_9886	4	4	8.76827	54.1	6
Q9EPE9	Manganese-transporting ATPase 13A1 (CATP) (EC 3.6.3.-)	Atp13a1 Atp13a	6	6	5.33333	132.3	7
Q80VP1	Epsin-1 (EPS-15-interacting protein 1) (Intersectin-EH-binding protein 1) (Ibp1)	Epn1	3	3	2.95652	60.2	3
Q3TMH2	Secernin-3	Scrn3	4	4	9.33014	47.6	5
Q571E4	N-acetylgalactosamine-6-sulfatase (EC 3.1.6.4) (Chondroitinsulfatase) (Chondroitinase) (Galactose-6-sulfate sulfatase) (N-acetylgalactosamine-6-sulfate sulfatase) (GalNAc6S sulfatase)	Galns	4	3	7.11538	57.6	4
Q6PA06	Atlastin-2 (EC 3.6.5.-) (ADP-ribosylation factor-like protein 6-interacting protein 2) (ARL-6-interacting protein 2) (Aip-2)	Atl2 Arl6ip2	5	5	8.91938	66.2	6
Q8C863	E3 ubiquitin-protein ligase Itchy (EC 2.3.2.26) (HECT-type E3 ubiquitin transferase Itchy homolog)	Itch	6	5	7.40741	98.9	6
Q6ZWV7	60S ribosomal protein L35	Rpl35	3	2	19.5122	14.5	3
F7C9H0	Periostin (Fragment)	Postn	4	2	46.0784	11.7	8
Q3ULF4	Paraplegin (EC 3.4.24.-) (Spastic paraplegia 7 protein)	Spg7	5	5	7.29834	85.9	5
O09118	Netrin-1	Ntn1	14	14	23.3444	67.8	26
D3YXF5	Complement component 7	C7	4	4	4.26036	93.3	5
Q3UH68	LIM and calponin homology domains-containing protein 1	Limch1 Kiaa1102	8	8	7.75781	118.1	9
Q8K215	LYR motif-containing protein 4	Lyrm4 Isd11	2	2	19.7802	10.8	2
Q9CPQ8	ATP synthase subunit g, mitochondrial (ATPase subunit g) (ATP synthase membrane subunit g)	Atp5mg Atp5l	2	2	33.0097	11.4	5
H3BJS0	Melanoma inhibitory activity protein 2	Mia2	8	8	9.44099	90.3	9
P17439	Lysosomal acid glucosylceramidase (Lysosomal acid GCase) (EC 3.2.1.45) (Acid beta-glucosidase) (Beta-glucocerebrosidase) (Cholesterol glucosyltransferase) (SGTase) (EC 2.4.1.-) (Cholesteryl-beta-glucosidase) (EC 3.2.1.104) (D-glucosyl-N-acylsphingosine glucohydrolase)	Gba	5	5	10.2913	57.6	5
Q9ET78	Junctophilin-2 (JP-2) (Junctophilin type 2) [Cleaved into: Junctophilin-2 N-terminal fragment (JP2NT)]	Jph2 Jp2	11	11	14.7989	74.6	13
Q3UX10	Tubulin alpha chain-like 3	Tubal3	4	1	8.29596	50	8
Q8BP48	Methionine aminopeptidase 1 (MAP 1) (MetAP 1) (EC 3.4.11.18) (Peptidase M 1)	Metap1	2	2	4.92228	43.2	4
Q99LB2	Dehydrogenase/reductase SDR family member 4 (EC 1.1.1.184) (NADPH-dependent carbonyl reductase/NADP-retinol dehydrogenase) (CR) (PHCR) (NADPH-dependent retinol dehydrogenase/reductase) (NDRD) (mouNRDR) (Peroxisomal short-chain alcohol dehydrogenase) (PSCD)	Dhrs4 D14Ucla2	4	4	12.9032	29.9	6
Q91V35	Receptor-type tyrosine-protein phosphatase alpha (EC 3.1.3.48)	Ptpra	4	4	5.42245	89.8	6
P70274	Selenoprotein P (SeP) (Plasma selenoprotein P)	Selenop Selp Sepp1	3	3	5.78947	42.7	4
G3X9T7	Galectin	Lgals9 mCG_1597	3	3	7.64873	40	5
P29351	Tyrosine-protein phosphatase non-receptor type 6 (EC 3.1.3.48) (70Z-SHP) (Hematopoietic cell protein-tyrosine phosphatase) (PTPTY-42) (Protein-tyrosine phosphatase 1C) (PTP-1C) (SH-PTP1) (SHP-1)	Ptpn6 Hcp Hcph Ptp1C	3	3	3.86555	67.5	4
Q61781	Keratin, type I cytoskeletal 14 (Cytokeratin-14) (CK-14) (Keratin-14) (K14)	Krt14 Krt1-14	10	4	14.2562	52.8	13
Q8C5W3	Tubulin-specific chaperone cofactor E-like protein (Leucine-rich repeat-containing protein 35)	Tbcel Lrrc35	5	5	12.5	48	6
Q9WVA3	Mitotic checkpoint protein BUB3 (WD repeat type I transmembrane protein A72.5)	Bub3	10	10	32.8221	36.9	13
O55242	Sigma non-opioid intracellular receptor 1 (Sigma 1-type opioid receptor) (Sigma1-receptor) (Sigma1R)	Sigmar1 Oprs1	3	3	14.7982	25.2	3
Q99KX1	Myeloid leukemia factor 2 (Myelodysplasia-myeloid leukemia factor 2)	Mlf2	6	6	24.2915	28	7
P31750	RAC-alpha serine/threonine-protein kinase (EC 2.7.11.1) (AKT1 kinase) (Protein kinase B) (PKB) (Protein kinase B alpha) (PKB alpha) (Proto-oncogene c-Akt) (RAC-PK-alpha) (Thymoma viral proto-oncogene)	Akt1 Akt Rac	7	6	12.7083	55.7	8
P32921	Tryptophan--tRNA ligase, cytoplasmic (EC 6.1.1.2) (Tryptophanyl-tRNA synthetase) (TrpRS) [Cleaved into: T1-TrpRS; T2-TrpRS]	Wars Wrs	9	9	22.0374	54.3	16
Q8CG03	cGMP-specific 3',5'-cyclic phosphodiesterase (EC 3.1.4.35) (cGMP-binding cGMP-specific phosphodiesterase) (CGB-PDE)	Pde5a Pde5	6	6	7.63006	98.3	6
P12242	Mitochondrial brown fat uncoupling protein 1 (UCP 1) (Solute carrier family 25 member 7) (Thermogenin)	Ucp1 Slc25a7 Ucp	14	14	54.0717	33.2	101
E9QP00	Transformer-2 protein homolog alpha	Tra2a	3	3	10.9929	32.6	4
A0A0R4J0J8	Cytospin-A (RIKEN cDNA 4932439K10, isoform CRA_a)	Specc1l 4932439K10Rik mCG_6000	7	6	5.81498	126.5	7
Q8R2Z5	von Willebrand factor A domain-containing protein 1 (von Willebrand factor A domain-related protein)	Vwa1 Warp	4	4	12.7711	44.7	7
O35379	Multidrug resistance-associated protein 1 (EC 7.6.2.2) (ATP-binding cassette sub-family C member 1) (Glutathione-S-conjugate-translocating ATPase ABCC1) (EC 7.6.2.3) (Leukotriene C(4) transporter) (LTC4 transporter)	Abcc1 Abcc1a Abcc1b Mdrap Mrp	9	9	6.21728	171.1	10
O08579	Emerin	Emd Sta	2	2	7.33591	29.4	3
A0A0R4J0J6	THO complex subunit 5 homolog	Thoc5	5	5	6.14934	78.7	5
P97355	Spermine synthase (SPMSY) (EC 2.5.1.22) (Spermidine aminopropyltransferase)	Sms	3	3	7.37705	41.3	4
P61358	60S ribosomal protein L27	Rpl27	3	3	30.1471	15.8	3
Q9CYW4	Haloacid dehalogenase-like hydrolase domain-containing protein 3	Hdhd3	3	3	11.5538	28	4
A0A0R4J0D1	Store-operated calcium entry-associated regulatory factor	Saraf	2	2	4.6832	38.7	2
Q8R4X3	RNA-binding protein 12 (RNA-binding motif protein 12) (SH3/WW domain anchor protein in the nucleus) (SWAN)	Rbm12	5	5	5.04032	102.7	5
Q80UW8	DNA-directed RNA polymerases I, II, and III subunit RPABC1 (RNA polymerases I, II, and III subunit ABC1) (DNA-directed RNA polymerase II subunit E) (RPB5 homolog)	Polr2e	3	3	16.1905	24.6	3
P62774	Myotrophin (Granule cell differentiation protein) (Protein V-1)	Mtpn Gcdp	3	3	27.1186	12.9	4
Q6PHQ9	Polyadenylate-binding protein (PABP)	Pabpc4 mCG_5546	6	4	8.93939	72.2	7
Q64FW2	All-trans-retinol 13,14-reductase (EC 1.3.99.23) (All-trans-13,14-dihydroretinol saturase) (RetSat) (PPAR-alpha-regulated and starvation-induced gene protein)	Retsat Ppsig	3	3	4.7619	67.3	3
Q9Z0E6	Guanylate-binding protein 2 (EC 3.6.5.-) (GTP-binding protein 2) (GBP-2) (mGBP-2) (mGBP2) (Guanine nucleotide-binding protein 2) (Interferon-induced guanylate-binding protein 2)	Gbp2	4	4	6.45161	66.7	8
P32020	Non-specific lipid-transfer protein (NSL-TP) (EC 2.3.1.176) (Propanoyl-CoA C-acyltransferase) (SCP-chi) (SCPX) (Sterol carrier protein 2) (SCP-2) (Sterol carrier protein X) (SCP-X)	Scp2 Scp-2	6	6	8.40951	59.1	7
Q91ZW3	SWI/SNF-related matrix-associated actin-dependent regulator of chromatin subfamily A member 5 (EC 3.6.4.-) (Sucrose nonfermenting protein 2 homolog) (mSnf2h)	Smarca5 Snf2h	6	6	4.85252	121.6	6
P25976	Nucleolar transcription factor 1 (Upstream-binding factor 1) (UBF-1)	Ubtf Tcfubf Ubf-1 Ubf1	4	4	6.66667	89.5	4
Q8VHM5	Heterogeneous nuclear ribonucleoprotein R	Hnrnpr Hnrpr	9	3	14.2405	70.8	16
Q9CQX8	28S ribosomal protein S36, mitochondrial (MRP-S36) (S36mt)	Mrps36	2	2	13.7255	11.1	2
P42232	Signal transducer and activator of transcription 5B	Stat5b	10	9	12.2137	89.9	12
Q9WV54	Acid ceramidase (AC) (ACDase) (Acid CDase) (EC 3.5.1.23) (Acylsphingosine deacylase) (N-acylethanolamine hydrolase ASAH1) (EC 3.5.1.-) (N-acylsphingosine amidohydrolase) [Cleaved into: Acid ceramidase subunit alpha; Acid ceramidase subunit beta]	Asah1 Asah	7	7	19.0355	44.6	9
A0A0R4J1Y3	Probable tRNA N6-adenosine threonylcarbamoyltransferase (EC 2.3.1.234) (O-sialoglycoprotein endopeptidase) (t(6)A37 threonylcarbamoyladenosine biosynthesis protein Osgep) (tRNA threonylcarbamoyladenosine biosynthesis protein Osgep)	Osgep OSGEP	3	3	10.4478	36.3	4
Q9R1T2	SUMO-activating enzyme subunit 1 (Ubiquitin-like 1-activating enzyme E1A) [Cleaved into: SUMO-activating enzyme subunit 1, N-terminally processed]	Sae1 Aos1 Sua1 Ubl1a1 Uble1a	8	8	23.1429	38.6	10
E9PVZ8	Golgi autoantigen, golgin subfamily b, macrogolgin 1	Golgb1	10	10	3.02656	369.9	11
P62983	Ubiquitin-40S ribosomal protein S27a (Ubiquitin carboxyl extension protein 80) [Cleaved into: Ubiquitin; 40S ribosomal protein S27a]	Rps27a Uba80 Ubcep1	8	8	50	17.9	142
P06797	Cathepsin L1 (EC 3.4.22.15) (Cathepsin L) (Major excreted protein) (MEP) (p39 cysteine proteinase) [Cleaved into: Cathepsin L1 heavy chain; Cathepsin L1 light chain]	Ctsl Ctsl1	3	3	5.38922	37.5	3
O70194	Eukaryotic translation initiation factor 3 subunit D (eIF3d) (Eukaryotic translation initiation factor 3 subunit 7) (eIF-3-zeta) (eIF3 p66)	Eif3d Eif3s7	6	6	10.4015	63.9	11
Q8CCB4	Vacuolar protein sorting-associated protein 53 homolog	Vps53	3	3	2.88462	94.4	3
P12815	Programmed cell death protein 6 (ALG-257) (Apoptosis-linked gene 2 protein) (ALG-2) (PMP41)	Pdcd6 Alg2	4	4	17.801	21.9	4
Q99LB6	Methionine adenosyltransferase 2 subunit beta (Methionine adenosyltransferase II beta) (MAT II beta)	Mat2b	5	5	14.6707	37.4	6
A0A140T8J4	Heme-binding protein 1	Hebp1 mCG_22258	3	3	22.1053	21	3
P70663	SPARC-like protein 1 (Extracellular matrix protein 2) (Matrix glycoprotein Sc1)	Sparcl1 Ecm2 Sc1	4	4	6.92308	72.2	6
Q9ESZ8	General transcription factor II-I (GTFII-I) (TFII-I) (Bruton tyrosine kinase-associated protein 135) (BAP-135) (BTK-associated protein 135)	Gtf2i Bap135 Diws1t	4	4	3.80762	112.2	4
Q8R5L1	Complement component 1 Q subcomponent-binding protein, mitochondrial (Complement component 1, q subcomponent binding protein) (Complement component 1, q subcomponent binding protein, isoform CRA_b) (p32-RACK)	C1qbp mCG_21176	3	3	15.7706	31	8
Q920Q6	RNA-binding protein Musashi homolog 2 (Musashi-2)	Msi2 Msi2h	3	3	10.6936	36.9	3
Q9JKL4	NADH dehydrogenase [ubiquinone] 1 alpha subcomplex assembly factor 3 (Protein 2P1)	Ndufaf3	6	6	44.8649	20.7	9
Q9QZN4	F-box only protein 6 (F-box only protein 6b) (F-box protein that recognizes sugar chains 2) (F-box/G-domain protein 2)	Fbxo6 Fbs2 Fbxo6b	4	4	14.5763	34.5	7
Q91XL9	Oxysterol-binding protein-related protein 1 (ORP-1) (OSBP-related protein 1)	Osbpl1a Orp1 Orp1a Orp1l	4	4	3.47368	107.7	4
Q8BMS4	Ubiquinone biosynthesis O-methyltransferase, mitochondrial (3-demethylubiquinol 3-O-methyltransferase) (EC 2.1.1.64) (Polyprenyldihydroxybenzoate methyltransferase) (EC 2.1.1.114)	Coq3	7	7	23.7838	40.9	10
Q99LC3	NADH dehydrogenase [ubiquinone] 1 alpha subcomplex subunit 10, mitochondrial (Complex I-42kD) (CI-42kD) (NADH-ubiquinone oxidoreductase 42 kDa subunit)	Ndufa10	11	11	30.1408	40.6	28
A0A1W2P6J7	Septin-10	Sept10 mCG_19014	7	5	13.2743	52.4	12
B1AVD2	Xaa-Pro aminopeptidase 2	Xpnpep2	4	4	4.72335	83.7	4
P61021	Ras-related protein Rab-5B	Rab5b	7	4	46.9767	23.7	13
P24270	Catalase (EC 1.11.1.6)	Cat Cas-1 Cas1	23	23	47.2486	59.8	46
P33434	72 kDa type IV collagenase (EC 3.4.24.24) (72 kDa gelatinase) (Gelatinase A) (Matrix metalloproteinase-2) (MMP-2) [Cleaved into: PEX]	Mmp2	4	4	7.0997	74.1	4
H3BLL2	ATP synthase mitochondrial F1 complex assembly factor 1 (MCG1262, isoform CRA_b)	Atpaf1 mCG_1262	2	2	5.17241	38.8	2
P26262	Plasma kallikrein (EC 3.4.21.34) (Fletcher factor) (Kininogenin) (Plasma prekallikrein) [Cleaved into: Plasma kallikrein heavy chain; Plasma kallikrein light chain]	Klkb1 Klk3 Pk	4	4	6.58307	71.3	4
B1ATY1	Actin, cytoplasmic 2	Actg1	12	1	69.281	16.7	181
Q9CYA0	Cysteine-rich with EGF-like domain protein 2	Creld2	5	5	16.5714	38.2	6
Q7TQD7	Myo1b protein (Unconventional myosin-Ib)	Myo1b	3	3	3.25704	132	4
Q3ULJ0	Glycerol-3-phosphate dehydrogenase 1-like protein (EC 1.1.1.8)	Gpd1l Kiaa0089	12	10	29.3447	38.2	19
Q9Z0K8	Pantetheinase (EC 3.5.1.92) (Pantetheine hydrolase) (Vascular non-inflammatory molecule 1) (Vanin-1)	Vnn1	3	3	6.05469	57.1	5
Q9ER00	Syntaxin-12	Stx12	7	7	31.7518	31.2	10
Q8VCW8	Acyl-CoA synthetase family member 2, mitochondrial (EC 6.2.1.-)	Acsf2	13	13	20.9756	67.9	21
Q9WTX8	Mitotic spindle assembly checkpoint protein MAD1 (Mitotic arrest deficient 1-like protein 1) (MAD1-like protein 1)	Mad1l1 Mad1	5	5	6.83403	83.5	5
P48453	Serine/threonine-protein phosphatase 2B catalytic subunit beta isoform (EC 3.1.3.16) (CAM-PRP catalytic subunit) (Calmodulin-dependent calcineurin A subunit beta isoform) (CNA beta)	Ppp3cb Calnb	5	2	10.6667	59.1	8
Q6GU68	Immunoglobulin superfamily containing leucine-rich repeat protein	Islr	6	6	14.7196	45.6	9
Q8C7E7	Starch-binding domain-containing protein 1 (Genethonin-1) (Glycophagy cargo receptor stbd1)	Stbd1 D5Ertd593e	6	6	15.9763	36.1	7
B1AQF4	Dual-specificity protein phosphatase 3	Dusp3	7	7	41.9048	23.2	15
Q6P3D0	U8 snoRNA-decapping enzyme (EC 3.6.1.62) (IDP phosphatase) (IDPase) (EC 3.6.1.64) (Inosine diphosphate phosphatase) (Nucleoside diphosphate-linked moiety X motif 16) (Nudix motif 16) (m7GpppN-mRNA hydrolase)	Nudt16	5	4	28.2051	21.8	8
F8VQ95	Transforming acidic coiled-coil-containing protein 1	Tacc1	10	8	10.3093	84.2	11
Q8BLY2	Threonine--tRNA ligase 2, cytoplasmic (EC 6.1.1.3) (Threonyl-tRNA synthetase) (ThrRS) (Threonyl-tRNA synthetase-like protein 2)	Tarsl2	6	5	5.94937	91.3	7
G5E8F8	Integrin beta	Itgb5 mCG_127131	11	11	13.2353	90	15
Q8BTV1	Tumor suppressor candidate 3 (Dolichyl-diphosphooligosaccharide--protein glycosyltransferase subunit TUSC3) (Oligosaccharyl transferase subunit TUSC3) (Magnesium uptake/transporter TUSC3) (Protein N33)	Tusc3 N33	4	4	10.0865	39.5	4
Q8R1U1	Conserved oligomeric Golgi complex subunit 4 (COG complex subunit 4) (Component of oligomeric Golgi complex 4)	Cog4	4	4	5.09554	88.6	4
E9Q0Y4	Signal-induced proliferation-associated protein 1	Sipa1	2	2	1.44509	112.2	2
Q9WVB0	RNA-binding protein with multiple splicing (RBP-MS) (Heart and RRM expressed sequence) (Hermes)	Rbpms Hermes	3	3	19.797	21.8	5
Q9CYG7	Mitochondrial import receptor subunit TOM34 (Translocase of outer membrane 34 kDa subunit)	Tomm34	4	4	16.8285	34.3	5
Q9DBB9	Carboxypeptidase N subunit 2 (Carboxypeptidase N 83 kDa chain) (Carboxypeptidase N large subunit) (Carboxypeptidase N polypeptide 2) (Carboxypeptidase N regulatory subunit)	Cpn2	4	4	8.40951	60.4	5
P46737	Lys-63-specific deubiquitinase BRCC36 (EC 3.4.19.-) (BRCA1-A complex subunit BRCC36) (BRCA1/BRCA2-containing complex subunit 3) (BRCA1/BRCA2-containing complex subunit 36) (BRISC complex subunit BRCC36)	Brcc3 Brcc36 C6.1a	4	4	12.3711	33.3	4
Q8R0F8	Acylpyruvase FAHD1, mitochondrial (EC 3.7.1.5) (Fumarylacetoacetate hydrolase domain-containing protein 1) (Oxaloacetate decarboxylase) (OAA decarboxylase) (EC 4.1.1.112)	Fahd1 MNCb-4134	4	4	12.7753	25.2	6
P30412	Peptidyl-prolyl cis-trans isomerase C (PPIase C) (EC 5.2.1.8) (Cyclophilin C) (Rotamase C)	Ppic Cypc	4	3	19.3396	22.8	9
Q9D7N3	28S ribosomal protein S9, mitochondrial (MRP-S9) (S9mt)	Mrps9	5	5	12.5641	44.9	7
Q9R190	Metastasis-associated protein MTA2 (Metastasis-associated 1-like 1)	Mta2 Mta1l1	9	8	13.1737	75	9
Q3UXS0	Secretory carrier-associated membrane protein (Secretory carrier membrane protein)	Scamp3	3	3	8.28571	38.6	4
P57680	Ellis-van Creveld syndrome protein homolog	Evc	5	5	4.47761	112.9	5
Q9CZE3	Ras-related protein Rab-32	Rab32	3	3	13.4529	25.1	4
Q9CR57	60S ribosomal protein L14	Rpl14	4	4	18.4332	23.5	9
Q8R4U7	Leucine zipper protein 1 (Leucine zipper motif-containing protein)	Luzp1 Luzp	2	2	1.40449	119.2	2
Q91VW5	Golgin subfamily A member 4 (tGolgin-1)	Golga4	8	7	3.12779	257.4	9
A0JNY3	Molybdopterin molybdenumtransferase (EC 2.10.1.1) [Includes: Molybdopterin adenylyltransferase (MPT adenylyltransferase) (EC 2.7.7.75) (Domain G); Molybdopterin molybdenumtransferase (MPT Mo-transferase) (EC 2.10.1.1) (Domain E)]	Gphn	7	7	12.3057	83.6	8
Q3U2A8	Valine--tRNA ligase, mitochondrial (EC 6.1.1.9) (Valyl-tRNA synthetase) (ValRS)	Vars2 Kiaa1885 Vars2l	2	2	2.16981	118.4	2
Q8K0G5	EARP and GARP complex-interacting protein 1 (Endosome-associated recycling protein-interacting protein) (Golgi-associated retrograde protein-interacting protein) (Tumor-suppressing STF cDNA 1 protein) (Tumor-suppressing subchromosomal transferable fragment candidate gene 1 protein)	Eipr1 Tssc1	3	3	7.51295	43.1	4
Q9CQ92	Mitochondrial fission 1 protein (FIS1 homolog) (Tetratricopeptide repeat protein 11) (TPR repeat protein 11)	Fis1 Ttc11	3	3	25	17	3
Q8VCT3	Aminopeptidase B (AP-B) (EC 3.4.11.6) (Arginine aminopeptidase) (Arginyl aminopeptidase) (Cytosol aminopeptidase IV)	Rnpep	15	15	24.6154	72.4	20
Q9WTL7	Acyl-protein thioesterase 2 (APT-2) (EC 3.1.2.-) (Lysophospholipase 2) (Lysophospholipase II) (LPL-II) (LysoPLA II) (mLyso II)	Lypla2	5	5	21.2121	24.8	8
Q9R0E2	Procollagen-lysine,2-oxoglutarate 5-dioxygenase 1 (EC 1.14.11.4) (Lysyl hydroxylase 1) (LH1)	Plod1 Plod	9	9	10.7143	83.5	11
Q9JIF0	Protein arginine N-methyltransferase 1 (EC 2.1.1.319) (Histone-arginine N-methyltransferase PRMT1)	Prmt1 Hrmt1l2 Mrmt1	4	4	10.2426	42.4	6
Q921W7	Testin (Testis derived transcript) (Testis derived transcript, isoform CRA_a)	Tes mCG_11251	13	13	31.5036	47.7	19
D3Z5F7	Predicted gene 20521	Gm20521 Pabpn1	3	3	8.10811	37.2	4
Q3UHZ7	UDP-N-acetylhexosamine pyrophosphorylase	Uap1	4	4	10.3448	58.5	5
Q6ZWU9	40S ribosomal protein S27	Rps27	2	2	25	9.5	3
Q8BGW1	Alpha-ketoglutarate-dependent dioxygenase FTO (Fat mass and obesity-associated protein) (Protein fatso) (U6 small nuclear RNA (2'-O-methyladenosine-N(6)-)-demethylase FTO) (EC 1.14.11.-) (U6 small nuclear RNA N(6)-methyladenosine-demethylase FTO) (EC 1.14.11.-) (mRNA (2'-O-methyladenosine-N(6)-)-demethylase FTO) (m6A(m)-demethylase FTO) (EC 1.14.11.-) (mRNA N(6)-methyladenosine demethylase FTO) (…	Fto Kiaa1752	3	3	4.58167	58	3
Q8JZR0	Long-chain-fatty-acid--CoA ligase 5 (EC 6.2.1.3) (Long-chain acyl-CoA synthetase 5) (LACS 5)	Acsl5 Facl5	9	7	13.47	76.2	16
Q3UPI1	Golgi-associated kinase 1B (Expressed in nerve and epithelium during development) (Protein FAM198B)	GaskbB Ened Fam198b	4	4	7.15667	58.3	4
B7ZN28	Papilin (Papln protein)	Papln	16	16	12.5192	141.3	22
Q8BGC4	Prostaglandin reductase-3 (PTGR-3) (EC 1.3.1.48) (15-oxoprostaglandin 13-reductase) (Zinc-binding alcohol dehydrogenase domain-containing protein 2)	Zadh2 Ptgr3	7	7	21.7507	40.5	15
Q8CDJ8	Stonin-1 (Stoned B-like factor)	Ston1 Salf Sblf Stn1	3	3	3.56164	81.7	3
P04627	Serine/threonine-protein kinase A-Raf (EC 2.7.11.1) (Proto-oncogene A-Raf)	Araf A-raf Araf1	3	3	5.62914	67.5	4
D3Z7Q2	Small integral membrane protein 20	Smim20 1810013D10Rik	2	2	20.2899	7.8	2
A0A0R4J0G4	Ran-binding protein 10	Ranbp10	3	3	4.78395	70	3
Q61409	cGMP-inhibited 3',5'-cyclic phosphodiesterase B (EC 3.1.4.17) (CGIPDE1) (Cyclic GMP-inhibited phosphodiesterase B) (CGI-PDE B)	Pde3b	5	4	5.18182	122.1	6
Q63844	Mitogen-activated protein kinase 3 (MAP kinase 3) (MAPK 3) (EC 2.7.11.24) (ERT2) (Extracellular signal-regulated kinase 1) (ERK-1) (Insulin-stimulated MAP2 kinase) (MAP kinase isoform p44) (p44-MAPK) (MNK1) (Microtubule-associated protein 2 kinase) (p44-ERK1)	Mapk3 Erk1 Prkm3	13	9	36.0526	43	22
P55065	Phospholipid transfer protein (Lipid transfer protein II)	Pltp	3	3	7.30223	54.4	3
E9QP99	Golgin subfamily A member 3	Golga3	7	7	4.16947	167.2	9
Q60996	Serine/threonine-protein phosphatase 2A 56 kDa regulatory subunit gamma isoform (PP2A B subunit isoform B'-alpha-3) (PP2A B subunit isoform B'-gamma) (PP2A B subunit isoform B56-gamma) (PP2A B subunit isoform PR61-gamma) (PP2A B subunit isoform R5-gamma)	Ppp2r5c	4	3	10.4962	60.8	4
Q9DC07	LIM zinc-binding domain-containing Nebulette (Actin-binding Z-disk protein)	Nebl Lnebl	6	6	27.7778	31.1	8
Q61739	Integrin alpha-6 (CD49 antigen-like family member F) (VLA-6) (CD antigen CD49f) [Cleaved into: Integrin alpha-6 heavy chain; Integrin alpha-6 light chain]	Itga6	7	7	6.50779	122.1	8
P98156	Very low-density lipoprotein receptor (VLDL receptor) (VLDL-R)	Vldlr	2	2	2.1764	96.3	2
Q80W21	Glutathione S-transferase Mu 7 (EC 2.5.1.18) (GST class-mu 7) (GSTM-7)	Gstm7	14	6	55.0459	25.7	45
G3UWS4	Serine/threonine-protein phosphatase 2A 65 kDa regulatory subunit A beta isoform	Ppp2r1b	12	4	17.2911	76	18
Q05117	Tartrate-resistant acid phosphatase type 5 (TR-AP) (EC 3.1.3.2) (Tartrate-resistant acid ATPase) (TrATPase) (Type 5 acid phosphatase)	Acp5 T5ap Trap	2	2	9.48012	36.8	3
Q9JKS4	LIM domain-binding protein 3 (Protein cypher) (Protein oracle) (Z-band alternatively spliced PDZ-motif protein)	Ldb3 Kiaa0613	12	12	19.3638	76.4	19
P47809	Dual specificity mitogen-activated protein kinase kinase 4 (MAP kinase kinase 4) (MAPKK 4) (EC 2.7.12.2) (C-JUN N-terminal kinase kinase 1) (JNK kinase 1) (JNKK 1) (JNK-activating kinase 1) (MAPK/ERK kinase 4) (MEK 4) (SAPK/ERK kinase 1) (SEK1)	Map2k4 Jnkk1 Mek4 Mkk4 Prkmk4 Sek1 Serk1 Skk1	4	4	9.82368	44.1	4
P27601	Guanine nucleotide-binding protein subunit alpha-13 (G alpha-13) (G-protein subunit alpha-13)	Gna13 Gna-13	11	10	33.4218	44	17
A0A0N4SUH8	NFU1 iron-sulfur cluster scaffold homolog, mitochondrial	Nfu1	4	4	18.75	28.6	7
P62264	40S ribosomal protein S14	Rps14	4	4	36.4238	16.3	10
P26450	Phosphatidylinositol 3-kinase regulatory subunit alpha (PI3-kinase regulatory subunit alpha) (PI3K regulatory subunit alpha) (PtdIns-3-kinase regulatory subunit alpha) (Phosphatidylinositol 3-kinase 85 kDa regulatory subunit alpha) (PI3-kinase subunit p85-alpha) (PtdIns-3-kinase regulatory subunit p85-alpha)	Pik3r1	5	5	6.35359	83.5	5
Q9CQF3	Cleavage and polyadenylation specificity factor subunit 5 (Nucleoside diphosphate-linked moiety X motif 21) (Nudix motif 21) (Nudix hydrolase 21)	Nudt21 Cpsf5	2	2	8.81057	26.2	2
Q9CX86	Heterogeneous nuclear ribonucleoprotein A0 (hnRNP A0)	Hnrnpa0 Hnrpa0	4	3	14.0984	30.5	7
D3Z0X5	Pleckstrin homology-like domain family B member 1	Phldb1	3	2	2.13941	158.6	3
A2A7Q5	Prolyl 3-hydroxylase 1	P3h1	5	5	7.62032	84.4	5
G5E829	Plasma membrane calcium-transporting ATPase 1 (EC 7.2.2.10) (Plasma membrane calcium ATPase isoform 1) (PMCA1) (Plasma membrane calcium pump isoform 1)	Atp2b1	13	6	13.8525	134.7	18
P97346	Nucleoredoxin (EC 1.8.1.8) (Protein Red-1)	Nxn Gn25	7	7	20.6897	48.3	9
A6H5Y3	Methionine synthase (EC 2.1.1.13) (5-methyltetrahydrofolate--homocysteine methyltransferase) (Vitamin-B12 dependent methionine synthase) (MS)	Mtr	5	5	3.91061	139	5
Q8BWM0	Prostaglandin E synthase 2 (EC 5.3.99.3) (GATE-binding factor 1) (GBF-1) (Microsomal prostaglandin E synthase 2) (mPGES-2) [Cleaved into: Prostaglandin E synthase 2 truncated form]	Ptges2 Gbf1 Pges2	10	10	27.3438	43.3	24
Q8R121	Protein Z-dependent protease inhibitor (PZ-dependent protease inhibitor) (PZI) (Serpin A10)	Serpina10 Zpi	5	5	9.59821	51.8	7
P17665	Cytochrome c oxidase subunit 7C, mitochondrial (Cytochrome c oxidase polypeptide VIIc)	Cox7c Cox7c1	2	2	28.5714	7.3	4
Q8BHA3	D-aminoacyl-tRNA deacylase 2 (EC 3.1.1.96) (Animalia-specific tRNA deacylase) (ATD) (D-tyrosyl-tRNA deacylase 2) (L-alanyl-tRNA deacylase) (EC 3.1.1.-)	Dtd2	3	3	19.6429	18.2	3
Q9JKF7	39S ribosomal protein L39, mitochondrial (L39mt) (MRP-L39)	Mrpl39	7	7	19.0476	38.5	8
Q91WM2	Haloacid dehalogenase-like hydrolase domain-containing 5 (Cat eye syndrome critical region protein 5 homolog)	Hdhd5 Cecr5	5	5	14.5585	46.3	6
Q61599	Rho GDP-dissociation inhibitor 2 (Rho GDI 2) (D4) (Rho-GDI beta)	Arhgdib Gdid4	1	1	3	22.8	2
Q9JJ28	Protein flightless-1 homolog	Flii Fli1 Fliih	10	10	8.89064	144.7	17
Q99M51	Cytoplasmic protein NCK1 (NCK adaptor protein 1) (Nck-1)	Nck1	4	3	8.75332	42.9	4
Q6NZR5	Superkiller viralicidic activity 2-like (S. cerevisiae)	Skiv2l	6	5	4.90354	137.4	9
I7HJQ9	Myotubularin-related protein 1	Mtmr1	2	2	2.23547	75.5	2
Q9DBL9	1-acylglycerol-3-phosphate O-acyltransferase ABHD5 (EC 2.3.1.51) (Abhydrolase domain-containing protein 5) (Lipid droplet-binding protein CGI-58) (Protein CGI-58)	Abhd5	3	3	12.8205	39.1	7
P70699	Lysosomal alpha-glucosidase (EC 3.2.1.20) (Acid maltase)	Gaa	8	8	10.0735	106.2	9
O35598	Disintegrin and metalloproteinase domain-containing protein 10 (ADAM 10) (EC 3.4.24.81) (Kuzbanian protein homolog) (Mammalian disintegrin-metalloprotease) (CD antigen CD156c)	Adam10 Kuz Madm	1	1	1.86916	83.9	2
Q9DBM2	Peroxisomal bifunctional enzyme (PBE) (PBFE) [Includes: Enoyl-CoA hydratase/3,2-trans-enoyl-CoA isomerase (EC 4.2.1.17) (EC 5.3.3.8); 3-hydroxyacyl-CoA dehydrogenase (EC 1.1.1.35)]	Ehhadh	13	13	20.6128	78.3	19
O55201	Transcription elongation factor SPT5 (DRB sensitivity-inducing factor large subunit) (DSIF large subunit)	Supt5h Supt5	3	3	3.41959	120.6	4
E9QAX2	Unconventional myosin-XVIIIa	Myo18a	11	11	5.28084	235.7	11
Q3UHI4	Protein TMED8	Tmed8	2	2	4.90798	35.8	2
E9Q6H8	Pleckstrin homology domain-containing, family A member 5	Plekha5	4	4	2.83688	144.3	4
P19123	Troponin C, slow skeletal and cardiac muscles (TN-C)	Tnnc1 Tncc	7	7	42.236	18.4	12
O54833	Casein kinase II subunit alpha' (CK II alpha') (EC 2.7.11.1)	Csnk2a2	6	5	14.8571	41.2	7
Q8CG76	Aflatoxin B1 aldehyde reductase member 2 (EC 1.1.1.n11) (Succinic semialdehyde reductase) (SSA reductase)	Akr7a2 Afar Akr7a5	10	10	27.248	40.6	19
Q00898	Alpha-1-antitrypsin 1-5 (Alpha-1 protease inhibitor 5) (Serine protease inhibitor 1-5) (Serine protease inhibitor A1e) (Serpin A1e)	Serpina1e Dom5 Spi1-5	11	3	28.0872	45.9	44
A0A0R4J1J1	MCG114807, isoform CRA_c (Probable hydrolase PNKD)	Pnkd mCG_114807	2	2	19.7183	15.6	3
Q810A7	ATP-dependent RNA helicase DDX42 (EC 3.6.4.13) (DEAD box protein 42)	Ddx42	2	2	1.507	101.9	2
O70250	Phosphoglycerate mutase 2 (EC 5.4.2.11) (EC 5.4.2.4) (BPG-dependent PGAM 2) (Muscle-specific phosphoglycerate mutase) (Phosphoglycerate mutase isozyme M) (PGAM-M)	Pgam2	7	3	23.7154	28.8	15
Q8BWF0	Succinate-semialdehyde dehydrogenase, mitochondrial (EC 1.2.1.24) (Aldehyde dehydrogenase family 5 member A1) (NAD(+)-dependent succinic semialdehyde dehydrogenase)	Aldh5a1	7	7	14.914	55.9	10
A2AEW8	GRIP1-associated protein 1 (Gripap1 protein)	Gripap1	4	4	4.30108	95.9	4
A0A023T778	Mago nashi protein (Protein mago nashi homolog 2) (RIKEN cDNA 2010012C16, isoform CRA_c)	Magohb 2010012C16Rik mCG_21486	4	4	29.7297	17.3	4
Q8BJE2	Butyrophilin-like protein 9	Btnl9	9	9	16.0448	60.5	11
Q5DTM8	E3 ubiquitin-protein ligase BRE1A (BRE1-A) (EC 2.3.2.27) (RING finger protein 20) (RING-type E3 ubiquitin transferase BRE1A)	Rnf20 Bre1a Kiaa4116	4	3	4.83042	113.5	4
P34914	Bifunctional epoxide hydrolase 2 [Includes: Cytosolic epoxide hydrolase 2 (CEH) (EC 3.3.2.10) (Epoxide hydratase) (Soluble epoxide hydrolase) (SEH); Lipid-phosphate phosphatase (EC 3.1.3.76)]	Ephx2 Eph2	11	11	25.9928	62.5	25
Q8K1I3	Secreted phosphoprotein 24 (Spp-24) (Secreted phosphoprotein 2)	Spp2 Spp24	3	3	14.2857	23.1	3
Q9QVP4	Myosin regulatory light chain 2, atrial isoform (MLC-2a) (MLC2a) (Myosin light chain 2a) (Myosin regulatory light chain 7)	Myl7 Mylc2a	9	9	60.5714	19.4	23
Q8K411	Presequence protease, mitochondrial (EC 3.4.24.-) (Pitrilysin metalloproteinase 1)	Pitrm1 Kiaa1104 Ntup1	10	10	7.91506	117.3	13
Q6P1B9	Bin1 protein (Myc box-dependent-interacting protein 1)	Bin1	7	7	16.5618	52.7	11
Q6QD59	Vesicle transport protein SEC20	Bnip1 Sec20 Sec20l	3	3	13.1579	26.2	5
P56393	Cytochrome c oxidase subunit 7B, mitochondrial (Cytochrome c oxidase polypeptide VIIb)	Cox7b	1	1	8.75	9	2
Q8BH79	Anoctamin-10 (Transmembrane protein 16K)	Ano10 Tmem16k	7	6	10.4704	76.1	9
Q64314	Hematopoietic progenitor cell antigen CD34 (CD antigen CD34)	Cd34	3	3	9.42408	41	4
Q8K1I7	WAS/WASL-interacting protein family member 1 (Wiskott-Aldrich syndrome protein-interacting protein) (WASP-interacting protein)	Wipf1 Waspip Wip	2	2	3.44828	50.1	2
Q8R180	ERO1-like protein alpha (ERO1-L) (ERO1-L-alpha) (EC 1.8.4.-) (Endoplasmic reticulum oxidoreductase alpha) (Endoplasmic reticulum oxidoreductin-1-like protein) (Oxidoreductin-1-L-alpha)	Ero1a Ero1l	8	8	16.1638	54.1	11
Q9Z110	Delta-1-pyrroline-5-carboxylate synthase (P5CS) (Aldehyde dehydrogenase family 18 member A1) [Includes: Glutamate 5-kinase (GK) (EC 2.7.2.11) (Gamma-glutamyl kinase); Gamma-glutamyl phosphate reductase (GPR) (EC 1.2.1.41) (Glutamate-5-semialdehyde dehydrogenase) (Glutamyl-gamma-semialdehyde dehydrogenase)]	Aldh18a1 P5cs Pycs	4	4	6.03774	87.2	4
Q9JMC3	DnaJ homolog subfamily A member 4 (MmDjA4)	Dnaja4	3	3	7.0529	44.9	3
Q91X52	L-xylulose reductase (XR) (EC 1.1.1.10) (Dicarbonyl/L-xylulose reductase)	Dcxr	4	3	17.623	25.7	9
Q8C8U0	Liprin-beta-1 (Protein tyrosine phosphatase receptor type f polypeptide-interacting protein-binding protein 1) (PTPRF-interacting protein-binding protein 1)	Ppfibp1 Kiaa1230	10	10	10.1135	108.5	13
Q91VC9	Growth hormone-inducible transmembrane protein (Mitochondrial morphology and cristae structure 1) (MICS1)	Ghitm Mics1	2	2	6.06936	37.3	3
E9PZW8	Unconventional myosin-IXb	Myo9b	4	4	1.50376	240.2	4
A6X935	Inter alpha-trypsin inhibitor, heavy chain 4 (ITI heavy chain H4) (ITI-HC4) (Inter-alpha-inhibitor heavy chain 4)	Itih4	21	21	21.4437	104.6	35
O08583	THO complex subunit 4 (Tho4) (Ally of AML-1 and LEF-1) (Aly/REF export factor) (REF1-I) (RNA and export factor-binding protein 1) (Transcriptional coactivator Aly/REF)	Alyref Aly Ref1 Refbp1 THOC4	3	3	14.1176	26.9	4
P01783	Deleted.		1	1	8.08824	15.1	4
O35682	Myeloid-associated differentiation marker (Myeloid up-regulated protein)	Myadm Mug	3	3	12.5	35.3	9
Q99JF8	PC4 and SFRS1-interacting protein (Lens epithelium-derived growth factor) (mLEDGF)	Psip1 Ledgf	5	4	7.38636	59.7	7
Q8BGX2	Mitochondrial import inner membrane translocase subunit Tim29 (TIM29)	Timm29	6	6	26.6917	29.4	7
O54774	AP-3 complex subunit delta-1 (AP-3 complex subunit delta) (Adaptor-related protein complex 3 subunit delta-1) (Delta-adaptin) (mBLVR1)	Ap3d1 Ap3d	3	3	2.41868	135	3
Q62356	Follistatin-related protein 1 (Follistatin-like protein 1) (TGF-beta-inducible protein TSC-36)	Fstl1 Frp Fstl Tsc36	3	3	8.82353	34.5	4
P24788	Cyclin-dependent kinase 11B (Cell division cycle 2-like protein kinase 1) (Cell division protein kinase 11) (Cyclin-dependent kinase 11) (EC 2.7.11.22) (Galactosyltransferase-associated protein kinase p58/GTA) (PITSLRE serine/threonine-protein kinase CDC2L1)	Cdk11b Cdc2l1 Cdk11	4	3	4.46429	91.5	5
Q80ZW2	Protein THEM6	Them6	1	1	3.38164	23.8	1
Q9R0E1	Multifunctional procollagen lysine hydroxylase and glycosyltransferase LH3 [Includes: Procollagen-lysine,2-oxoglutarate 5-dioxygenase 3 (EC 1.14.11.4) (Lysyl hydroxylase 3) (LH3); Procollagen glycosyltransferase (EC 2.4.1.50) (EC 2.4.1.66) (Galactosylhydroxylysine-glucosyltransferase) (Procollagen galactosyltransferase) (Procollagen glucosyltransferase)]	Plod3	12	12	16.1943	84.9	13
E9QNE5	Peptidase inhibitor 16	Pi16	5	5	9.63855	53.6	11
Q8BH35	Complement component C8 beta chain (Complement component 8 subunit beta)	C8b	6	6	13.9219	66.2	10
Q5U3K5	Rab-like protein 6 (GTP-binding protein Parf) (Rab-like protein 1) (RBEL1)	Rabl6 Parf	2	2	1.93103	79.8	2
O54941	SWI/SNF-related matrix-associated actin-dependent regulator of chromatin subfamily E member 1 (BRG1-associated factor 57) (BAF57)	Smarce1 Baf57	7	6	18.0049	46.6	10
Q62313	Trans-Golgi network integral membrane protein 1 (TGN38A)	Tgoln1 Ttgn1	3	3	8.2153	37.8	4
P61028	Ras-related protein Rab-8B	Rab8b	7	2	31.8841	23.6	15
P63011	Ras-related protein Rab-3A	Rab3a	5	3	26.8182	25	11
P52760	2-iminobutanoate/2-iminopropanoate deaminase (EC 3.5.99.10) (Heat-responsive protein 12) (Reactive intermediate imine deaminase A homolog) (Translation inhibitor L-PSP ribonuclease)	Rida Hrp12	3	3	25.1852	14.2	4
Q3UIA2	Rho GTPase-activating protein 17 (Neuron-associated developmentally-regulated protein) (Nadrin) (Rho-type GTPase-activating protein 17)	Arhgap17	4	4	4.37352	92.1	5
P62320	Small nuclear ribonucleoprotein Sm D3 (Sm-D3) (snRNP core protein D3)	Snrpd3	3	3	31.746	13.9	11
O88738	Baculoviral IAP repeat-containing protein 6 (EC 2.3.2.27) (BIR repeat-containing ubiquitin-conjugating enzyme) (BRUCE) (RING-type E3 ubiquitin transferase BIRC6) (Ubiquitin-conjugating BIR domain enzyme apollon) (APOLLON)	Birc6 Kiaa1289	7	7	1.33142	531.8	8
Q570Y9	DEP domain-containing mTOR-interacting protein (DEP domain-containing protein 6)	Deptor Depdc6 Kiaa4200	2	2	6.84597	46.1	3
Q14DH7	Acyl-CoA synthetase short-chain family member 3, mitochondrial (EC 6.2.1.1)	Acss3	12	12	15.8358	74.5	18
Q5SSL4	Active breakpoint cluster region-related protein	Abr	4	4	4.42375	97.6	5
Q80YC5	Coagulation factor XII (EC 3.4.21.38) (Hageman factor) (HAF) [Cleaved into: Coagulation factor XIIa heavy chain; Coagulation factor XIIa light chain]	F12	7	7	11.8928	65.7	9
H3BJW3	Cleavage and polyadenylation-specificity factor subunit 6	Cpsf6	3	3	6.46259	63.4	4
G3X972	SEC24 related gene family, member C (S. cerevisiae), isoform CRA_a (Sec24-related gene family, member C (S. cerevisiae))	Sec24c mCG_121333	7	7	9.03285	118.5	8
Q8C5H8	NAD kinase 2, mitochondrial (EC 2.7.1.23) (Mitochondrial NAD kinase) (NAD kinase domain-containing protein 1, mitochondrial)	Nadk2 Mnadk Nadkd1	5	5	13.2743	50.8	6
Q9DAK9	14 kDa phosphohistidine phosphatase (EC 3.9.1.3) (Phosphohistidine phosphatase 1) (PHPT1) (Protein histidine phosphatase) (PHP)	Phpt1 Php14	5	5	37.9032	14	7
P35276	Ras-related protein Rab-3D	Rab3d	6	4	28.7671	24.4	15
Q9R045	Angiopoietin-related protein 2 (Angiopoietin-like protein 2)	Angptl2 Arp2	5	5	10.142	57.1	6
Q925F2	Endothelial cell-selective adhesion molecule	Esam Esam1	2	2	6.09137	41.8	3
P11930	Nucleoside diphosphate-linked moiety X motif 19 (Nudix motif 19) (EC 3.6.1.-) (Androgen-regulated protein RP2) (Testosterone-regulated RP2 protein) (RP2p)	Nudt19 D7Rp2e	2	2	6.16246	40.3	3
Q8R1X6	Spartin	Spart Kiaa0610 Spg20	3	3	6.11028	72.6	3
Q8BMA6	Signal recognition particle subunit SRP68 (SRP68) (Signal recognition particle 68 kDa protein)	Srp68	7	7	10.4	70.5	9
Q99NB1	Acetyl-coenzyme A synthetase 2-like, mitochondrial (EC 6.2.1.1) (Acetate--CoA ligase 2) (Acetyl-CoA synthetase 2) (AceCS2) (Acyl-CoA synthetase short-chain family member 1)	Acss1 Acas2 Acas2l	11	11	18.0352	74.6	13
G3X8T9	Serine (Or cysteine) peptidase inhibitor, clade A, member 3N, isoform CRA_a (Serine protease inhibitor A3N)	Serpina3n mCG_3346	13	10	35.1675	46.7	27
A0A0R4J0W6	Leucine rich repeat containing 40, isoform CRA_a (Leucine-rich repeat-containing protein 40)	Lrrc40 mCG_11659	4	4	8.13953	68	5
Q8BTI8	Serine/arginine repetitive matrix protein 2	Srrm2 Kiaa0324	5	5	1.47984	294.7	5
Q64511	DNA topoisomerase 2-beta (EC 5.6.2.3) (DNA topoisomerase II, beta isozyme)	Top2b	10	10	6.14144	181.8	12
Q8BGF6	ELMO domain-containing protein 2	Elmod2	2	2	6.14334	34.7	3
A2AJI0	MAP7 domain-containing protein 1	Map7d1 Kiaa1187 Mtap7d1	5	5	7.0922	93.2	6
Q9D6J6	NADH dehydrogenase [ubiquinone] flavoprotein 2, mitochondrial (EC 1.6.99.3) (EC 7.1.1.2) (NADH-ubiquinone oxidoreductase 24 kDa subunit)	Ndufv2	10	10	47.5806	27.3	33
P70318	Nucleolysin TIAR (TIA-1-related protein)	Tial1	2	2	5.61224	43.4	3
A0A0R4J0J7	MAM domain-containing protein 2	Mamdc2	6	6	9.91254	77.3	7
Q9CQM5	Thioredoxin domain-containing protein 17 (14 kDa thioredoxin-related protein) (TRP14) (Protein 42-9-9) (Thioredoxin-like protein 5)	Txndc17 Txnl5	4	4	32.5203	14	4
Q2TPA8	Hydroxysteroid dehydrogenase-like protein 2 (EC 1.-.-.-)	Hsdl2	8	8	19.1837	54.2	12
Q6XLQ8	Calumenin (Calumenin, isoform CRA_b) (Cardiac calumenin isoform)	Calu mCG_9131	12	2	43.4921	37.1	27
A2AIX1	Protein transport protein Sec16A (SEC16 homolog A) (p250)	Sec16a Kiaa0310 Sec16	3	3	1.68279	256.3	3
O35114	Lysosome membrane protein 2 (85 kDa lysosomal membrane sialoglycoprotein) (LGP85) (Lysosome membrane protein II) (LIMP II) (Scavenger receptor class B member 2)	Scarb2	5	5	11.2971	54	10
Q7TQ48	Sarcalumenin	Srl Sar	8	8	10.1099	99.1	11
Q8C0L8	Conserved oligomeric Golgi complex subunit 5 (COG complex subunit 5) (Component of oligomeric Golgi complex 5)	Cog5	4	4	4.94572	91.3	6
Q9QXB9	Developmentally-regulated GTP-binding protein 2 (DRG-2) (Translation factor GTPase DRG2) (TRAFAC GTPase DRG2) (EC 3.6.5.-)	Drg2	5	5	14.2857	40.7	5
Q9DCZ1	GMP reductase 1 (GMPR 1) (EC 1.7.1.7) (Guanosine 5'-monophosphate oxidoreductase 1) (Guanosine monophosphate reductase 1)	Gmpr Gmpr1	5	4	13.6232	37.5	7
Q8K4F5	Protein ABHD11 (EC 3.-.-.-) (Alpha/beta hydrolase domain-containing protein 11) (Abhydrolase domain-containing protein 11) (Williams-Beuren syndrome chromosomal region 21 protein homolog)	Abhd11 Wbscr21	3	3	8.79479	33.5	4
P51660	Peroxisomal multifunctional enzyme type 2 (MFE-2) (17-beta-hydroxysteroid dehydrogenase 4) (17-beta-HSD 4) (D-bifunctional protein) (DBP) (Multifunctional protein 2) (MPF-2) [Cleaved into: (3R)-hydroxyacyl-CoA dehydrogenase (EC 1.1.1.n12); Enoyl-CoA hydratase 2 (EC 4.2.1.107) (EC 4.2.1.119) (3-alpha,7-alpha,12-alpha-trihydroxy-5-beta-cholest-24-enoyl-CoA hydratase)]	Hsd17b4 Edh17b4	18	18	24.6259	79.4	30
P29533	Vascular cell adhesion protein 1 (V-CAM 1) (VCAM-1) (CD antigen CD106)	Vcam1 Vcam-1	6	6	8.66035	81.3	6
Q3TIR1	Trafficking protein particle complex subunit 13	Trappc13	4	4	7.91367	46.4	4
Q8BK72	28S ribosomal protein S27, mitochondrial (MRP-S27) (S27mt) (Mitochondrial ribosomal protein S27)	Mrps27	9	9	20.9639	47.7	10
E9PUF7	Rho guanine nucleotide exchange factor 1	Arhgef1	14	14	15.3689	108.6	20
Q9JKW0	ADP-ribosylation factor-like protein 6-interacting protein 1 (ARL-6-interacting protein 1) (Aip-1) (Protein TBX2)	Arl6ip1 Arl6ip	2	2	8.867	23.4	3
P62911	60S ribosomal protein L32	Rpl32	5	5	28.8889	15.9	7
Q80U72	Protein scribble homolog (Scribble) (Protein LAP4)	Scrib Kiaa0147 Lap4 Scrib1	6	4	3.72208	174	7
Q99JY8	Phospholipid phosphatase 3 (EC 3.1.3.4) (Lipid phosphate phosphohydrolase 3) (PAP2-beta) (Phosphatidate phosphohydrolase type 2b) (Phosphatidic acid phosphatase 2b) (PAP-2b) (PAP2b)	Plpp3 Lpp3 Ppap2b	2	2	6.73077	35.2	3
P46656	Adrenodoxin, mitochondrial (Adrenal ferredoxin) (Ferredoxin-1)	Fdx1	4	4	18.0851	20.1	6
E9QJW0	Microsomal glutathione S-transferase 1	Mgst1	1	1	5.67686	25.8	3
Q9DAR7	m7GpppX diphosphatase (EC 3.6.1.59) (DCS-1) (Decapping scavenger enzyme) (Hint-related 7meGMP-directed hydrolase) (Histidine triad nucleotide-binding protein 5) (Histidine triad protein member 5) (HINT-5) (Scavenger mRNA-decapping enzyme DcpS)	Dcps Dcs1 Hint5	6	6	18.6391	39	8
B1ASP2	Tyrosine-protein kinase (EC 2.7.10.2)	Jak1 mCG_21706	4	3	2.77537	133.3	4
P56501	Mitochondrial uncoupling protein 3 (UCP 3) (Solute carrier family 25 member 9)	Ucp3 Slc25a9	3	3	10.0649	33.9	4
Q8R4K2	Interleukin-1 receptor-associated kinase 4 (IRAK-4) (EC 2.7.11.1)	Irak4	3	3	5.88235	50.8	4
A2AKN8	Major urinary protein 5 (Major urinary protein 8)	Mup8 Mup5 OTTMUSG00000008509	7	1	35.5556	20.6	15
A2AQJ8	Neutral alpha-glucosidase C	Ganc	3	3	3.3954	103.6	3
Q9D2V8	Major facilitator superfamily domain-containing protein 10 (Tetracycline transporter-like protein)	Mfsd10 Tetran	4	4	10.5263	49.3	7
A0A1B0GRV0	3'(2'),5'-bisphosphate nucleotidase 1	Bpnt1	8	1	30.6502	35	13
Q6PB44	Tyrosine-protein phosphatase non-receptor type 23 (EC 3.1.3.48)	Ptpn23 Kiaa1471	11	11	6.85579	185.1	14
B1AZP2	Disks large-associated protein 4 (DAP-4) (PSD-95/SAP90-binding protein 4) (SAP90/PSD-95-associated protein 4) (SAPAP-4)	Dlgap4 Kiaa0964 Sapap4	2	2	1.5121	108	2
A0A0R4J086	Olfactomedin-like protein 3	Olfml3	4	4	10.5911	45.8	5
Q80X80	Phospholipid transfer protein C2CD2L (C2 domain-containing protein 2-like) (Transmembrane protein 24)	C2cd2l Tmem24	2	2	2.54958	76.3	3
D3Z7P3	Glutaminase kidney isoform, mitochondrial (GLS) (EC 3.5.1.2) [Cleaved into: Glutaminase kidney isoform, mitochondrial 68 kDa chain; Glutaminase kidney isoform, mitochondrial 65 kDa chain]	Gls Gls1 Kiaa0838	9	9	15.2819	73.9	11
Q9D7M1	Glucose-induced degradation protein 8 homolog (Two hybrid-associated protein 1 with RanBPM) (Twa1)	Gid8	3	3	16.2281	26.8	3
Q60823	RAC-beta serine/threonine-protein kinase (EC 2.7.11.1) (Protein kinase Akt-2) (Protein kinase B beta) (PKB beta) (RAC-PK-beta)	Akt2	6	5	12.474	55.7	8
F8WGM3	Epsilon-sarcoglycan	Sgce	6	6	14.4124	51.2	10
Q9D236	Serine protease HTRA3 (EC 3.4.21.-) (High-temperature requirement factor A3) (Pregnancy-related serine protease) (Toll-associated serine protease)	Htra3 Prsp Tasp	4	4	8.061	49.1	5
Q3U319	E3 ubiquitin-protein ligase BRE1B (BRE1-B) (EC 2.3.2.27) (RING finger protein 40) (RING-type E3 ubiquitin transferase BRE1B)	Rnf40 Bre1b Kiaa0661	3	2	3.4965	113.9	3
O35664	Interferon alpha/beta receptor 2 (IFN-R-2) (IFN-alpha/beta receptor 2) (Type I interferon receptor 2)	Ifnar2	2	2	3.31384	56.5	2
Q9DAM5	Mitochondrial thiamine pyrophosphate carrier (Solute carrier family 25 member 19)	Slc25a19	5	5	15.7233	35.6	8
Q07113	Cation-independent mannose-6-phosphate receptor (CI Man-6-P receptor) (CI-MPR) (M6PR) (300 kDa mannose 6-phosphate receptor) (MPR 300) (Insulin-like growth factor 2 receptor) (Insulin-like growth factor II receptor) (IGF-II receptor) (M6P/IGF2 receptor) (M6P/IGF2R) (CD antigen CD222)	Igf2r	10	10	4.02739	273.6	10
F6WMJ3	Rho guanine nucleotide exchange factor 6	Arhgef6	4	3	5.15723	89.8	4
A0A0R4J0P1	Acyl-Coenzyme A dehydrogenase family, member 8 (Isobutyryl-CoA dehydrogenase, mitochondrial)	Acad8 mCG_9853	12	12	34.1404	45.1	15
Q3U3K9	Ancient ubiquitous protein 1	Aup1	5	5	8.88383	49.3	6
Q9QYI3	DnaJ homolog subfamily C member 7 (Cytoplasmic CAR retention protein) (CCRP) (MDj11) (Tetratricopeptide repeat protein 2) (TPR repeat protein 2)	Dnajc7 Ttc2	7	7	13.7652	56.4	8
Q8C1Y8	Vacuolar fusion protein CCZ1 homolog	Ccz1	1	1	2.70833	55.5	2
P70452	Syntaxin-4	Stx4 Stx4a	4	4	12.0805	34.1	5
A3KGB4	TBC1 domain family member 8B	Tbc1d8b	4	3	2.87253	127.8	4
Q8BH69	Selenide, water dikinase 1 (EC 2.7.9.3) (Selenium donor protein 1) (Selenophosphate synthase 1)	Sephs1 Sps1	5	5	19.6429	42.9	6
Q8C0E3	E3 ubiquitin-protein ligase TRIM47 (EC 2.3.2.27) (Tripartite motif-containing protein 47)	Trim47	10	10	19.1888	69.9	15
Q8VE95	UPF0598 protein C8orf82 homolog		5	5	27.0642	24.3	9
Q07456	Protein AMBP [Cleaved into: Alpha-1-microglobulin; Inter-alpha-trypsin inhibitor light chain (ITI-LC) (Bikunin) (HI-30); Trypstatin]	Ambp Itil	8	8	22.063	39	13
P05366	Serum amyloid A-1 protein	Saa1	3	1	22.1311	13.8	5
Q8R242	Di-N-acetylchitobiase (EC 3.2.1.-)	Ctbs	2	2	5.7377	41.3	2
O09110	Dual specificity mitogen-activated protein kinase kinase 3 (MAP kinase kinase 3) (MAPKK 3) (EC 2.7.12.2) (MAPK/ERK kinase 3) (MEK 3)	Map2k3 Mkk3 Prkmk3	1	1	2.30548	39.3	1
Q8C7R4	Ubiquitin-like modifier-activating enzyme 6 (Ubiquitin-activating enzyme 6) (EC 6.2.1.45) (Ubiquitin-activating enzyme E1-like protein 2) (E1-L2)	Uba6 Ube1l2	8	8	8.45204	117.9	8
Q9DCV7	Keratin, type II cytoskeletal 7 (Cytokeratin-7) (CK-7) (Keratin-7) (K7) (Type-II keratin Kb7)	Krt7 Krt2-7	12	8	23.6324	50.7	37
Q62384	Zinc finger protein ZPR1 (Zinc finger protein 259)	Zpr1 Zfp259 Znf259	5	5	9.15033	50.7	5
Q64299	CCN family member 3 (Cellular communication network factor 3) (Nephroblastoma-overexpressed gene protein homolog) (Protein NOV homolog) (NovH)	Ccn3 Nov	6	6	22.3164	38.9	6
Q3B7Z2	Oxysterol-binding protein 1	Osbp Kiaa4220	13	13	21.2422	88.7	13
Q9D0T1	NHP2-like protein 1 (Fertilization antigen 1) (FA-1) (High mobility group-like nuclear protein 2 homolog 1) (Sperm-specific antigen 1) (U4/U6.U5 small nuclear ribonucleoprotein SNU13) (U4/U6.U5 tri-snRNP 15.5 kDa protein) [Cleaved into: NHP2-like protein 1, N-terminally processed]	Snu13 Nhp2l1 Ssfa1	2	2	15.625	14.2	4
P03953	Complement factor D (EC 3.4.21.46) (28 kDa adipocyte protein) (Adipsin) (C3 convertase activator) (Properdin factor D)	Cfd Adn Df	3	3	18.9189	28	9
Q3UIU2	NADH dehydrogenase [ubiquinone] 1 beta subcomplex subunit 6 (Complex I-B17) (CI-B17) (NADH-ubiquinone oxidoreductase B17 subunit)	Ndufb6 Gm137	7	7	43.75	15.5	35
Q8VC52	RNA-binding protein with multiple splicing 2	Rbpms2	2	2	10.1942	22.4	3
Q9R269	Periplakin	Ppl	20	20	10.8832	203.9	21
Q3TDD9	Protein phosphatase 1 regulatory subunit 21 (Coiled-coil domain-containing protein 128) (KLRAQ motif-containing protein 1)	Ppp1r21 Ccdc128 Klraq1	3	3	3.07692	88.3	3
P09925	Surfeit locus protein 1	Surf1 Surf-1	2	2	4.57516	34.8	2
P07742	Ribonucleoside-diphosphate reductase large subunit (EC 1.17.4.1) (Ribonucleoside-diphosphate reductase subunit M1) (Ribonucleotide reductase large subunit)	Rrm1	2	2	2.14646	90.2	2
O09012	Peroxisomal targeting signal 1 receptor (PTS1 receptor) (PTS1R) (PTS1-BP) (PXR1P) (Peroxin-5) (Peroxisomal C-terminal targeting signal import receptor) (Peroxisome receptor 1)	Pex5 Pxr1	3	3	5.6338	70.7	4
Q61151	Serine/threonine-protein phosphatase 2A 56 kDa regulatory subunit epsilon isoform (PP2A B subunit isoform B'-epsilon) (PP2A B subunit isoform B56-epsilon) (PP2A B subunit isoform PR61-epsilon) (PP2A B subunit isoform R5-epsilon)	Ppp2r5e Kiaa4006	3	3	7.49465	54.7	4
Q9CPR7	Suppressor of IKBKE 1 (Suppressor of IKK-epsilon)	Sike1	3	3	12.0773	23.5	3
O08692	Neutrophilic granule protein (NGP) (Cystatin-like protein) (Myeloid bactenecin protein) (Myeloid secondary granule protein)	Ngp	3	3	16.1677	19.3	3
P47199	Quinone oxidoreductase (EC 1.6.5.5) (NADPH:quinone reductase) (Zeta-crystallin)	Cryz	7	7	21.148	35.2	11
D3YZP9	Coiled-coil domain-containing protein 6	Ccdc6	4	4	8.10235	52.9	5
Q8VE47	Ubiquitin-like modifier-activating enzyme 5 (Ubiquitin-activating enzyme 5) (UFM1-activating enzyme) (Ubiquitin-activating enzyme E1 domain-containing protein 1)	Uba5 Ube1dc1	4	4	11.1663	44.8	6
B1AUX2	Host cell factor 1	Hcfc1	3	3	1.29187	214.9	3
P35456	Urokinase plasminogen activator surface receptor (U-PAR) (uPAR) (CD antigen CD87)	Plaur	5	5	14.0673	35.4	5
A0A087WNZ5	Lymphocyte antigen 6C1	Ly6c1	2	2	25.1701	16	4
Q99L04	Dehydrogenase/reductase SDR family member 1 (EC 1.1.-.-)	Dhrs1 D14ertd484e	9	9	24.9201	34	15
E9PV41	Protein diaphanous homolog 1	Diaph1	12	12	8.93987	140.3	15
P30416	Peptidyl-prolyl cis-trans isomerase FKBP4 (PPIase FKBP4) (EC 5.2.1.8) (52 kDa FK506-binding protein) (52 kDa FKBP) (FKBP-52) (59 kDa immunophilin) (p59) (FK506-binding protein 4) (FKBP-4) (FKBP59) (HSP-binding immunophilin) (HBI) (Immunophilin FKBP52) (Rotamase) [Cleaved into: Peptidyl-prolyl cis-trans isomerase FKBP4, N-terminally processed]	Fkbp4 Fkpb52	10	10	21.179	51.5	23
Q78JE5	F-box only protein 22	Fbxo22 Fbx22	3	3	6.71642	44.2	3
F7DEU6	Inosine-5'-monophosphate dehydrogenase (IMP dehydrogenase) (IMPD) (IMPDH) (EC 1.1.1.205)	Impdh1 IMPDH	3	2	4.46097	57.7	3
G3X928	SEC23-interacting protein (Sec23 interacting protein, isoform CRA_c)	Sec23ip mCG_21024	10	9	8.41683	110.7	14
Q9Z2D6	Methyl-CpG-binding protein 2 (MeCp-2 protein) (MeCp2)	Mecp2	6	6	16.5289	52.3	7
Q9DBS5	Kinesin light chain 4 (KLC 4) (Kinesin-like protein 8)	Klc4 Knsl8	7	3	11.6317	68.6	8
Q8BIG7	Catechol O-methyltransferase domain-containing protein 1 (EC 2.1.1.-)	Comtd1	4	4	20.229	28.9	6
Q61133	Glutathione S-transferase theta-2 (EC 2.5.1.18) (GST class-theta-2)	Gstt2	4	3	19.6721	27.6	5
Q60772	Cyclin-dependent kinase 4 inhibitor C (Cyclin-dependent kinase 6 inhibitor) (p18-INK4c) (p18-INK6)	Cdkn2c	3	3	17.8571	18.1	3
Q8VIM9	Immunity-related GTPase family Q protein	Irgq Irgq1 Fksg27	4	4	9.09091	59.3	5
E9QMK9	D-glutamate cyclase, mitochondrial	Dglucy 9030617O03Rik	11	11	17.1561	69.9	16
Q9R0H0	Peroxisomal acyl-coenzyme A oxidase 1 (AOX) (EC 1.3.3.6) (Palmitoyl-CoA oxidase) [Cleaved into: Peroxisomal acyl-CoA oxidase 1, A chain; Peroxisomal acyl-CoA oxidase 1, B chain; Peroxisomal acyl-CoA oxidase 1, C chain]	Acox1 Acox Paox	13	13	24.2057	74.6	20
Q9DBL7	Bifunctional coenzyme A synthase (CoA synthase) [Includes: Phosphopantetheine adenylyltransferase (EC 2.7.7.3) (Dephospho-CoA pyrophosphorylase) (Pantetheine-phosphate adenylyltransferase) (PPAT); Dephospho-CoA kinase (DPCK) (EC 2.7.1.24) (Dephosphocoenzyme A kinase) (DPCOAK)]	Coasy Ukr1	5	5	10.1243	62	6
P19788	Matrix Gla protein (MGP)	Mgp Mglap	2	2	23.0769	12.4	3
P49813	Tropomodulin-1 (Erythrocyte tropomodulin) (E-Tmod)	Tmod1 Tmod	3	3	11.9777	40.4	3
E9Q9H0	Disks large homolog 1	Dlg1	8	8	8.44298	100.8	9
Q504M2	MCG53395 (Pyruvate dehyrogenase phosphatase catalytic subunit 2)	Pdp2 4833426J09Rik mCG_53395	4	4	8.08271	59.9	5
Q8BML1	[F-actin]-monooxygenase MICAL2 (EC 1.14.13.225) (Molecule interacting with CasL protein 2) (MICAL-2) (mMical2)	Mical2 Kiaa0750	7	7	7.29167	110	7
Q921F4	Heterogeneous nuclear ribonucleoprotein L-like	Hnrnpll Hnrpll	3	3	7.61421	64.1	4
P47754	F-actin-capping protein subunit alpha-2 (CapZ alpha-2)	Capza2 Cappa2	7	5	33.5664	32.9	18
Q99LY9	NADH dehydrogenase [ubiquinone] iron-sulfur protein 5 (Complex I-15 kDa) (CI-15 kDa) (NADH-ubiquinone oxidoreductase 15 kDa subunit)	Ndufs5	3	3	23.5849	12.6	7
Q924T7	E3 ubiquitin-protein ligase RNF31 (EC 2.3.2.31) (HOIL-1-interacting protein) (HOIP) (Putative Ariadne-like ubiquitin ligase) (PAUL) (RING finger protein 31) (RING-type E3 ubiquitin transferase RNF31)	Rnf31 Paul	6	6	7.03565	119.2	6
G5E911	DNA segment, Chr 6, Wayne State University 176, expressed, isoform CRA_f (Protein FAM3C)	Fam3c D6Wsu176e mCG_9383	4	4	17.8138	27	4
P48722	Heat shock 70 kDa protein 4L (Heat shock 70-related protein APG-1) (Osmotic stress protein 94)	Hspa4l Apg1 Hsp4l Osp94	17	15	22.7924	94.3	24
Q8BTZ7	Mannose-1-phosphate guanyltransferase beta (EC 2.7.7.13) (GDP-mannose pyrophosphorylase B) (GTP-mannose-1-phosphate guanylyltransferase beta)	Gmppb	3	3	11.1111	39.9	5
Q8BYA0	Tubulin-specific chaperone D (Beta-tubulin cofactor D) (Tubulin-folding cofactor D)	Tbcd	8	8	6.9398	133.2	10
Q05D44	Eukaryotic translation initiation factor 5B (eIF-5B) (EC 3.6.5.3) (Translation initiation factor IF-2)	Eif5b If2	6	6	4.35855	137.5	8
Q9JKY7	Cytochrome P450 CYP2D22 (Cytochrome P450, family 2, subfamily d, polypeptide 22) (MCG20388, isoform CRA_b)	Cyp2d22 mCG_20388	3	3	7	56.4	5
B1ATI0	Aldehyde dehydrogenase	Aldh3a2	9	8	19.5489	59.2	13
Q9D071	MMS19 nucleotide excision repair protein homolog (MET18 homolog) (MMS19-like protein)	Mms19 Mms19l	3	3	2.8128	113	3
P25799	Nuclear factor NF-kappa-B p105 subunit (DNA-binding factor KBF1) (EBP-1) (NF-kappa-B1 p84/NF-kappa-B1 p98) (Nuclear factor of kappa light polypeptide gene enhancer in B-cells 1) [Cleaved into: Nuclear factor NF-kappa-B p50 subunit]	Nfkb1	6	6	8.03296	105.5	8
Q9D892	Inosine triphosphate pyrophosphatase (ITPase) (Inosine triphosphatase) (EC 3.6.1.9) (Non-canonical purine NTP pyrophosphatase) (Non-standard purine NTP pyrophosphatase) (Nucleoside-triphosphate diphosphatase) (Nucleoside-triphosphate pyrophosphatase) (NTPase)	Itpa	1	1	5.55556	21.9	3
Q8R1I1	Cytochrome b-c1 complex subunit 9 (Complex III subunit 9) (Complex III subunit X) (Cytochrome c1 non-heme 7 kDa protein) (Ubiquinol-cytochrome c reductase complex 7.2 kDa protein)	Uqcr10	2	2	37.5	7.4	3
E9Q496	Vesicle transport protein USE1	Use1	4	4	11.9718	32.2	4
Q6P549	Phosphatidylinositol 3,4,5-trisphosphate 5-phosphatase 2 (EC 3.1.3.86) (AblSH3-binding protein) (Inositol polyphosphate phosphatase-like protein 1) (INPPL-1) (SH2 domain-containing inositol 5'-phosphatase 2) (SH2 domain-containing inositol phosphatase 2) (SHIP-2)	Inppl1 Ship2	3	2	1.90931	138.9	3
Q9EP69	Phosphatidylinositide phosphatase SAC1 (EC 3.1.3.-) (Suppressor of actin mutations 1-like protein)	Sacm1l Kiaa0851 Sac1	9	9	14.9915	66.9	14
O35607	Bone morphogenetic protein receptor type-2 (BMP type-2 receptor) (BMPR-2) (EC 2.7.11.30) (BRK-3) (Bone morphogenetic protein receptor type II) (BMP type II receptor) (BMPR-II)	Bmpr2	3	3	2.40848	114.9	3
Q9DAV6	R86 (Serine (Or cysteine) peptidase inhibitor, clade B, member 9B)	Serpinb9b mCG_17888	2	1	4.77454	42.7	3
O88851	Putative hydrolase RBBP9 (EC 3.-.-.-) (B5T-overexpressed gene protein) (Protein BOG) (Retinoblastoma-binding protein 9) (RBBP-9)	Rbbp9 Bog	4	4	29.0323	20.9	6
Q9JI46	Diphosphoinositol polyphosphate phosphohydrolase 1 (DIPP-1) (muDIPP1) (EC 3.6.1.52) (Diadenosine 5',5'''-P1,P6-hexaphosphate hydrolase 1) (EC 3.6.1.-) (Nucleoside diphosphate-linked moiety X motif 3) (Nudix motif 3)	Nudt3 Dipp Dipp1	4	3	23.8095	19	6
Q9CY16	28S ribosomal protein S28, mitochondrial (MRP-S28) (S28mt)	Mrps28	3	3	13.4409	20.5	3
Q8BVG4	Dipeptidyl peptidase 9 (DP9) (EC 3.4.14.5) (Dipeptidyl peptidase IX) (DPP IX) (Dipeptidyl peptidase-like protein 9) (DPLP9)	Dpp9	3	2	3.36427	97.9	3
Q8CGA0	Protein phosphatase 1F (EC 3.1.3.16) (Ca(2+)/calmodulin-dependent protein kinase phosphatase) (CaM-kinase phosphatase) (CaMKPase)	Ppm1f	4	4	12.1681	49.6	4
Q8CJ40	Rootletin (Ciliary rootlet coiled-coil protein)	Crocc Kiaa0445	7	6	3.08611	226.8	8
B8JK39	Integrin alpha-9	Itga9	11	11	10.6178	114.3	14
Q9JLN9	Serine/threonine-protein kinase mTOR (EC 2.7.11.1) (FK506-binding protein 12-rapamycin complex-associated protein 1) (FKBP12-rapamycin complex-associated protein) (Mammalian target of rapamycin) (mTOR) (Mechanistic target of rapamycin) (Rapamycin target protein 1) (RAPT1)	Mtor Frap Frap1	8	8	3.09925	288.6	9
A2AW86	Lymphocyte antigen 75	Ly75	3	3	1.27684	197.3	3
Q9Z0X4	cGMP-inhibited 3',5'-cyclic phosphodiesterase A (EC 3.1.4.17) (Cyclic GMP-inhibited phosphodiesterase A) (CGI-PDE A)	Pde3a	7	6	6.57318	124.4	9
G3UZ34	116 kDa U5 small nuclear ribonucleoprotein component	Eftud2	16	14	17.8794	108.3	25
P97821	Dipeptidyl peptidase 1 (EC 3.4.14.1) (Cathepsin C) (Cathepsin J) (Dipeptidyl peptidase I) (DPP-I) (DPPI) (Dipeptidyl transferase) [Cleaved into: Dipeptidyl peptidase 1 exclusion domain chain (Dipeptidyl peptidase I exclusion domain chain); Dipeptidyl peptidase 1 heavy chain (Dipeptidyl peptidase I heavy chain); Dipeptidyl peptidase 1 light chain (Dipeptidyl peptidase I light chain)]	Ctsc	3	3	6.49351	52.3	6
Q8C7X2	ER membrane protein complex subunit 1	Emc1 Kiaa0090	6	6	7.92377	111.5	7
Q8VBV7	COP9 signalosome complex subunit 8 (SGN8) (Signalosome subunit 8) (COP9 homolog) (JAB1-containing signalosome subunit 8)	Cops8 Csn8	5	5	34.9282	23.2	10
Q8BI84	Transport and Golgi organization protein 1 homolog (TANGO1) (Melanoma inhibitory activity protein 3)	Mia3 Kiaa0268 Tango	12	6	5.69948	213.5	14
P59017	Bcl-2-like protein 13 (Bcl2-L-13) (Bcl-rambo) (Protein Mil1)	Bcl2l13 Mil1	5	5	12.4424	46.7	9
Q9CXI0	2-methoxy-6-polyprenyl-1,4-benzoquinol methylase, mitochondrial (EC 2.1.1.201) (Ubiquinone biosynthesis methyltransferase COQ5)	Coq5 D5Ertd33e	7	7	27.2171	37.3	9
Q9D0A3	Arpin (Arp2/3 inhibition protein)	Arpin	3	3	12.3894	25.2	6
Q9EPK2	Protein XRP2	Rp2 Rp2h	2	2	4.89914	39.4	3
Q9D281	Protein Noxp20 (Nervous system overexpressed protein 20) (Protein FAM114A1)	Fam114a1 Noxp20	5	5	9.49033	61	5
P58871	182 kDa tankyrase-1-binding protein	Tnks1bp1 Kiaa1741 Tab182	11	11	7.73256	181.7	13
A0A286YCG8	Translocon-associated protein subunit alpha	Ssr1	2	2	8.1761	35.5	6
F8VQC7	Kinectin	Ktn1	17	17	11.9066	152.4	20
Q6XPS7	L-threonine aldolase (Threonine aldolase 1)	Tha1 Gly1	5	5	13.25	43.5	6
Q505D7	Optic atrophy 3 protein homolog	Opa3	2	2	10.0559	20.1	3
Q3UIK0	Myosin-binding protein C, cardiac-type	Mybpc3	11	11	9.15493	141.3	12
Q9CRA5	Golgi phosphoprotein 3 (Coat protein GPP34)	Golph3 Gpp34	4	4	13.7584	33.7	4
O35683	NADH dehydrogenase [ubiquinone] 1 alpha subcomplex subunit 1 (Complex I-MWFE) (CI-MWFE) (NADH-ubiquinone oxidoreductase MWFE subunit)	Ndufa1	2	2	24.2857	8.1	6
P99026	Proteasome subunit beta type-4 (EC 3.4.25.1) (Low molecular mass protein 3) (Macropain beta chain) (Multicatalytic endopeptidase complex beta chain) (Proteasome beta chain) (Proteasome chain 3)	Psmb4 Lmp3	4	4	20.0758	29.1	8
Q8CFR5	Dystrobrevin	Dtna	15	15	21.261	76.9	24
Q58A65	C-Jun-amino-terminal kinase-interacting protein 4 (JIP-4) (JNK-interacting protein 4) (JNK-associated leucine-zipper protein) (JLP) (JNK/SAPK-associated protein 2) (JSAP2) (Mitogen-activated protein kinase 8-interacting protein 4) (Sperm-associated antigen 9)	Spag9 Jip4 Jsap2 Kiaa0516 Mapk8ip4	8	8	6.28312	146.1	11
Q8C7E4	Ribonuclease 4 (Ribonuclease A b1) (Ribonuclease, RNase A family 4)	Rnase4 Rab1	5	5	42.5676	17	8
O89103	Complement component C1q receptor (C1q/MBL/SPA receptor) (C1qR(p)) (C1qRp) (Cell surface antigen AA4) (Complement component 1 q subcomponent receptor 1) (Lymphocyte antigen 68) (Ly-68) (CD antigen CD93)	Cd93 Aa4 C1qr1 C1qrp Ly68	1	1	1.70807	69.3	2
Q921F2	TAR DNA-binding protein 43 (TDP-43)	Tardbp Tdp43	9	9	20.7729	44.5	16
P55096	ATP-binding cassette sub-family D member 3 (68 kDa peroxisomal membrane protein) (PMP68) (70 kDa peroxisomal membrane protein) (PMP70)	Abcd3 Pmp70 Pxmp1	7	7	9.1047	75.4	8
Q9Z1Q2	Phosphatidylserine lipase ABHD16A (EC 3.1.-.-) (Alpha/beta hydrolase domain-containing protein 16A) (Abhydrolase domain-containing protein 16A) (HLA-B-associated transcript 5) (mBAT5) (Monoacylglycerol lipase ABHD16A) (EC 3.1.1.23)	Abhd16a Bat5 Ng26	8	8	14.6953	63	10
P68134	Actin, alpha skeletal muscle (Alpha-actin-1) [Cleaved into: Actin, alpha skeletal muscle, intermediate form]	Acta1 Acta	26	2	69.496	42	325
E9PUU4	Gem-associated protein 5	Gemin5	3	3	1.86294	166.6	4
P60122	RuvB-like 1 (EC 3.6.4.12) (49 kDa TATA box-binding protein-interacting protein) (49 kDa TBP-interacting protein) (DNA helicase p50) (Pontin 52) (TIP49a)	Ruvbl1 Tip49 Tip49a	8	8	21.2719	50.2	13
A0A087WQT6	Caspase-8	Casp8	3	3	6.8	57.8	3
Q6PGF7	Exocyst complex component 8 (Exocyst complex 84 kDa subunit)	Exoc8	10	10	13.1285	81	12
Q8VHC3	Selenoprotein M (SelM)	Selenom	3	3	24.1379	16.4	3
Q9D6F9	Tubulin beta-4A chain (Tubulin beta-4 chain)	Tubb4a Tubb4	18	4	50.4505	49.6	133
Q8K2B0	Endoplasmic reticulum protein SC65 (Leprecan-like protein 4) (Prolyl 3-hydroxylase family member 4) (Synaptonemal complex protein SC65)	P3h4 Leprel4 Sc65	4	4	9.48081	51.1	6
F8VQC1	Signal recognition particle subunit SRP72	Srp72	6	6	8.34575	74.6	6
P49222	Erythrocyte membrane protein band 4.2 (Erythrocyte protein 4.2) (P4.2)	Epb42 Epb4.2	3	2	3.47323	76.7	4
A0A140LIU4	Cytochrome c oxidase subunit 7A1, mitochondrial (Cytochrome c oxidase, subunit VIIa 1, isoform CRA_a)	Cox7a1 mCG_21566	3	3	32.5843	9.8	11
E9Q512	Thyroid hormone receptor interactor 11	Trip11	7	6	3.64372	226.3	7
Q91XL1	Leucine-rich HEV glycoprotein (Leucine-rich alpha-2-glycoprotein) (Leucine-rich alpha-2-glycoprotein 1)	Lrg1 Lrg lrhg mCG_22979	6	6	19.2982	37.4	12
Q8BXV2	BRI3-binding protein (I3-binding protein)	Bri3bp	2	2	10.2767	28.2	2
Q91VM9	Inorganic pyrophosphatase 2, mitochondrial (EC 3.6.1.1) (Pyrophosphate phospho-hydrolase 2) (PPase 2)	Ppa2	7	7	22.1212	38.1	9
A0A0R4J1E4	SPARC-related modular calcium-binding protein 1	Smoc1	13	13	26.9978	51.1	24
Q8BP92	Reticulocalbin-2 (Taipoxin-associated calcium-binding protein 49) (TCBP-49)	Rcn2	12	11	44.6875	37.2	19
O09111	NADH dehydrogenase [ubiquinone] 1 beta subcomplex subunit 11, mitochondrial (Complex I-ESSS) (CI-ESSS) (NADH-ubiquinone oxidoreductase ESSS subunit) (Neuronal protein 15.6) (Np15.6) (p15.6)	Ndufb11 Np15	3	3	32.4503	17.4	5
Q6PB93	Polypeptide N-acetylgalactosaminyltransferase 2 (EC 2.4.1.41) (Polypeptide GalNAc transferase 2) (GalNAc-T2) (pp-GaNTase 2) (Protein-UDP acetylgalactosaminyltransferase 2) (UDP-GalNAc:polypeptide N-acetylgalactosaminyltransferase 2) [Cleaved into: Polypeptide N-acetylgalactosaminyltransferase 2 soluble form]	Galnt2	8	7	13.8596	64.5	12
A0A0R4J0I6	Acyl-CoA dehydrogenase family member 11	Acad11	12	11	12.9653	87.3	13
Q64514	Tripeptidyl-peptidase 2 (TPP-2) (EC 3.4.14.10) (Tripeptidyl aminopeptidase) (Tripeptidyl-peptidase II) (TPP-II)	Tpp2	12	12	9.03328	139.8	13
Q3TVI8	Pre-B-cell leukemia transcription factor-interacting protein 1 (Hematopoietic PBX-interacting protein)	Pbxip1 Hpip	12	12	19.6699	81.1	17
Q8BHC9	Alpha-(1,3)-fucosyltransferase 11 (EC 2.4.1.-) (Fucosyltransferase XI) (Fuc-TXI) (FucT-XI) (Galactoside 3-L-fucosyltransferase 11) (Fucosyltransferase 11)	Fut11	5	5	12.0654	55.5	5
E9PYT0	Rho GTPase-activating protein 5	Arhgap5	4	3	1.86294	172.4	4
Q9D0Q7	39S ribosomal protein L45, mitochondrial (L45mt) (MRP-L45)	Mrpl45	4	4	13.3987	35.4	4
Q9CQV1	Mitochondrial import inner membrane translocase subunit TIM16 (Mitochondria-associated granulocyte macrophage CSF-signaling molecule) (Presequence translocated-associated motor subunit PAM16)	Pam16 Magmas Tim16 Timm16	3	3	23.2	13.8	6
G3X9C8	LIX1-like protein (MCG14859)	Lix1l mCG_14859	3	3	7.4184	36.6	3
Q8VHL1	Histone-lysine N-methyltransferase SETD7 (EC 2.1.1.43) (Histone H3-K4 methyltransferase SETD7) (H3-K4-HMTase SETD7) (SET domain-containing protein 7) (SET7/9)	Setd7 Kiaa1717 Set7 Set9	3	3	9.83607	40.5	4
Q9DB15	39S ribosomal protein L12, mitochondrial (L12mt) (MRP-L12)	Mrpl12 Rpml12	4	4	20.398	21.7	6
Q8K182	Complement component C8 alpha chain (Complement component 8 subunit alpha)	C8a	9	9	14.9915	66	12
Q921H8	3-ketoacyl-CoA thiolase A, peroxisomal (EC 2.3.1.16) (Acetyl-CoA acyltransferase A) (Beta-ketothiolase A) (Peroxisomal 3-oxoacyl-CoA thiolase A)	Acaa1a Acaa1	12	12	38.6792	43.9	18
Q00262	Syntaxin-2 (Epimorphin)	Stx2 Epim	3	3	8.65052	33.2	3
Q925N0	Sideroflexin-5	Sfxn5	5	5	12.8655	37.3	7
E9Q450	Tropomyosin alpha-1 chain	Tpm1	30	1	70.0704	32.8	252
P50516	V-type proton ATPase catalytic subunit A (V-ATPase subunit A) (EC 7.1.2.2) (V-ATPase 69 kDa subunit) (Vacuolar proton pump subunit alpha)	Atp6v1a Atp6a1 Atp6a2 Atp6v1a1	18	18	32.7391	68.3	29
Q9ERF3	WD repeat-containing protein 61 (Meiotic recombination REC14 protein homolog) [Cleaved into: WD repeat-containing protein 61, N-terminally processed]	Wdr61	4	4	14.0984	33.8	4
Q5SUR0	Phosphoribosylformylglycinamidine synthase (FGAM synthase) (FGAMS) (EC 6.3.5.3) (Formylglycinamide ribonucleotide amidotransferase) (FGAR amidotransferase) (FGAR-AT) (Formylglycinamide ribotide amidotransferase)	Pfas Kiaa0361	10	10	8.30217	144.5	12
O35405	Phospholipase D3 (PLD 3) (EC 3.1.4.4) (Choline phosphatase 3) (Phosphatidylcholine-hydrolyzing phospholipase D3) (Schwannoma-associated protein 9) (SAM-9)	Pld3 Sam9	4	4	8.60656	54.4	4
A0A0R4J225	Bernardinelli-Seip congenital lipodystrophy 2 homolog (Human), isoform CRA_a (Seipin)	Bscl2 mCG_17850	1	1	2.0316	49.6	2
Q3UQN2	F-BAR domain only protein 2	Fcho2	5	5	4.69716	88.7	5
P70333	Heterogeneous nuclear ribonucleoprotein H2 (hnRNP H2) (Heterogeneous nuclear ribonucleoprotein H') (hnRNP H') [Cleaved into: Heterogeneous nuclear ribonucleoprotein H2, N-terminally processed]	Hnrnph2 Hnrph2	10	2	26.9488	49.2	23
Q61635	GTP-binding protein (Interferon gamma inducible protein 47, isoform CRA_a) (Interferon gamma-inducible protein 47) (Interferon-gamma-inducible GTPase Ifggc1 protein)	Ifi47 Ifggc1 IRG-47 mCG_14415	3	2	6.19048	46.8	3
Q3THK7	GMP synthase [glutamine-hydrolyzing] (EC 6.3.5.2) (GMP synthetase) (Glutamine amidotransferase)	Gmps	9	9	18.0375	76.7	14
Q61334	B-cell receptor-associated protein 29 (BCR-associated protein 29) (Bap29)	Bcap29 Bap29	2	2	6.66667	27.9	3
P33587	Vitamin K-dependent protein C (EC 3.4.21.69) (Anticoagulant protein C) (Autoprothrombin IIA) (Blood coagulation factor XIV) [Cleaved into: Vitamin K-dependent protein C light chain; Vitamin K-dependent protein C heavy chain; Activation peptide]	Proc	4	4	9.13043	51.8	5
Q9CWS0	N(G),N(G)-dimethylarginine dimethylaminohydrolase 1 (DDAH-1) (Dimethylarginine dimethylaminohydrolase 1) (EC 3.5.3.18) (DDAHI) (Dimethylargininase-1)	Ddah1	5	4	11.9298	31.4	8
Q9ESE1	Lipopolysaccharide-responsive and beige-like anchor protein (Beige-like protein)	Lrba Bgl Lba	3	2	1.05042	316.9	4
S4R1M2	Scaffold attachment factor B1	Safb	9	9	8.09372	105.3	13
Q8K2B3	Succinate dehydrogenase [ubiquinone] flavoprotein subunit, mitochondrial (EC 1.3.5.1) (Flavoprotein subunit of complex II) (Fp)	Sdha	22	22	37.3494	72.5	76
Q62234	Myomesin-1 (Myomesin family member 1) (Skelemin)	Myom1	9	9	5.75885	185.3	10
Q9D4H1	Exocyst complex component 2 (Exocyst complex component Sec5)	Exoc2 Sec5 Sec5l1	5	5	4.97835	103.9	5
P27641	X-ray repair cross-complementing protein 5 (EC 3.6.4.-) (ATP-dependent DNA helicase 2 subunit 2) (ATP-dependent DNA helicase II 80 kDa subunit) (CTC box-binding factor 85 kDa subunit) (CTC85) (CTCBF) (DNA repair protein XRCC5) (Ku autoantigen protein p86 homolog) (Ku80) (Nuclear factor IV)	Xrcc5 G22p2	2	2	2.3224	83	3
Q9CQI3	Glia maturation factor beta (GMF-beta)	Gmfb	3	2	19.0141	16.7	5
Q61127	NGFI-A-binding protein 2 (EGR-1-binding protein 2)	Nab2	3	3	4.7619	56.5	3
Q6P4T2	U5 small nuclear ribonucleoprotein 200 kDa helicase (EC 3.6.4.13) (BRR2 homolog) (U5 snRNP-specific 200 kDa protein) (U5-200KD)	Snrnp200 Kiaa0788	19	19	10.0655	244.4	21
Q61033	Lamina-associated polypeptide 2, isoforms alpha/zeta (Thymopoietin isoforms alpha/zeta) (TP alpha/zeta)	Tmpo Lap2	10	5	19.4805	75.1	16
A0A0R4J104	Disabled homolog 2 (Disabled homolog 2 (Drosophila))	Dab2 mCG_5086	2	1	2.34987	82.2	3
P59016	Vacuolar protein sorting-associated protein 33B	Vps33b	6	6	9.72447	70.5	6
P56695	Wolframin	Wfs1	3	3	3.37079	100.5	6
Q9EP89	Serine beta-lactamase-like protein LACTB, mitochondrial (EC 3.4.-.-)	Lactb Lact1	1	1	2.17786	60.7	1
Q8K1R3	Polyribonucleotide nucleotidyltransferase 1, mitochondrial (EC 2.7.7.8) (3'-5' RNA exonuclease OLD35) (PNPase old-35) (Polynucleotide phosphorylase 1) (PNPase 1) (Polynucleotide phosphorylase-like protein)	Pnpt1 Pnpase	7	7	7.15198	85.6	7
Q9CQC8	Maspardin (Acid cluster protein 33) (Spastic paraplegia 21 autosomal recessive Mast syndrome protein homolog)	Spg21	1	1	3.8961	34.9	2
Q8K354	Carbonyl reductase [NADPH] 3 (EC 1.1.1.184) (NADPH-dependent carbonyl reductase 3)	Cbr3	8	7	38.6282	30.9	13
Q9D8S9	BolA-like protein 1	Bola1	2	2	18.2482	14.4	4
A0A0R4J097	Transforming growth factor beta receptor type 3 (Transforming growth factor, beta receptor III)	Tgfbr3 mCG_19131	2	2	2.11765	93.7	2
Q8BUR4	Dedicator of cytokinesis protein 1 (180 kDa protein downstream of CRK) (DOCK180)	Dock1	5	4	2.46649	214.9	5
Q9D2V7	Coronin-7 (Crn7) (70 kDa WD repeat tumor rejection antigen homolog)	Coro7	6	6	6.39913	100.7	7
Q921C5	Protein bicaudal D homolog 2 (Bic-D 2)	Bicd2 Kiaa0699	8	8	8.90244	93.3	8
E9QNY3	Myosin regulatory light chain 10	Myl10	3	1	19.0476	16.9	5
Q9D287	Pre-mRNA-splicing factor SPF27 (Breast carcinoma-amplified sequence 2 homolog) (DNA amplified in mammary carcinoma 1 protein)	Bcas2 Dam1	3	3	12.4444	26.1	3
Q9WV98	Mitochondrial import inner membrane translocase subunit Tim9	Timm9 Tim9 Tim9a Timm9a	2	2	17.9775	10.3	5
A3KG59	Peptidase M20 domain-containing protein 2 (Aminoacylase-1-like protein 2)	Pm20d2 Acy1l2 Gm424	2	2	3.24826	46.5	3
Q9CQB4	Cytochrome b-c1 complex subunit 7	Uqcrb mCG_67985	10	10	59.4595	13.6	40
Q3UDM0	MOB kinase activator 1B	Mob1b Mobkl1a	2	2	10.4072	25.6	3
P97765	WW domain-binding protein 2 (WBP-2)	Wbp2	2	2	7.27969	28	2
Q9CPU2	NADH dehydrogenase [ubiquinone] 1 beta subcomplex subunit 2, mitochondrial (Complex I-AGGG) (CI-AGGG) (NADH-ubiquinone oxidoreductase AGGG subunit)	Ndufb2	2	2	8.57143	12	7
Q5SUF2	Luc7-like protein 3 (Cisplatin resistance-associated-overexpressed protein)	Luc7l3 Crop	3	3	6.01852	51.4	4
A0A1B0GRA5	Stromal interaction molecule 1	Stim1	7	7	8.95334	88.9	8
P55302	Alpha-2-macroglobulin receptor-associated protein (Alpha-2-MRAP) (Heparin-binding protein 44) (HBP-44) (Low density lipoprotein receptor-related protein-associated protein 1) (RAP)	Lrpap1	9	9	21.1111	42.2	12
Q91XF0	Pyridoxine-5'-phosphate oxidase (EC 1.4.3.5) (Pyridoxamine-phosphate oxidase)	Pnpo	4	4	16.8582	30.1	4
Q8C7H1	Methylmalonic aciduria type A homolog, mitochondrial (EC 3.6.-.-)	Mmaa	3	3	8.43373	45.9	3
P47811	Mitogen-activated protein kinase 14 (MAP kinase 14) (MAPK 14) (EC 2.7.11.24) (CRK1) (Mitogen-activated protein kinase p38 alpha) (MAP kinase p38 alpha)	Mapk14 Crk1 Csbp1 Csbp2	7	6	20.5556	41.3	10
Q6PAR5	GTPase-activating protein and VPS9 domain-containing protein 1 (GAPex-5) (Rab5-activating protein 6)	Gapvd1 Gapex5 Kiaa1521	2	2	1.50892	162.3	3
Q9CQA1	Trafficking protein particle complex subunit 5	Trappc5	2	2	9.04255	20.8	3
P31725	Protein S100-A9 (Calgranulin-B) (Leukocyte L1 complex heavy chain) (Migration inhibitory factor-related protein 14) (MRP-14) (p14) (S100 calcium-binding protein A9)	S100a9 Cagb Mrp14	4	4	35.3982	13	6
Q9JJZ2	Tubulin alpha-8 chain (Alpha-tubulin 8)	Tuba8	14	2	35.1893	50	99
O35857	Mitochondrial import inner membrane translocase subunit TIM44	Timm44 Mimt44 Tim44	13	13	29.8673	51.1	20
O88545	COP9 signalosome complex subunit 6 (SGN6) (Signalosome subunit 6) (JAB1-containing signalosome subunit 6)	Cops6 Csn6	4	4	13.2716	35.9	5
Q9ERR1	Nuclear distribution protein nudE-like 1 (Protein mNudE-like) (Protein Nudel) (mNudE-L)	Ndel1 Nudel	2	2	5.7971	38.3	3
P35279	Ras-related protein Rab-6A (Rab-6)	Rab6a Rab6 MNCb-1660	7	4	36.0577	23.6	15
Q9WUL7	ADP-ribosylation factor-like protein 3	Arl3	5	5	29.1209	20.5	7
E9Q6I2	Interleukin-1 receptor accessory protein	Il1rap	5	5	7.5	73.5	6
P63325	40S ribosomal protein S10	Rps10	7	7	43.6364	18.9	19
Q9CQF9	Prenylcysteine oxidase (EC 1.8.3.5)	Pcyox1 Kiaa0908	4	4	7.32673	56.5	4
Q8CI75	DIS3-like exonuclease 2 (EC 3.1.13.-)	Dis3l2	2	2	1.95402	97.7	2
E9Q634	Unconventional myosin-Ie (Unconventional myosin 1E)	Myo1e Myr3	2	2	2.07769	126.7	3
Q9D1N2	Glycosylphosphatidylinositol-anchored high density lipoprotein-binding protein 1 (GPI-HBP1) (GPI-anchored HDL-binding protein 1) (High density lipoprotein-binding protein 1)	Gpihbp1 Hbp1	2	2	7.01754	24.6	3
Q8K299	Scavenger receptor class A member 5	Scara5	11	11	19.5519	53.6	14
Q02013	Aquaporin-1 (AQP-1) (Aquaporin-CHIP) (Delayed early response protein 2) (DER2) (Water channel protein for red blood cells and kidney proximal tubule)	Aqp1	4	4	17.1004	28.8	11
O35551	Rab GTPase-binding effector protein 1 (Rabaptin-5) (Rabaptin-5alpha)	Rabep1 Rab5ep Rabpt5 Rabpt5a	9	9	10.9049	99.5	9
Q922E4	Ethanolamine-phosphate cytidylyltransferase (EC 2.7.7.14) (CTP:phosphoethanolamine cytidylyltransferase) (Phosphorylethanolamine transferase)	Pcyt2	2	2	5.44554	45.2	3
A2AKW0	Solute carrier family 25 member 51	Slc25a51 Mcart1	2	2	5.07937	35.5	2
E9Q043	Fibronectin type III domain-containing 1	Fndc1	4	4	3.29099	189	4
Q8R2Y8	Peptidyl-tRNA hydrolase 2, mitochondrial (PTH 2) (EC 3.1.1.29)	Ptrh2 Pth2	2	2	12.7072	19.5	3
Q9QZ06	Toll-interacting protein	Tollip	6	6	22.9927	30.3	7
Q8R143	Pituitary tumor-transforming gene 1 protein-interacting protein (Pituitary tumor-transforming gene protein-binding factor) (PBF) (PTTG-binding factor)	Pttg1ip	2	2	8.62069	20	3
Q8VEC4	Calcium homeostasis modulator protein 2 (Protein FAM26B)	Calhm2 Fam26b	2	2	5.57276	35.8	2
Q9D4J1	EF-hand domain-containing protein D1 (EF-hand domain-containing protein 1) (Mitocalcin) (Swiprosin-2)	Efhd1 Sws2	5	3	26.25	27	8
Q9ERG2	Striatin-3 (Cell cycle autoantigen SG2NA) (S/G2 antigen)	Strn3 Gs2na Sg2na	10	9	11.6834	87.1	14
O70571	[Pyruvate dehydrogenase (acetyl-transferring)] kinase isozyme 4, mitochondrial (EC 2.7.11.2) (Pyruvate dehydrogenase kinase isoform 4)	Pdk4	9	8	22.3301	46.6	11
A0A0N4SV63	Dysferlin	Dysf	27	23	12.217	241	33
B1AZ14	Cordon-bleu protein-like 1	Cobll1	4	4	3.22321	133.3	4
Q9D1H8	39S ribosomal protein L53, mitochondrial (L53mt) (MRP-L53)	Mrpl53	2	2	17.7966	12.7	2
Q63ZW6	Col4a5 protein (Collagen, type IV, alpha 5)	Col4a5	4	1	2.48374	161.7	11
Q9JJK2	LanC-like protein 2 (Testis-specific adriamycin sensitivity protein)	Lancl2 Tasp	5	5	11.7778	50.7	5
P35123	Ubiquitin carboxyl-terminal hydrolase 4 (EC 3.4.19.12) (Deubiquitinating enzyme 4) (Ubiquitin thioesterase 4) (Ubiquitin-specific-processing protease 4) (Ubiquitous nuclear protein)	Usp4 Unp	7	7	6.75676	108.3	10
P21460	Cystatin-C (Cystatin-3)	Cst3	4	4	26.4286	15.5	6
Q3TQC7	Ectonucleoside triphosphate diphosphohydrolase 5	Entpd5	6	6	13.0531	49.8	7
Q9CR00	26S proteasome non-ATPase regulatory subunit 9 (26S proteasome regulatory subunit p27)	Psmd9	7	7	37.8378	24.7	11
F6ZGI7	Molybdopterin synthase sulfur carrier subunit (Molybdenum cofactor synthesis protein 2 small subunit) (Molybdenum cofactor synthesis protein 2A) (MOCS2A) (Sulfur carrier protein MOCS2A)	Mocs2 MOCS2	1	1	12.5	9.7	2
Q8VCA8	Secernin-2	Scrn2	6	6	17.6471	46.6	8
E9PYH2	Cytosolic acyl coenzyme A thioester hydrolase	Acot7	7	7	19.5312	42.8	9
Q6PGB6	N-alpha-acetyltransferase 50 (EC 2.3.1.258) (N-acetyltransferase NAT13) (N-epsilon-acetyltransferase 50) (EC 2.3.1.-) (NatE catalytic subunit)	Naa50 Mak3 Nat13	2	2	11.2426	19.4	3
Q8CI78	Required for meiotic nuclear division protein 1 homolog	Rmnd1	2	2	4.44444	51.8	2
Q99L20	Glutathione S-transferase theta-3 (EC 2.5.1.18)	Gstt3	6	5	25.7261	27.4	8
P61957	Small ubiquitin-related modifier 2 (SUMO-2) (SMT3 homolog 2) (Ubiquitin-like protein SMT3B) (Smt3B)	Sumo2 Smt3b Smt3h2	3	1	29.4737	10.9	3
P09242	Alkaline phosphatase, tissue-nonspecific isozyme (AP-TNAP) (TNSALP) (EC 3.1.3.1) (Alkaline phosphatase 2) (Alkaline phosphatase liver/bone/kidney isozyme)	Alpl Akp-2 Akp2	3	3	6.48855	57.5	4
Q62446	Peptidyl-prolyl cis-trans isomerase FKBP3 (PPIase FKBP3) (EC 5.2.1.8) (25 kDa FK506-binding protein) (25 kDa FKBP) (FKBP-25) (FK506-binding protein 3) (FKBP-3) (Immunophilin FKBP25) (Rapamycin-selective 25 kDa immunophilin) (Rotamase)	Fkbp3 Fkbp25	3	3	14.7321	25.1	3
A2A9Q2	Nardilysin, N-arginine dibasic convertase, NRD convertase 1	Nrd1	4	4	3.82425	140.5	4
Q9ER72	Cysteine--tRNA ligase, cytoplasmic (EC 6.1.1.16) (Cysteinyl-tRNA synthetase) (CysRS)	Cars	6	6	6.73887	94.8	7
Q99MR6	Serrate RNA effector molecule homolog (Arsenite-resistance protein 2)	Srrt Ars2 Asr2	14	14	14.0571	100.4	16
G5E8C4	MCG142017, isoform CRA_a (Protein O-mannosyl-transferase TMTC3)	Tmtc3 mCG_142017	5	1	3.58696	104.1	8
Q8BJ71	Nuclear pore complex protein Nup93 (93 kDa nucleoporin) (CBP-interacting protein 4) (Nucleoporin Nup93)	Nup93 Cip4 Kiaa0095	10	10	11.8437	93.2	12
Q9R1Z8	Vinexin (SH3 domain-containing protein SH3P3) (SH3-containing adapter molecule 1) (SCAM-1) (Sorbin and SH3 domain-containing protein 3)	Sorbs3 Scam1 Sh3d4	9	9	13.3697	82.3	12
Q8BGT6	MICAL-like protein 1 (Molecule interacting with Rab13) (MIRab13)	Micall1 D15Mit260 Kiaa1668 Mirab13	4	4	3.90805	94	4
Q99P31	Hsp70-binding protein 1 (HspBP1) (Heat shock protein-binding protein 1) (Hsp70-interacting protein 1)	Hspbp1 Hspbp	4	4	14.0056	39.1	4
Q99K48	Non-POU domain-containing octamer-binding protein (NonO protein)	Nono	12	10	24.5243	54.5	16
Q2VLH6	Scavenger receptor cysteine-rich type 1 protein M130 (CD antigen CD163) [Cleaved into: Soluble CD163 (sCD163)]	Cd163 M130	22	22	22.5691	120.8	29
Q8R2P8	Lysine--tRNA ligase (EC 6.1.1.6) (Lysyl-tRNA synthetase)	Kars mCG_141545	19	19	30.1282	71.2	30
P82347	Delta-sarcoglycan (Delta-SG) (35 kDa dystrophin-associated glycoprotein) (35DAG)	Sgcd	10	9	36.3322	32.1	18
P29788	Vitronectin (VN) (S-protein) (Serum-spreading factor)	Vtn	7	7	15.272	54.8	29
Q8CBY1	Protein Smaug homolog 1 (Smaug 1) (mSmaug 1) (Sterile alpha motif domain-containing protein 4A)	Samd4a Samd4 Smaug1	2	2	2.25035	78.3	2
O88441	Metaxin-2 (Mitochondrial outer membrane import complex protein 2)	Mtx2 MNCb-0780	6	6	23.5741	29.7	10
P83882	60S ribosomal protein L36a (60S ribosomal protein L44)	Rpl36a Rpl44	3	3	23.5849	12.4	5
Q922H2	[Pyruvate dehydrogenase (acetyl-transferring)] kinase isozyme 3, mitochondrial (EC 2.7.11.2) (Pyruvate dehydrogenase kinase isoform 3)	Pdk3	4	4	9.87952	47.9	4
O35643	AP-1 complex subunit beta-1 (Adaptor protein complex AP-1 subunit beta-1) (Adaptor-related protein complex 1 subunit beta-1) (Beta-1-adaptin) (Beta-adaptin 1) (Clathrin assembly protein complex 1 beta large chain) (Golgi adaptor HA1/AP1 adaptin beta subunit)	Ap1b1 Adtb1	20	4	20.9968	103.9	35
Q9R069	Basal cell adhesion molecule (B-CAM cell surface glycoprotein) (Lutheran antigen) (CD antigen CD239)	Bcam Gplu Lu	20	20	40.0322	67.6	60
F8VPM7	ELKS/Rab6-interacting/CAST family member 1	Erc1	12	12	9.64286	128.3	15
Q9JIG7	Coiled-coil domain-containing protein 22	Ccdc22 DXImx40e	10	10	18.0223	70.8	16
Q62264	Thyroid hormone-inducible hepatic protein (Spot 14 protein) (S14) (SPOT14)	Thrsp S14	5	5	43.3333	17.1	18
Q8CC88	von Willebrand factor A domain-containing protein 8	Vwa8 Kiaa0564	41	41	21.6273	213.3	60
Q3U1U4	Predicted gene, 49368	Gm49368	3	2	2.19156	135.9	3
G3X924	Plasmalemma vesicle-associated protein	Plvap mCG_10378	10	9	22.3744	49.9	11
Q05816	Fatty acid-binding protein 5 (Epidermal-type fatty acid-binding protein) (E-FABP) (Fatty acid-binding protein, epidermal) (Keratinocyte lipid-binding protein) (Psoriasis-associated fatty acid-binding protein homolog) (PA-FABP)	Fabp5 Fabpe Klbp Mal1	8	8	57.037	15.1	19
E9Q8B5	Predicted gene 4788	Gm4788	6	4	7.39477	99.4	9
D3YVW2	Golgi integral membrane protein 4	Golim4	9	9	14.0556	79.9	11
Q8BVQ9	26S proteasome regulatory subunit 7	Psmc2	15	15	36.2105	52.8	21
Q9DB27	Malignant T-cell-amplified sequence 1 (MCT-1) (Multiple copies T-cell malignancies 1)	Mcts1	2	2	9.39227	20.5	4
P97457	Myosin regulatory light chain 2, skeletal muscle isoform (Fast skeletal myosin light chain 2) (MLC2F)	Mylpf	9	9	48.5207	18.9	13
Q9CZU3	Exosome RNA helicase MTR4 (EC 3.6.4.13) (ATP-dependent helicase SKIV2L2) (Superkiller viralicidic activity 2-like 2) (TRAMP-like complex helicase)	Mtrex Skiv2l2	4	4	3.36538	117.6	4
Q64516	Glycerol kinase (GK) (Glycerokinase) (EC 2.7.1.30) (ATP:glycerol 3-phosphotransferase)	Gk Gyk	15	14	22.898	61.2	22
Q9WV96	Mitochondrial import inner membrane translocase subunit Tim10 B (Mitochondrial import inner membrane translocase subunit Tim9 B) (TIMM10B) (Tim10b)	Timm10b Fxc1 Tim9b Timm9b	3	3	35	11.3	3
Q61247	Alpha-2-antiplasmin (Alpha-2-AP) (Alpha-2-plasmin inhibitor) (Alpha-2-PI) (Serpin F2)	Serpinf2 Pli	8	8	16.4969	54.9	12
A2AHD1	Cellular communication network factor 5 (WNT1 inducible signaling pathway protein 2, isoform CRA_a)	Ccn5 Wisp2 mCG_5435	4	4	18.7251	27.1	9
Q61830	Macrophage mannose receptor 1 (MMR) (CD antigen CD206)	Mrc1	34	34	22.3214	164.9	47
Q8BWZ3	N-alpha-acetyltransferase 25, NatB auxiliary subunit (Mitochondrial distribution and morphology protein 20) (N-terminal acetyltransferase B complex subunit MDM20) (NatB complex subunit MDM20) (N-terminal acetyltransferase B complex subunit NAA25)	Naa25 Mdm20	2	2	1.95473	111.6	3
B1ARB3	Platelet endothelial cell adhesion molecule (Platelet/endothelial cell adhesion molecule 1, isoform CRA_d)	Pecam1 mCG_2881	13	13	20.2186	81.9	19
[truncated: 2,843 more rows]
