# Supplementary material for: Improvement of Endothelial Dysfunction of Berberine in Atherosclerotic Mice and Mechanism Exploring through TMT-Based Proteomics
Source: Oxid Med Cell Longev. 2020 May 31;2020:8683404. doi: 10.1155/2020/8683404 (PMC7284929; doi:10.1155/2020/8683404)
Supplement: Supplementary 2 — Supplementary Table 2: the data of GO enrichment analysis including cellular component, molecular function, and biological process. [file 8683404.f2.xlsx]

## Sheet: Cellular component
Supplementary Table 2. The data of GO enrichment analysis including cellular component, molecular function and biological process.
Category	Term ID	Term	Term num	Count	Gene Ratio	P Value	FDR
Cellular component	GO:0005739	mitochondrion	2431	73	0.0300288	4.4942e-35	8.6738e-33
Cellular component	GO:0070062	extracellular exosome	3085	68	0.0220421	1.6962e-24	1.63683e-22
Cellular component	GO:0005777	peroxisome	157	15	0.0955414	1.27568e-14	8.20686e-13
Cellular component	GO:0005743	mitochondrial inner membrane	478	22	0.0460251	3.314e-14	1.59901e-12
Cellular component	GO:0005778	peroxisomal membrane	62	7	0.112903	5.29098e-08	2.04232e-06
Cellular component	GO:0034364	high-density lipoprotein particle	23	5	0.217391	1.50342e-07	4.83601e-06
Cellular component	GO:0005741	mitochondrial outer membrane	180	9	0.05	7.7496e-07	2.13668e-05
Cellular component	GO:0005615	extracellular space	1973	29	0.0146984	1.3958e-06	3.36737e-05
Cellular component	GO:0072562	blood microparticle	262	10	0.0381679	2.18451e-06	4.68456e-05
Cellular component	GO:0005751	mitochondrial respiratory chain complex IV	19	4	0.210526	3.25807e-06	6.28807e-05
Cellular component	GO:0031966	mitochondrial membrane	118	7	0.059322	4.37421e-06	7.67475e-05
Cellular component	GO:0031012	extracellular matrix	350	11	0.0314286	4.39213e-06	7.06402e-05
Cellular component	GO:0034366	spherical high-density lipoprotein particle	8	3	0.375	9.06475e-06	0.000134577
Cellular component	GO:0016507	mitochondrial fatty acid beta-oxidation multienzyme complex	2	2	1	3.02678e-05	0.000417264
Cellular component	GO:0005759	mitochondrial matrix	219	8	0.0365297	3.1648e-05	0.000407204
Cellular component	GO:0032982	myosin filament	12	3	0.25	3.5036e-05	0.000422621
Cellular component	GO:0017133	mitochondrial electron transfer flavoprotein complex	3	2	0.666667	9.04731e-05	0.00102714
Cellular component	GO:0030016	myofibril	44	4	0.0909091	0.000102451	0.0010985
Cellular component	GO:0016020	membrane	2659	30	0.0112824	0.000140987	0.00143213
Cellular component	GO:0005747	mitochondrial respiratory chain complex I	55	4	0.0727273	0.000245508	0.00236915
Cellular component	GO:0045252	oxoglutarate dehydrogenase complex	5	2	0.4	0.000299388	0.00275152
Cellular component	GO:0043209	myelin sheath	329	8	0.0243161	0.000513794	0.00450738
Cellular component	GO:0045121	membrane raft	263	7	0.026616	0.000677232	0.00568286
Cellular component	GO:0020005	symbiont-containing vacuole membrane	11	2	0.181818	0.00161109	0.0129559
Cellular component	GO:0005859	muscle myosin complex	12	2	0.166667	0.0019263	0.0148711
Cellular component	GO:0005883	neurofilament	12	2	0.166667	0.0019263	0.0142991
Cellular component	GO:0005811	lipid droplet	95	4	0.0421053	0.00193112	0.013804
Cellular component	GO:0042627	chylomicron	13	2	0.153846	0.00226829	0.015635
Cellular component	GO:0005750	mitochondrial respiratory chain complex III	13	2	0.153846	0.00226829	0.0150959
Cellular component	GO:0005782	peroxisomal matrix	15	2	0.133333	0.0030314	0.019502
Cellular component	GO:0043231	intracellular membrane-bounded organelle	648	10	0.0154321	0.00336244	0.0209339
Cellular component	GO:0034361	very-low-density lipoprotein particle	19	2	0.105263	0.00486584	0.0293471
Cellular component	GO:0031672	A band	19	2	0.105263	0.00486584	0.0284578
Cellular component	GO:0055036	virion membrane	1	1	1	0.00551615	0.0313123
Cellular component	GO:0019031	viral envelope	1	1	1	0.00551615	0.0304177
Cellular component	GO:0045275	respiratory chain complex III	1	1	1	0.00551615	0.0295727
Cellular component	GO:0097631	integral component of omegasome membrane	1	1	1	0.00551615	0.0287735
Cellular component	GO:0031305	integral component of mitochondrial inner membrane	24	2	0.0833333	0.00771296	0.0391737
Cellular component	GO:0005576	extracellular region	1223	14	0.0114473	0.00817302	0.040446
Cellular component	GO:0031526	brush border membrane	82	3	0.0365854	0.0106335	0.0513068
Cellular component	GO:0034365	discoidal high-density lipoprotein particle	2	1	0.5	0.011002	0.0517901
Cellular component	GO:0001725	stress fiber	88	3	0.0340909	0.0128642	0.0591142
Cellular component	GO:0005829	cytosol	4035	33	0.00817844	0.0133627	0.0599768
Cellular component	GO:0005771	multivesicular body	34	2	0.0588235	0.0151227	0.0663335
Cellular component	GO:0005783	endoplasmic reticulum	1191	13	0.0109152	0.0152763	0.0655183
Cellular component	GO:0005967	mitochondrial pyruvate dehydrogenase complex	3	1	0.333333	0.0164578	0.0690513
Cellular component	GO:0005914	spot adherens junction	3	1	0.333333	0.0164578	0.0675821
Cellular component	GO:0005925	focal adhesion	477	7	0.0146751	0.0171088	0.0687917
Cellular component	GO:0034687	integrin alphaL-beta2 complex	4	1	0.25	0.0218837	0.0861949
Cellular component	GO:0098592	cytoplasmic side of apical plasma membrane	4	1	0.25	0.0218837	0.084471
Cellular component	GO:0033596	TSC1-TSC2 complex	4	1	0.25	0.0218837	0.0828147
Cellular component	GO:0071953	elastic fiber	4	1	0.25	0.0218837	0.0812221
Cellular component	GO:0005913	cell-cell adherens junction	108	3	0.0277778	0.0221023	0.0804857
Cellular component	GO:0016459	myosin complex	117	3	0.025641	0.0271756	0.0971274
Cellular component	GO:0031265	CD95 death-inducing signaling complex	5	1	0.2	0.0272797	0.0957271
Cellular component	GO:0009331	glycerol-3-phosphate dehydrogenase complex	5	1	0.2	0.0272797	0.0940177
Cellular component	GO:0045277	respiratory chain complex IV	5	1	0.2	0.0272797	0.0923682
Cellular component	GO:0071438	invadopodium membrane	5	1	0.2	0.0272797	0.0907757
Cellular component	GO:0097418	neurofibrillary tangle	5	1	0.2	0.0272797	0.0892371
Cellular component	GO:0019028	viral capsid	5	1	0.2	0.0272797	0.0877498
Cellular component	GO:0005802	trans-Golgi network	207	4	0.0193237	0.0280947	0.0888896
Cellular component	GO:0005765	lysosomal membrane	311	5	0.0160772	0.0295326	0.0919322
Cellular component	GO:0045095	keratin filament	125	3	0.024	0.0321618	0.0985275
Cellular component	GO:0005826	actomyosin contractile ring	6	1	0.166667	0.0326462	0.0984487
Cellular component	GO:0031264	death-inducing signaling complex	6	1	0.166667	0.0326462	0.0969341
Cellular component	GO:0033093	Weibel-Palade body	6	1	0.166667	0.0326462	0.0954654
Cellular component	GO:0034363	intermediate-density lipoprotein particle	6	1	0.166667	0.0326462	0.0940405
Cellular component	GO:0045254	pyruvate dehydrogenase complex	6	1	0.166667	0.0326462	0.0926576
Cellular component	GO:0045177	apical part of cell	130	3	0.0230769	0.0355043	0.099309
Cellular component	GO:0042645	mitochondrial nucleoid	54	2	0.037037	0.0359107	0.0990109
Cellular component	GO:0000220	vacuolar proton-transporting V-type ATPase, V0 domain	7	1	0.142857	0.0379832	0.10325
Cellular component	GO:0032541	cortical endoplasmic reticulum	7	1	0.142857	0.0379832	0.101816
Cellular component	GO:0030061	mitochondrial crista	8	1	0.125	0.0432909	0.114454
Cellular component	GO:0005746	mitochondrial respiratory chain	8	1	0.125	0.0432909	0.112907
Cellular component	GO:0032593	insulin-responsive compartment	8	1	0.125	0.0432909	0.111402
Cellular component	GO:0005791	rough endoplasmic reticulum	60	2	0.0333333	0.04348	0.110416
Cellular component	GO:0042383	sarcolemma	144	3	0.0208333	0.0457726	0.114729
Cellular component	GO:0031314	extrinsic component of mitochondrial inner membrane	9	1	0.111111	0.0485695	0.120178
Cellular component	GO:0031410	cytoplasmic vesicle	360	5	0.0138889	0.0499438	0.122015

## Sheet: Molecular function
Supplementary Table 1. The data of GO enrichment analysis including cellular component, molecular function and biological process.
Category	Term ID	Term	Term num	Count	Gene Ratio	P Value	FDR
Molecular function	GO:0008035	high-density lipoprotein particle binding	11	5	0.454545	2.0138e-09	5.90043e-07
Molecular function	GO:0004129	cytochrome-c oxidase activity	35	5	0.142857	1.27319e-06	0.000186523
Molecular function	GO:0005102	receptor binding	423	12	0.0283688	3.8539e-06	0.000376397
Molecular function	GO:0004300	enoyl-CoA hydratase activity	8	3	0.375	8.66119e-06	0.000634432
Molecular function	GO:0002020	protease binding	137	7	0.0510949	1.054e-05	0.000617645
Molecular function	GO:0004064	arylesterase activity	9	3	0.333333	1.29398e-05	0.000631894
Molecular function	GO:0016508	long-chain-enoyl-CoA hydratase activity	2	2	1	2.93707e-05	0.00122938
Molecular function	GO:0004658	propionyl-CoA carboxylase activity	2	2	1	2.93707e-05	0.0010757
Molecular function	GO:0050660	flavin adenine dinucleotide binding	127	6	0.0472441	7.09484e-05	0.00230976
Molecular function	GO:0003995	acyl-CoA dehydrogenase activity	16	3	0.1875	8.38803e-05	0.00245769
Molecular function	GO:0034190	apolipoprotein receptor binding	3	2	0.666667	8.77966e-05	0.00233858
Molecular function	GO:0019166	trans-2-enoyl-CoA reductase (NADPH) activity	3	2	0.666667	8.77966e-05	0.0021437
Molecular function	GO:0070653	high-density lipoprotein particle receptor binding	4	2	0.5	0.000174965	0.00394343
Molecular function	GO:0003988	acetyl-CoA C-acyltransferase activity	4	2	0.5	0.000174965	0.00366176
Molecular function	GO:0008865	fructokinase activity	4	2	0.5	0.000174965	0.00341764
Molecular function	GO:0019158	mannokinase activity	4	2	0.5	0.000174965	0.00320404
Molecular function	GO:0016509	long-chain-3-hydroxyacyl-CoA dehydrogenase activity	4	2	0.5	0.000174965	0.00301557
Molecular function	GO:0019825	oxygen binding	23	3	0.130435	0.00025795	0.00419885
Molecular function	GO:0004089	carbonate dehydratase activity	23	3	0.130435	0.00025795	0.00397786
Molecular function	GO:0004869	cysteine-type endopeptidase inhibitor activity	57	4	0.0701754	0.000265931	0.00389589
Molecular function	GO:0004449	isocitrate dehydrogenase (NAD+) activity	5	2	0.4	0.000290564	0.00405406
Molecular function	GO:0031072	heat shock protein binding	62	4	0.0645161	0.000367714	0.00489728
Molecular function	GO:0070991	medium-chain-acyl-CoA dehydrogenase activity	6	2	0.333333	0.000434287	0.00553244
Molecular function	GO:0055102	lipase inhibitor activity	6	2	0.333333	0.000434287	0.00530192
Molecular function	GO:0008121	ubiquinol-cytochrome-c reductase activity	6	2	0.333333	0.000434287	0.00508984
Molecular function	GO:0003857	3-hydroxyacyl-CoA dehydrogenase activity	7	2	0.285714	0.000605828	0.00682721
Molecular function	GO:0051287	NAD binding	74	4	0.0540541	0.000721052	0.00782475
Molecular function	GO:0060228	phosphatidylcholine-sterol O-acyltransferase activator activity	8	2	0.25	0.000804883	0.00842253
Molecular function	GO:0071813	lipoprotein particle binding	9	2	0.222222	0.00103115	0.0104182
Molecular function	GO:0004396	hexokinase activity	10	2	0.2	0.00128434	0.0125437
Molecular function	GO:0008137	NADH dehydrogenase (ubiquinone) activity	41	3	0.0731707	0.00144516	0.0136591
Molecular function	GO:0004867	serine-type endopeptidase inhibitor activity	155	5	0.0322581	0.00162221	0.0148534
Molecular function	GO:0051015	actin filament binding	312	7	0.0224359	0.00165736	0.0147153
Molecular function	GO:0004340	glucokinase activity	12	2	0.166667	0.00187028	0.0161174
Molecular function	GO:0004165	dodecenoyl-CoA delta-isomerase activity	12	2	0.166667	0.00187028	0.0156569
Molecular function	GO:0005548	phospholipid transporter activity	14	2	0.142857	0.00256036	0.0208385
Molecular function	GO:0004075	biotin carboxylase activity	14	2	0.142857	0.00256036	0.0202753
Molecular function	GO:0008289	lipid binding	175	5	0.0285714	0.00274967	0.0212014
Molecular function	GO:0030169	low-density lipoprotein particle binding	17	2	0.117647	0.00378572	0.0284415
Molecular function	GO:0001540	amyloid-beta binding	60	3	0.05	0.00430235	0.0315147
Molecular function	GO:0005198	structural molecule activity	284	6	0.0211268	0.00472412	0.0337602
Molecular function	GO:0008191	metalloendopeptidase inhibitor activity	19	2	0.105263	0.00472618	0.0329707
Molecular function	GO:0048037	cofactor binding	20	2	0.1	0.00523264	0.035655
Molecular function	GO:0005360	insulin-responsive hydrogen	1	1	1	0.00543512	0.036193
Molecular function	GO:0033989	3alpha,7alpha,12alpha-trihydroxy-5beta-cholest-24-enoyl-CoA hydratase activity	1	1	1	0.00543512	0.0353887
Molecular function	GO:0008111	alpha-methylacyl-CoA racemase activity	1	1	1	0.00543512	0.0346194
Molecular function	GO:0000250	lanosterol synthase activity	1	1	1	0.00543512	0.0338828
Molecular function	GO:0008442	3-hydroxyisobutyrate dehydrogenase activity	1	1	1	0.00543512	0.0331769
Molecular function	GO:0004149	dihydrolipoyllysine-residue succinyltransferase activity	1	1	1	0.00543512	0.0324998
Molecular function	GO:0004774	succinate-CoA ligase activity	1	1	1	0.00543512	0.0318498
Molecular function	GO:0046921	alpha-(1->6)-fucosyltransferase activity	1	1	1	0.00543512	0.0312253
Molecular function	GO:0034602	oxoglutarate dehydrogenase (NAD+) activity	1	1	1	0.00543512	0.0306248
Molecular function	GO:0044594	17-beta-hydroxysteroid dehydrogenase (NAD+) activity	1	1	1	0.00543512	0.030047
Molecular function	GO:0000772	mating pheromone activity	1	1	1	0.00543512	0.0294906
Molecular function	GO:0097160	polychlorinated biphenyl binding	1	1	1	0.00543512	0.0289544
Molecular function	GO:0016421	CoA carboxylase activity	1	1	1	0.00543512	0.0284373
Molecular function	GO:0015439	heme-transporting ATPase activity	1	1	1	0.00543512	0.0279384
Molecular function	GO:0004742	dihydrolipoyllysine-residue acetyltransferase activity	1	1	1	0.00543512	0.0274567
Molecular function	GO:0008445	D-aspartate oxidase activity	1	1	1	0.00543512	0.0269914
Molecular function	GO:0008424	glycoprotein 6-alpha-L-fucosyltransferase activity	1	1	1	0.00543512	0.0265415
Molecular function	GO:0047988	hydroxyacid-oxoacid transhydrogenase activity	1	1	1	0.00543512	0.0261064
Molecular function	GO:0005476	carnitine	1	1	1	0.00543512	0.0256853
Molecular function	GO:0005319	lipid transporter activity	21	2	0.0952381	0.00576289	0.026802
Molecular function	GO:0005536	glucose binding	21	2	0.0952381	0.00576289	0.0263832
Molecular function	GO:0042803	protein homodimerization activity	1078	13	0.0120594	0.00621471	0.028014
Molecular function	GO:0016853	isomerase activity	22	2	0.0909091	0.00631666	0.0280421
Molecular function	GO:0031210	phosphatidylcholine binding	22	2	0.0909091	0.00631666	0.0276236
Molecular function	GO:0000146	microfilament motor activity	23	2	0.0869565	0.00689368	0.0297036
Molecular function	GO:0016209	antioxidant activity	24	2	0.0833333	0.00749368	0.031821
Molecular function	GO:0017127	cholesterol transporter activity	24	2	0.0833333	0.00749368	0.0313664
Molecular function	GO:0019899	enzyme binding	429	7	0.016317	0.00929185	0.0383452
Molecular function	GO:0005543	phospholipid binding	82	3	0.0365854	0.0102086	0.0415432
Molecular function	GO:0016818	hydrolase activity, acting on acid anhydrides, in phosphorus-containing anhydrides	2	1	0.5	0.0108409	0.043512
Molecular function	GO:0017099	very-long-chain-acyl-CoA dehydrogenase activity	2	1	0.5	0.0108409	0.042924
Molecular function	GO:0016836	hydro-lyase activity	2	1	0.5	0.0108409	0.0423517
Molecular function	GO:0004775	succinate-CoA ligase (ADP-forming) activity	2	1	0.5	0.0108409	0.0417944
Molecular function	GO:0015227	acyl carnitine transmembrane transporter activity	2	1	0.5	0.0108409	0.0412517
Molecular function	GO:0070892	lipoteichoic acid receptor activity	2	1	0.5	0.0108409	0.0407228
Molecular function	GO:0004621	glycosylphosphatidylinositol phospholipase D activity	2	1	0.5	0.0108409	0.0402073
Molecular function	GO:0004063	aryldialkylphosphatase activity	2	1	0.5	0.0108409	0.0397047
Molecular function	GO:0052591	sn-glycerol-3-phosphate	2	1	0.5	0.0108409	0.0392145
Molecular function	GO:0072555	17-beta-ketosteroid reductase activity	2	1	0.5	0.0108409	0.0387363
Molecular function	GO:0072582	17-beta-hydroxysteroid dehydrogenase (NADP+) activity	2	1	0.5	0.0108409	0.0382696
Molecular function	GO:0070506	high-density lipoprotein particle receptor activity	2	1	0.5	0.0108409	0.037814
Molecular function	GO:0042056	chemoattractant activity	30	2	0.0666667	0.0115618	0.0398541
Molecular function	GO:0000062	fatty-acyl-CoA binding	31	2	0.0645161	0.0123154	0.0419583
Molecular function	GO:0042802	identical protein binding	1336	14	0.010479	0.0146108	0.0492066
Molecular function	GO:0000166	nucleotide binding	94	3	0.0319149	0.0147403	0.0490784
Molecular function	GO:0051087	chaperone binding	96	3	0.03125	0.0155892	0.0513219
Molecular function	GO:0034617	tetrahydrobiopterin binding	3	1	0.333333	0.0162174	0.0527967
Molecular function	GO:0003986	acetyl-CoA hydrolase activity	3	1	0.333333	0.0162174	0.0522165
Molecular function	GO:0018479	benzaldehyde dehydrogenase (NAD+) activity	3	1	0.333333	0.0162174	0.051649
Molecular function	GO:0015265	urea channel activity	3	1	0.333333	0.0162174	0.0510936
Molecular function	GO:0015369	calcium	3	1	0.333333	0.0162174	0.05055
Molecular function	GO:0046538	2,3-bisphosphoglycerate-dependent phosphoglycerate mutase activity	3	1	0.333333	0.0162174	0.0500179
Molecular function	GO:0043120	tumor necrosis factor binding	3	1	0.333333	0.0162174	0.0494969
Molecular function	GO:0015254	glycerol channel activity	3	1	0.333333	0.0162174	0.0489866
Molecular function	GO:0102007	acyl-L-homoserine-lactone lactonohydrolase activity	3	1	0.333333	0.0162174	0.0484868
Molecular function	GO:0008106	alcohol dehydrogenase (NADP+) activity	3	1	0.333333	0.0162174	0.047997
Molecular function	GO:0016401	palmitoyl-CoA oxidase activity	3	1	0.333333	0.0162174	0.047517
Molecular function	GO:0017077	oxidative phosphorylation uncoupler activity	3	1	0.333333	0.0162174	0.0470466
Molecular function	GO:0071949	FAD binding	39	2	0.0512821	0.0190775	0.0548011
Molecular function	GO:0032403	protein complex binding	285	5	0.0175439	0.0200842	0.0571326
Molecular function	GO:0004740	pyruvate dehydrogenase (acetyl-transferring) kinase activity	4	1	0.25	0.0215649	0.060755
Molecular function	GO:0034191	apolipoprotein A-I receptor binding	4	1	0.25	0.0215649	0.0601763
Molecular function	GO:0030369	ICAM-3 receptor activity	4	1	0.25	0.0215649	0.0596086
Molecular function	GO:0001851	complement component C3b binding	4	1	0.25	0.0215649	0.0590516
Molecular function	GO:0034186	apolipoprotein A-I binding	4	1	0.25	0.0215649	0.0585048
Molecular function	GO:0004616	phosphogluconate dehydrogenase (decarboxylating) activity	4	1	0.25	0.0215649	0.057968
Molecular function	GO:0102420	sn-1-glycerol-3-phosphate C16	4	1	0.25	0.0215649	0.0574411
Molecular function	GO:0005324	long-chain fatty acid transporter activity	4	1	0.25	0.0215649	0.0569236
Molecular function	GO:0004366	glycerol-3-phosphate O-acyltransferase activity	4	1	0.25	0.0215649	0.0564153
Molecular function	GO:0005329	dopamine transmembrane transporter activity	4	1	0.25	0.0215649	0.0559161
Molecular function	GO:0019834	phospholipase A2 inhibitor activity	4	1	0.25	0.0215649	0.0554256
Molecular function	GO:0000253	3-keto sterol reductase activity	4	1	0.25	0.0215649	0.0549436
Molecular function	GO:0004095	carnitine O-palmitoyltransferase activity	4	1	0.25	0.0215649	0.05447
Molecular function	GO:0050699	WW domain binding	42	2	0.047619	0.0219336	0.0549276
Molecular function	GO:0015485	cholesterol binding	45	2	0.0444444	0.0249545	0.0619634
Molecular function	GO:0019900	kinase binding	118	3	0.0254237	0.0267238	0.0657989
Molecular function	GO:0004511	tyrosine 3-monooxygenase activity	5	1	0.2	0.0268835	0.0656405
Molecular function	GO:0102499	SHG alpha-glucan phosphorylase activity	5	1	0.2	0.0268835	0.065098
Molecular function	GO:0004028	3-chloroallyl aldehyde dehydrogenase activity	5	1	0.2	0.0268835	0.0645644
Molecular function	GO:0003987	acetate-CoA ligase activity	5	1	0.2	0.0268835	0.0640395
Molecular function	GO:0008609	alkylglycerone-phosphate synthase activity	5	1	0.2	0.0268835	0.0635231
Molecular function	GO:0102250	linear malto-oligosaccharide phosphorylase activity	5	1	0.2	0.0268835	0.0630149
Molecular function	GO:0009374	biotin binding	5	1	0.2	0.0268835	0.0625148
Molecular function	GO:0019865	immunoglobulin binding	5	1	0.2	0.0268835	0.0620225
Molecular function	GO:0008431	vitamin E binding	5	1	0.2	0.0268835	0.061538
Molecular function	GO:0004619	phosphoglycerate mutase activity	5	1	0.2	0.0268835	0.0610609
Molecular function	GO:0004176	ATP-dependent peptidase activity	5	1	0.2	0.0268835	0.0605912
Molecular function	GO:0034604	pyruvate dehydrogenase (NAD+) activity	5	1	0.2	0.0268835	0.0601287
Molecular function	GO:0001875	lipopolysaccharide receptor activity	5	1	0.2	0.0268835	0.0596732
Molecular function	GO:0008184	glycogen phosphorylase activity	5	1	0.2	0.0268835	0.0592245
Molecular function	GO:0003989	acetyl-CoA carboxylase activity	5	1	0.2	0.0268835	0.0587825
Molecular function	GO:0008379	thioredoxin peroxidase activity	5	1	0.2	0.0268835	0.0583471
Molecular function	GO:0015101	organic cation transmembrane transporter activity	5	1	0.2	0.0268835	0.0579181
Molecular function	GO:0015651	quaternary ammonium group transmembrane transporter activity	5	1	0.2	0.0268835	0.0574953
Molecular function	GO:0035662	Toll-like receptor 4 binding	6	1	0.166667	0.0321733	0.06831
Molecular function	GO:0004591	oxoglutarate dehydrogenase (succinyl-transferring) activity	6	1	0.166667	0.0321733	0.0678186
Molecular function	GO:0004082	bisphosphoglycerate mutase activity	6	1	0.166667	0.0321733	0.0673342
Molecular function	GO:0047485	protein N-terminus binding	128	3	0.0234375	0.0328749	0.0683146
Molecular function	GO:0004111	creatine kinase activity	7	1	0.142857	0.0374346	0.0772418
Molecular function	GO:0015562	efflux transmembrane transporter activity	7	1	0.142857	0.0374346	0.0767016
Molecular function	GO:0003954	NADH dehydrogenase activity	7	1	0.142857	0.0374346	0.076169
Molecular function	GO:0050544	arachidonic acid binding	7	1	0.142857	0.0374346	0.0756437
Molecular function	GO:0015137	citrate transmembrane transporter activity	8	1	0.125	0.0426674	0.085627
Molecular function	GO:0043559	insulin binding	8	1	0.125	0.0426674	0.0850445
Molecular function	GO:0043023	ribosomal large subunit binding	8	1	0.125	0.0426674	0.0844699
Molecular function	GO:0102391	decanoate--CoA ligase activity	8	1	0.125	0.0426674	0.083903
Molecular function	GO:0008526	phosphatidylinositol transporter activity	8	1	0.125	0.0426674	0.0833436
Molecular function	GO:0004022	alcohol dehydrogenase (NAD) activity	8	1	0.125	0.0426674	0.0827917
Molecular function	GO:0050786	RAGE receptor binding	8	1	0.125	0.0426674	0.082247
Molecular function	GO:0003997	acyl-CoA oxidase activity	8	1	0.125	0.0426674	0.0817094
Molecular function	GO:0070324	thyroid hormone binding	8	1	0.125	0.0426674	0.0811789
Molecular function	GO:0015643	toxic substance binding	9	1	0.111111	0.0478719	0.0904934
Molecular function	GO:0005009	insulin-activated receptor activity	9	1	0.111111	0.0478719	0.0899133
Molecular function	GO:1901612	cardiolipin binding	9	1	0.111111	0.0478719	0.0893406
Molecular function	GO:0042171	lysophosphatidic acid acyltransferase activity	9	1	0.111111	0.0478719	0.0887751
Molecular function	GO:0015226	carnitine transmembrane transporter activity	9	1	0.111111	0.0478719	0.0882168
Molecular function	GO:0019534	toxin transmembrane transporter activity	9	1	0.111111	0.0478719	0.0876655

## Sheet: Biological process
Supplementary Table 1. The data of GO enrichment analysis including cellular component, molecular function and biological process.
Category	Term ID	Term	Term num	Count	Gene Ratio	P Value	FDR
Biological process	GO:0006635	fatty acid beta-oxidation	55	10	0.181818	4.09278e-13	3.52389e-10
Biological process	GO:0033539	fatty acid beta-oxidation using acyl-CoA dehydrogenase	26	6	0.230769	4.982e-09	2.14475e-06
Biological process	GO:0006631	fatty acid metabolic process	61	7	0.114754	4.23418e-08	1.21521e-05
Biological process	GO:0006099	tricarboxylic acid cycle	39	6	0.153846	6.65908e-08	1.43337e-05
Biological process	GO:0009409	response to cold	51	6	0.117647	3.48279e-07	5.99737e-05
Biological process	GO:0014823	response to activity	49	5	0.102041	7.05032e-06	0.00101172
Biological process	GO:0046689	response to mercury ion	8	3	0.375	8.68041e-06	0.00106769
Biological process	GO:0043434	response to peptide hormone	53	5	0.0943396	1.04255e-05	0.00112204
Biological process	GO:0055114	oxidation-reduction process	146	7	0.0479452	1.5983e-05	0.00152904
Biological process	GO:0070508	cholesterol import	10	3	0.3	1.84523e-05	0.00158874
Biological process	GO:0044406	adhesion of symbiont to host	11	3	0.272727	2.52704e-05	0.00197799
Biological process	GO:0007584	response to nutrient	64	5	0.078125	2.63956e-05	0.00189389
Biological process	GO:0031667	response to nutrient levels	37	4	0.108108	4.85069e-05	0.00321265
Biological process	GO:0051384	response to glucocorticoid	76	5	0.0657895	6.06852e-05	0.00373214
Biological process	GO:0034375	high-density lipoprotein particle remodeling	16	3	0.1875	8.40658e-05	0.00482538
Biological process	GO:0018158	protein oxidation	3	2	0.666667	8.79482e-05	0.00473271
Biological process	GO:0010903	negative regulation of very-low-density lipoprotein particle remodeling	3	2	0.666667	8.79482e-05	0.00445432
Biological process	GO:0006936	muscle contraction	83	5	0.060241	9.24948e-05	0.00442434
Biological process	GO:0006122	mitochondrial electron transport, ubiquinol to cytochrome c	17	3	0.176471	0.000101672	0.00460735
Biological process	GO:0043691	reverse cholesterol transport	17	3	0.176471	0.000101672	0.00437699
Biological process	GO:0006656	phosphatidylcholine biosynthetic process	17	3	0.176471	0.000101672	0.00416856
Biological process	GO:0050873	brown fat cell differentiation	45	4	0.0888889	0.000105786	0.00414007
Biological process	GO:0042493	response to drug	345	9	0.026087	0.000121697	0.00455571
Biological process	GO:0001666	response to hypoxia	211	7	0.0331754	0.000164046	0.00588514
Biological process	GO:0030301	cholesterol transport	20	3	0.15	0.000168417	0.00580028
Biological process	GO:0060192	negative regulation of lipase activity	4	2	0.5	0.000175266	0.00580401
Biological process	GO:0006633	fatty acid biosynthetic process	54	4	0.0740741	0.000216155	0.00689293
Biological process	GO:0034384	high-density lipoprotein particle clearance	5	2	0.4	0.000291065	0.00895024
Biological process	GO:0018206	peptidyl-methionine modification	5	2	0.4	0.000291065	0.00864161
Biological process	GO:0002740	negative regulation of cytokine secretion involved in immune response	5	2	0.4	0.000291065	0.00835356
Biological process	GO:0006104	succinyl-CoA metabolic process	5	2	0.4	0.000291065	0.00808409
Biological process	GO:0007031	peroxisome organization	24	3	0.125	0.000294272	0.00791775
Biological process	GO:0051180	vitamin transport	6	2	0.333333	0.000435035	0.0113504
Biological process	GO:0046322	negative regulation of fatty acid oxidation	6	2	0.333333	0.000435035	0.0110166
Biological process	GO:0030300	regulation of intestinal cholesterol absorption	6	2	0.333333	0.000435035	0.0107019
Biological process	GO:0007595	lactation	69	4	0.057971	0.000554641	0.0132652
Biological process	GO:0006885	regulation of pH	30	3	0.1	0.000576318	0.0134111
Biological process	GO:0050996	positive regulation of lipid catabolic process	7	2	0.285714	0.00060687	0.0137504
Biological process	GO:0015670	carbon dioxide transport	7	2	0.285714	0.00060687	0.0133978
Biological process	GO:0008211	glucocorticoid metabolic process	7	2	0.285714	0.00060687	0.0130629
Biological process	GO:0010886	positive regulation of cholesterol storage	8	2	0.25	0.000806266	0.0169316
Biological process	GO:0061732	mitochondrial acetyl-CoA biosynthetic process from pyruvate	8	2	0.25	0.000806266	0.0165285
Biological process	GO:0010043	response to zinc ion	34	3	0.0882353	0.000835991	0.0167393
Biological process	GO:0006096	glycolytic process	81	4	0.0493827	0.00101483	0.0198583
Biological process	GO:0006734	NADH metabolic process	9	2	0.222222	0.00103292	0.0197632
Biological process	GO:0034380	high-density lipoprotein particle assembly	9	2	0.222222	0.00103292	0.0193336
Biological process	GO:0006953	acute-phase response	38	3	0.0789474	0.00115992	0.0212487
Biological process	GO:0033344	cholesterol efflux	39	3	0.0769231	0.00125159	0.0224503
Biological process	GO:0009060	aerobic respiration	40	3	0.075	0.00134769	0.0236809
Biological process	GO:0008203	cholesterol metabolic process	90	4	0.0444444	0.00150073	0.0258426
Biological process	GO:0010884	positive regulation of lipid storage	12	2	0.166667	0.00187347	0.0316287
Biological process	GO:0016559	peroxisome fission	13	2	0.153846	0.00220621	0.0365297
Biological process	GO:0033700	phospholipid efflux	13	2	0.153846	0.00220621	0.0358404
Biological process	GO:0031100	animal organ regeneration	49	3	0.0612245	0.00242485	0.0386628
Biological process	GO:0006730	one-carbon metabolic process	49	3	0.0612245	0.00242485	0.0379599
Biological process	GO:0006091	generation of precursor metabolites and energy	14	2	0.142857	0.00256473	0.0394327
Biological process	GO:0010898	positive regulation of triglyceride catabolic process	14	2	0.142857	0.00256473	0.0387409
Biological process	GO:0010873	positive regulation of cholesterol esterification	14	2	0.142857	0.00256473	0.0380729
Biological process	GO:0046470	phosphatidylcholine metabolic process	15	2	0.133333	0.00294875	0.0430317
Biological process	GO:0006123	mitochondrial electron transport, cytochrome c to oxygen	15	2	0.133333	0.00294875	0.0423146
Biological process	GO:0030194	positive regulation of blood coagulation	16	2	0.125	0.00335799	0.0473972
Biological process	GO:0097284	hepatocyte apoptotic process	16	2	0.125	0.00335799	0.0466327
Biological process	GO:0032981	mitochondrial respiratory chain complex I assembly	55	3	0.0545455	0.00337167	0.0460795
Biological process	GO:0006839	mitochondrial transport	56	3	0.0535714	0.00354843	0.0477375
Biological process	GO:0042744	hydrogen peroxide catabolic process	17	2	0.117647	0.00379217	0.0502316
Biological process	GO:0043534	blood vessel endothelial cell migration	17	2	0.117647	0.00379217	0.0494705
Biological process	GO:0051412	response to corticosterone	17	2	0.117647	0.00379217	0.0487322
Biological process	GO:0070542	response to fatty acid	17	2	0.117647	0.00379217	0.0480155
Biological process	GO:0000002	mitochondrial genome maintenance	17	2	0.117647	0.00379217	0.0473196
Biological process	GO:0071404	cellular response to low-density lipoprotein particle stimulus	17	2	0.117647	0.00379217	0.0466436
Biological process	GO:0051006	positive regulation of lipoprotein lipase activity	17	2	0.117647	0.00379217	0.0459867
Biological process	GO:0014070	response to organic cyclic compound	58	3	0.0517241	0.0039187	0.0468611
Biological process	GO:0051496	positive regulation of stress fiber assembly	59	3	0.0508475	0.00411231	0.0485028
Biological process	GO:0006103	2-oxoglutarate metabolic process	18	2	0.111111	0.004251	0.0494609
Biological process	GO:0050995	negative regulation of lipid catabolic process	19	2	0.105263	0.0047342	0.0543487
Biological process	GO:0000038	very long-chain fatty acid metabolic process	19	2	0.105263	0.0047342	0.0536336
Biological process	GO:0034383	low-density lipoprotein particle clearance	19	2	0.105263	0.0047342	0.052937
Biological process	GO:0007155	cell adhesion	479	8	0.0167015	0.00486463	0.053698
Biological process	GO:0009636	response to toxic substance	128	4	0.03125	0.00534426	0.0582457
Biological process	GO:0051608	histamine transport	1	1	1	0.00544048	0.0585532
Biological process	GO:0016137	glycoside metabolic process	1	1	1	0.00544048	0.0578303
Biological process	GO:0015759	beta-glucoside transport	1	1	1	0.00544048	0.0571251
Biological process	GO:0046434	organophosphate catabolic process	1	1	1	0.00544048	0.0564368
Biological process	GO:0051793	medium-chain fatty acid catabolic process	1	1	1	0.00544048	0.0557649
Biological process	GO:0002071	glandular epithelial cell maturation	1	1	1	0.00544048	0.0551089
Biological process	GO:0060354	negative regulation of cell adhesion molecule production	1	1	1	0.00544048	0.0544681
Biological process	GO:0015938	coenzyme A catabolic process	1	1	1	0.00544048	0.053842
Biological process	GO:0036111	very long-chain fatty-acyl-CoA metabolic process	1	1	1	0.00544048	0.0532302
Biological process	GO:0036071	N-glycan fucosylation	1	1	1	0.00544048	0.0526321
Biological process	GO:0090152	establishment of protein localization to mitochondrial membrane involved in mitochondrial fission	1	1	1	0.00544048	0.0520473
Biological process	GO:1903580	positive regulation of ATP metabolic process	1	1	1	0.00544048	0.0514753
Biological process	GO:0008300	isoprenoid catabolic process	1	1	1	0.00544048	0.0509158
Biological process	GO:1903935	response to sodium arsenite	1	1	1	0.00544048	0.0503683
Biological process	GO:0046368	GDP-L-fucose metabolic process	1	1	1	0.00544048	0.0498325
Biological process	GO:0010021	amylopectin biosynthetic process	1	1	1	0.00544048	0.049308
Biological process	GO:0002737	negative regulation of plasmacytoid dendritic cell cytokine production	1	1	1	0.00544048	0.0487943
Biological process	GO:0043112	receptor metabolic process	1	1	1	0.00544048	0.0482913
Biological process	GO:0042214	terpene metabolic process	1	1	1	0.00544048	0.0477985
Biological process	GO:0019836	hemolysis by symbiont of host erythrocytes	1	1	1	0.00544048	0.0473157
Biological process	GO:0051615	histamine uptake	1	1	1	0.00544048	0.0468426
Biological process	GO:0009386	translational attenuation	1	1	1	0.00544048	0.0463788
Biological process	GO:0015993	molecular hydrogen transport	1	1	1	0.00544048	0.0459241
Biological process	GO:0045113	regulation of integrin biosynthetic process	1	1	1	0.00544048	0.0454782
Biological process	GO:0019478	D-amino acid catabolic process	1	1	1	0.00544048	0.0450409
Biological process	GO:0060695	negative regulation of cholesterol transporter activity	1	1	1	0.00544048	0.044612
Biological process	GO:0035461	vitamin transmembrane transport	1	1	1	0.00544048	0.0441911
Biological process	GO:0009132	nucleoside diphosphate metabolic process	1	1	1	0.00544048	0.0437781
Biological process	GO:0045105	intermediate filament polymerization or depolymerization	1	1	1	0.00544048	0.0433727
Biological process	GO:0014850	response to muscle activity	22	2	0.0909091	0.00632735	0.0499802
Biological process	GO:0043627	response to estrogen	73	3	0.0410959	0.00744417	0.0582675
Biological process	GO:0045109	intermediate filament organization	24	2	0.0833333	0.00750634	0.0582248
Biological process	GO:0050892	intestinal absorption	24	2	0.0833333	0.00750634	0.057705
Biological process	GO:0006941	striated muscle contraction	24	2	0.0833333	0.00750634	0.0571943
Biological process	GO:0032496	response to lipopolysaccharide	223	5	0.0224215	0.00762537	0.0575916
Biological process	GO:0030048	actin filament-based movement	25	2	0.08	0.0081301	0.0608697
Biological process	GO:0001935	endothelial cell proliferation	25	2	0.08	0.0081301	0.060345
Biological process	GO:0048255	mRNA stabilization	26	2	0.0769231	0.00877636	0.064585
Biological process	GO:0035634	response to stilbenoid	27	2	0.0740741	0.00944485	0.0689154
Biological process	GO:0034097	response to cytokine	81	3	0.037037	0.00989495	0.0715929
Biological process	GO:0010906	regulation of glucose metabolic process	29	2	0.0689655	0.0108475	0.0778309
Biological process	GO:0097749	membrane tubulation	2	1	0.5	0.0108515	0.0772164
Biological process	GO:0044381	glucose import in response to insulin stimulus	2	1	0.5	0.0108515	0.0765834
Biological process	GO:0034381	plasma lipoprotein particle clearance	2	1	0.5	0.0108515	0.0759608
Biological process	GO:1904209	positive regulation of chemokine (C-C motif) ligand 2 secretion	2	1	0.5	0.0108515	0.0753482
Biological process	GO:0070488	neutrophil aggregation	2	1	0.5	0.0108515	0.0747454
Biological process	GO:0019318	hexose metabolic process	2	1	0.5	0.0108515	0.0741522
Biological process	GO:0031444	slow-twitch skeletal muscle fiber contraction	2	1	0.5	0.0108515	0.0735683
Biological process	GO:0010565	regulation of cellular ketone metabolic process	2	1	0.5	0.0108515	0.0729936
Biological process	GO:0018171	peptidyl-cysteine oxidation	2	1	0.5	0.0108515	0.0724277
Biological process	GO:0071478	cellular response to radiation	2	1	0.5	0.0108515	0.0718706
Biological process	GO:0042745	circadian sleep/wake cycle	2	1	0.5	0.0108515	0.071322
Biological process	GO:0036112	medium-chain fatty-acyl-CoA metabolic process	2	1	0.5	0.0108515	0.0707817
Biological process	GO:0032696	negative regulation of interleukin-13 production	2	1	0.5	0.0108515	0.0702495
Biological process	GO:0035606	peptidyl-cysteine S-trans-nitrosylation	2	1	0.5	0.0108515	0.0697252
Biological process	GO:0046395	carboxylic acid catabolic process	2	1	0.5	0.0108515	0.0692087
Biological process	GO:0034370	triglyceride-rich lipoprotein particle remodeling	2	1	0.5	0.0108515	0.0686998
Biological process	GO:0010712	regulation of collagen metabolic process	2	1	0.5	0.0108515	0.0681984
Biological process	GO:0051100	negative regulation of binding	2	1	0.5	0.0108515	0.0677042
Biological process	GO:0052314	phytoalexin metabolic process	2	1	0.5	0.0108515	0.0672171
Biological process	GO:1903937	response to acrylamide	2	1	0.5	0.0108515	0.066737
Biological process	GO:0071307	cellular response to vitamin K	2	1	0.5	0.0108515	0.0662637
Biological process	GO:0051659	maintenance of mitochondrion location	2	1	0.5	0.0108515	0.065797
Biological process	GO:0036337	Fas signaling pathway	2	1	0.5	0.0108515	0.0653369
Biological process	GO:0060621	negative regulation of cholesterol import	2	1	0.5	0.0108515	0.0648832
Biological process	GO:0033693	neurofilament bundle assembly	2	1	0.5	0.0108515	0.0644357
Biological process	GO:0033076	isoquinoline alkaloid metabolic process	2	1	0.5	0.0108515	0.0639944
Biological process	GO:2001150	positive regulation of dipeptide transmembrane transport	2	1	0.5	0.0108515	0.063559
Biological process	GO:0033306	phytol metabolic process	2	1	0.5	0.0108515	0.0631296
Biological process	GO:0006507	GPI anchor release	2	1	0.5	0.0108515	0.0627059
Biological process	GO:0014010	Schwann cell proliferation	2	1	0.5	0.0108515	0.0622879
Biological process	GO:1900076	regulation of cellular response to insulin stimulus	2	1	0.5	0.0108515	0.0618754
Biological process	GO:0046356	acetyl-CoA catabolic process	2	1	0.5	0.0108515	0.0614683
Biological process	GO:0006603	phosphocreatine metabolic process	2	1	0.5	0.0108515	0.0610665
Biological process	GO:0042418	epinephrine biosynthetic process	2	1	0.5	0.0108515	0.06067
Biological process	GO:0015920	lipopolysaccharide transport	2	1	0.5	0.0108515	0.0602786
Biological process	GO:0001300	chronological cell aging	2	1	0.5	0.0108515	0.0598922
Biological process	GO:0035491	positive regulation of leukotriene production involved in inflammatory response	2	1	0.5	0.0108515	0.0595107
Biological process	GO:0061044	negative regulation of vascular wound healing	2	1	0.5	0.0108515	0.059134
Biological process	GO:0071401	cellular response to triglyceride	2	1	0.5	0.0108515	0.0587621
Biological process	GO:0046314	phosphocreatine biosynthetic process	2	1	0.5	0.0108515	0.0583949
Biological process	GO:0006637	acyl-CoA metabolic process	30	2	0.0666667	0.0115812	0.061934
Biological process	GO:0031647	regulation of protein stability	87	3	0.0344828	0.012006	0.0638098
Biological process	GO:0051602	response to electrical stimulus	31	2	0.0645161	0.012336	0.0651615
Biological process	GO:0042475	odontogenesis of dentin-containing tooth	89	3	0.0337079	0.0127627	0.0670041
Biological process	GO:0070328	triglyceride homeostasis	34	2	0.0588235	0.0147255	0.0768401
Biological process	GO:0008016	regulation of heart contraction	34	2	0.0588235	0.0147255	0.0763772
Biological process	GO:0006094	gluconeogenesis	35	2	0.0571429	0.0155627	0.0802365
Biological process	GO:0008053	mitochondrial fusion	35	2	0.0571429	0.0155627	0.0797589
Biological process	GO:0042998	positive regulation of Golgi to plasma membrane protein transport	3	1	0.333333	0.0162333	0.0827036
Biological process	GO:0032375	negative regulation of cholesterol transport	3	1	0.333333	0.0162333	0.0822171
Biological process	GO:0070230	positive regulation of lymphocyte apoptotic process	3	1	0.333333	0.0162333	0.0817363
Biological process	GO:1902806	regulation of cell cycle G1/S phase transition	3	1	0.333333	0.0162333	0.0812611
Biological process	GO:0015697	quaternary ammonium group transport	3	1	0.333333	0.0162333	0.0807914
Biological process	GO:0034021	response to silicon dioxide	3	1	0.333333	0.0162333	0.080327
Biological process	GO:0010636	positive regulation of mitochondrial fusion	3	1	0.333333	0.0162333	0.079868
Biological process	GO:2000098	negative regulation of smooth muscle cell-matrix adhesion	3	1	0.333333	0.0162333	0.0794142
Biological process	GO:0033540	fatty acid beta-oxidation using acyl-CoA oxidase	3	1	0.333333	0.0162333	0.0789656
Biological process	GO:0018963	phthalate metabolic process	3	1	0.333333	0.0162333	0.0785219
Biological process	GO:0033512	L-lysine catabolic process to acetyl-CoA via saccharopine	3	1	0.333333	0.0162333	0.0780833
Biological process	GO:0035821	modification of morphology or physiology of other organism	3	1	0.333333	0.0162333	0.0776495
Biological process	GO:1901856	negative regulation of cellular respiration	3	1	0.333333	0.0162333	0.0772205
Biological process	GO:0015910	peroxisomal long-chain fatty acid import	3	1	0.333333	0.0162333	0.0767962
Biological process	GO:0035795	negative regulation of mitochondrial membrane permeability	3	1	0.333333	0.0162333	0.0763765
Biological process	GO:0046320	regulation of fatty acid oxidation	3	1	0.333333	0.0162333	0.0759614
Biological process	GO:0006533	aspartate catabolic process	3	1	0.333333	0.0162333	0.0755508
Biological process	GO:0044375	regulation of peroxisome size	3	1	0.333333	0.0162333	0.0751447
Biological process	GO:1990542	mitochondrial transmembrane transport	3	1	0.333333	0.0162333	0.0747428
Biological process	GO:0070543	response to linoleic acid	3	1	0.333333	0.0162333	0.0743452
Biological process	GO:0007320	insemination	3	1	0.333333	0.0162333	0.0739519
Biological process	GO:2001295	malonyl-CoA biosynthetic process	3	1	0.333333	0.0162333	0.0735627
Biological process	GO:0007522	visceral muscle development	3	1	0.333333	0.0162333	0.0731775
Biological process	GO:0010716	negative regulation of extracellular matrix disassembly	3	1	0.333333	0.0162333	0.0727964
Biological process	GO:1903751	negative regulation of intrinsic apoptotic signaling pathway in response to hydrogen peroxide	3	1	0.333333	0.0162333	0.0724192
Biological process	GO:0006082	organic acid metabolic process	3	1	0.333333	0.0162333	0.0720459
Biological process	GO:2000334	positive regulation of blood microparticle formation	3	1	0.333333	0.0162333	0.0716764
Biological process	GO:0035330	regulation of hippo signaling	3	1	0.333333	0.0162333	0.0713107
Biological process	GO:0046223	aflatoxin catabolic process	3	1	0.333333	0.0162333	0.0709488
Biological process	GO:0042632	cholesterol homeostasis	101	3	0.029703	0.0178678	0.0776977
Biological process	GO:0042594	response to starvation	39	2	0.0512821	0.0191092	0.0826786
Biological process	GO:0001678	cellular glucose homeostasis	39	2	0.0512821	0.0191092	0.0822652
Biological process	GO:0006006	glucose metabolic process	105	3	0.0285714	0.0197868	0.0847585
Biological process	GO:0021766	hippocampus development	106	3	0.0283019	0.0202837	0.0864567
Biological process	GO:0046034	ATP metabolic process	41	2	0.0487805	0.0209977	0.0890591
Biological process	GO:1901253	negative regulation of intracellular transport of viral material	4	1	0.25	0.021586	0.0911058
Biological process	GO:0071221	cellular response to bacterial lipopeptide	4	1	0.25	0.021586	0.0906613
Biological process	GO:0045472	response to ether	4	1	0.25	0.021586	0.0902212
Biological process	GO:0032497	detection of lipopolysaccharide	4	1	0.25	0.021586	0.0897854
Biological process	GO:0060421	positive regulation of heart growth	4	1	0.25	0.021586	0.0893537
Biological process	GO:1900407	regulation of cellular response to oxidative stress	4	1	0.25	0.021586	0.0889262
Biological process	GO:0061034	olfactory bulb mitral cell layer development	4	1	0.25	0.021586	0.0885027
Biological process	GO:0033632	regulation of cell-cell adhesion mediated by integrin	4	1	0.25	0.021586	0.0880833
Biological process	GO:0032714	negative regulation of interleukin-5 production	4	1	0.25	0.021586	0.0876678
Biological process	GO:0045329	carnitine biosynthetic process	4	1	0.25	0.021586	0.0872562
Biological process	GO:0010899	regulation of phosphatidylcholine catabolic process	4	1	0.25	0.021586	0.0868485
Biological process	GO:0035701	hematopoietic stem cell migration	4	1	0.25	0.021586	0.0864445
Biological process	GO:0002793	positive regulation of peptide secretion	4	1	0.25	0.021586	0.0860443
Biological process	GO:0006084	acetyl-CoA metabolic process	4	1	0.25	0.021586	0.0856478
Biological process	GO:0006925	inflammatory cell apoptotic process	4	1	0.25	0.021586	0.0852549
Biological process	GO:0019724	B cell mediated immunity	4	1	0.25	0.021586	0.0848656
Biological process	GO:0051345	positive regulation of hydrolase activity	4	1	0.25	0.021586	0.0844799
Biological process	GO:0046684	response to pyrethroid	4	1	0.25	0.021586	0.0840976
Biological process	GO:0022028	tangential migration from the subventricular zone to the olfactory bulb	4	1	0.25	0.021586	0.0837188
Biological process	GO:0043456	regulation of pentose-phosphate shunt	4	1	0.25	0.021586	0.0833434
Biological process	GO:0097049	motor neuron apoptotic process	4	1	0.25	0.021586	0.0829713
Biological process	GO:0006907	pinocytosis	4	1	0.25	0.021586	0.0826026
Biological process	GO:0033590	response to cobalamin	4	1	0.25	0.021586	0.0822371
Biological process	GO:1904925	positive regulation of autophagy of mitochondrion in response to mitochondrial depolarization	4	1	0.25	0.021586	0.0818748
Biological process	GO:0016557	peroxisome membrane biogenesis	4	1	0.25	0.021586	0.0815157
Biological process	GO:0007039	protein catabolic process in the vacuole	4	1	0.25	0.021586	0.0811597
Biological process	GO:0015842	aminergic neurotransmitter loading into synaptic vesicle	4	1	0.25	0.021586	0.0808068
Biological process	GO:0015793	glycerol transport	4	1	0.25	0.021586	0.080457
Biological process	GO:1902617	response to fluoride	4	1	0.25	0.021586	0.0801102
Biological process	GO:0055096	low-density lipoprotein particle mediated signaling	4	1	0.25	0.021586	0.0797664
Biological process	GO:0031998	regulation of fatty acid beta-oxidation	4	1	0.25	0.021586	0.0794255
Biological process	GO:0034197	triglyceride transport	4	1	0.25	0.021586	0.0790875
Biological process	GO:2001225	regulation of chloride transport	4	1	0.25	0.021586	0.0787524
Biological process	GO:1905232	cellular response to L-glutamate	4	1	0.25	0.021586	0.0784201
Biological process	GO:1901491	negative regulation of lymphangiogenesis	4	1	0.25	0.021586	0.0780906
Biological process	GO:0006694	steroid biosynthetic process	44	2	0.0454545	0.0239691	0.086349
Biological process	GO:0070584	mitochondrion morphogenesis	44	2	0.0454545	0.0239691	0.0859892
Biological process	GO:0006810	transport	200	4	0.02	0.0240449	0.0859032
Biological process	GO:0050830	defense response to Gram-positive bacterium	114	3	0.0263158	0.0245048	0.0871845
Biological process	GO:0006487	protein N-linked glycosylation	46	2	0.0434783	0.02604	0.0922651
Biological process	GO:0019439	aromatic compound catabolic process	5	1	0.2	0.0269098	0.0949562
Biological process	GO:0032713	negative regulation of interleukin-4 production	5	1	0.2	0.0269098	0.0945686
Biological process	GO:0019563	glycerol catabolic process	5	1	0.2	0.0269098	0.0941842
Biological process	GO:0045619	regulation of lymphocyte differentiation	5	1	0.2	0.0269098	0.0938029
Biological process	GO:0031999	negative regulation of fatty acid beta-oxidation	5	1	0.2	0.0269098	0.0934247
Biological process	GO:0014012	peripheral nervous system axon regeneration	5	1	0.2	0.0269098	0.0930495
Biological process	GO:0019254	carnitine metabolic process, CoA-linked	5	1	0.2	0.0269098	0.0926773
Biological process	GO:0060761	negative regulation of response to cytokine stimulus	5	1	0.2	0.0269098	0.092308
Biological process	GO:0000303	response to superoxide	5	1	0.2	0.0269098	0.0919417
Biological process	GO:0015886	heme transport	5	1	0.2	0.0269098	0.0915783
Biological process	GO:0042992	negative regulation of transcription factor import into nucleus	5	1	0.2	0.0269098	0.0912178
Biological process	GO:0006574	valine catabolic process	5	1	0.2	0.0269098	0.0908601
Biological process	GO:1990523	bone regeneration	5	1	0.2	0.0269098	0.0905051
Biological process	GO:0032411	positive regulation of transporter activity	5	1	0.2	0.0269098	0.090153
Biological process	GO:0032849	positive regulation of cellular pH reduction	5	1	0.2	0.0269098	0.0898035
Biological process	GO:0010510	regulation of acetyl-CoA biosynthetic process from pyruvate	5	1	0.2	0.0269098	0.0894568
Biological process	GO:0036343	psychomotor behavior	5	1	0.2	0.0269098	0.0891128
Biological process	GO:0060420	regulation of heart growth	5	1	0.2	0.0269098	0.0887713
Biological process	GO:0071287	cellular response to manganese ion	5	1	0.2	0.0269098	0.0884325
Biological process	GO:2000266	regulation of blood coagulation, intrinsic pathway	5	1	0.2	0.0269098	0.0880963
Biological process	GO:0014042	positive regulation of neuron maturation	5	1	0.2	0.0269098	0.0877626
Biological process	GO:0043315	positive regulation of neutrophil degranulation	5	1	0.2	0.0269098	0.0874314
Biological process	GO:0061448	connective tissue development	5	1	0.2	0.0269098	0.0871027
Biological process	GO:0044070	regulation of anion transport	5	1	0.2	0.0269098	0.0867765
Biological process	GO:2001269	positive regulation of cysteine-type endopeptidase activity involved in apoptotic signaling pathway	5	1	0.2	0.0269098	0.0864527
Biological process	GO:0010193	response to ozone	5	1	0.2	0.0269098	0.0861313
Biological process	GO:0031623	receptor internalization	47	2	0.0425532	0.0271017	0.0864243
Biological process	GO:0045471	response to ethanol	120	3	0.025	0.0279579	0.0888257
Biological process	GO:0072593	reactive oxygen species metabolic process	48	2	0.0416667	0.0281807	0.0892042
Biological process	GO:0035458	cellular response to interferon-beta	48	2	0.0416667	0.0281807	0.0888775
Biological process	GO:0019915	lipid storage	49	2	0.0408163	0.0292767	0.0919971
Biological process	GO:0030168	platelet activation	50	2	0.04	0.0303895	0.0951466
Biological process	GO:0006695	cholesterol biosynthetic process	50	2	0.04	0.0303895	0.0948019
Biological process	GO:0035774	positive regulation of insulin secretion involved in cellular response to glucose stimulus	50	2	0.04	0.0303895	0.0944596
Biological process	GO:0043280	positive regulation of cysteine-type endopeptidase activity involved in apoptotic process	51	2	0.0392157	0.0315189	0.0976178
Biological process	GO:0043353	enucleate erythrocyte differentiation	6	1	0.166667	0.0322047	0.0993845
Biological process	GO:0015872	dopamine transport	6	1	0.166667	0.0322047	0.0990295
Biological process	GO:0006531	aspartate metabolic process	6	1	0.166667	0.0322047	0.0986771
Biological process	GO:0034121	regulation of toll-like receptor signaling pathway	6	1	0.166667	0.0322047	0.0983272
Biological process	GO:0006850	mitochondrial pyruvate transmembrane transport	6	1	0.166667	0.0322047	0.0979797
Biological process	GO:0051791	medium-chain fatty acid metabolic process	6	1	0.166667	0.0322047	0.0976347
Biological process	GO:0030242	autophagy of peroxisome	6	1	0.166667	0.0322047	0.0972922
Biological process	GO:0071470	cellular response to osmotic stress	6	1	0.166667	0.0322047	0.096952
Biological process	GO:0071726	cellular response to diacyl bacterial lipopeptide	6	1	0.166667	0.0322047	0.0966142
Biological process	GO:0038166	angiotensin-activated signaling pathway	6	1	0.166667	0.0322047	0.0962787
Biological process	GO:0015844	monoamine transport	6	1	0.166667	0.0322047	0.0959456
Biological process	GO:0043654	recognition of apoptotic cell	6	1	0.166667	0.0322047	0.0956147
Biological process	GO:0006702	androgen biosynthetic process	6	1	0.166667	0.0322047	0.0952861
Biological process	GO:0006072	glycerol-3-phosphate metabolic process	6	1	0.166667	0.0322047	0.0949598
Biological process	GO:1990845	adaptive thermogenesis	6	1	0.166667	0.0322047	0.0946357
Biological process	GO:2000121	regulation of removal of superoxide radicals	6	1	0.166667	0.0322047	0.0943138
Biological process	GO:0009642	response to light intensity	6	1	0.166667	0.0322047	0.0939941
Biological process	GO:2001236	regulation of extrinsic apoptotic signaling pathway	6	1	0.166667	0.0322047	0.0936766
Biological process	GO:0007007	inner mitochondrial membrane organization	6	1	0.166667	0.0322047	0.0933612
Biological process	GO:0099093	mitochondrial calcium release	6	1	0.166667	0.0322047	0.0930479
Biological process	GO:0045123	cellular extravasation	6	1	0.166667	0.0322047	0.0927367
Biological process	GO:0009414	response to water deprivation	6	1	0.166667	0.0322047	0.0924276
Biological process	GO:0070295	renal water absorption	6	1	0.166667	0.0322047	0.0921205
Biological process	GO:0072656	maintenance of protein location in mitochondrion	6	1	0.166667	0.0322047	0.0918155
Biological process	GO:0006585	dopamine biosynthetic process from tyrosine	6	1	0.166667	0.0322047	0.0915124
Biological process	GO:0006875	cellular metal ion homeostasis	6	1	0.166667	0.0322047	0.0912114
Biological process	GO:0033578	protein glycosylation in Golgi	6	1	0.166667	0.0322047	0.0909123
Biological process	GO:0097191	extrinsic apoptotic signaling pathway	53	2	0.0377358	0.0338266	0.0951788
Biological process	GO:0051591	response to cAMP	54	2	0.037037	0.0350045	0.0981723
Biological process	GO:0060326	cell chemotaxis	54	2	0.037037	0.0350045	0.0978536
Biological process	GO:0030198	extracellular matrix organization	134	3	0.0223881	0.0369653	0.103001
Biological process	GO:0042832	defense response to protozoan	56	2	0.0357143	0.0374075	0.103896
Biological process	GO:0006749	glutathione metabolic process	56	2	0.0357143	0.0374075	0.103562
Biological process	GO:0032489	regulation of Cdc42 protein signal transduction	7	1	0.142857	0.037471	0.103406
Biological process	GO:1902108	regulation of mitochondrial membrane permeability involved in apoptotic process	7	1	0.142857	0.037471	0.103075
Biological process	GO:0033629	negative regulation of cell adhesion mediated by integrin	7	1	0.142857	0.037471	0.102747
Biological process	GO:0042773	ATP synthesis coupled electron transport	7	1	0.142857	0.037471	0.102421
Biological process	GO:0019058	viral life cycle	7	1	0.142857	0.037471	0.102097
Biological process	GO:0042760	very long-chain fatty acid catabolic process	7	1	0.142857	0.037471	0.101775
Biological process	GO:0045039	protein import into mitochondrial inner membrane	7	1	0.142857	0.037471	0.101455
Biological process	GO:0046903	secretion	7	1	0.142857	0.037471	0.101137
Biological process	GO:0043279	response to alkaloid	7	1	0.142857	0.037471	0.10082
Biological process	GO:0015879	carnitine transport	7	1	0.142857	0.037471	0.100506
Biological process	GO:0070252	actin-mediated cell contraction	7	1	0.142857	0.037471	0.100194
Biological process	GO:0045919	positive regulation of cytolysis	7	1	0.142857	0.037471	0.0998841
Biological process	GO:0070327	thyroid hormone transport	7	1	0.142857	0.037471	0.0995758
Biological process	GO:0006475	internal protein amino acid acetylation	7	1	0.142857	0.037471	0.0992694
Biological process	GO:2000189	positive regulation of cholesterol homeostasis	7	1	0.142857	0.037471	0.0989649
Biological process	GO:0030049	muscle filament sliding	7	1	0.142857	0.037471	0.0986623
Biological process	GO:0018119	peptidyl-cysteine S-nitrosylation	7	1	0.142857	0.037471	0.0983615
Biological process	GO:0046340	diacylglycerol catabolic process	7	1	0.142857	0.037471	0.0980625
Biological process	GO:0045637	regulation of myeloid cell differentiation	7	1	0.142857	0.037471	0.0977653
Biological process	GO:0043619	regulation of transcription from RNA polymerase II promoter in response to oxidative stress	7	1	0.142857	0.037471	0.09747
Biological process	GO:0006165	nucleoside diphosphate phosphorylation	7	1	0.142857	0.037471	0.0971764
Biological process	GO:0071774	response to fibroblast growth factor	7	1	0.142857	0.037471	0.0968846
Biological process	GO:0071577	zinc II ion transmembrane transport	7	1	0.142857	0.037471	0.0965945
Biological process	GO:0140052	cellular response to oxidised low-density lipoprotein particle stimulus	7	1	0.142857	0.037471	0.0963061
Biological process	GO:0042542	response to hydrogen peroxide	57	2	0.0350877	0.0386321	0.0989947
Biological process	GO:0007229	integrin-mediated signaling pathway	141	3	0.0212766	0.0419611	0.107206
Biological process	GO:0042304	regulation of fatty acid biosynthetic process	8	1	0.125	0.0427089	0.108794
Biological process	GO:0006703	estrogen biosynthetic process	8	1	0.125	0.0427089	0.108473
Biological process	GO:0035900	response to isolation stress	8	1	0.125	0.0427089	0.108154
Biological process	GO:0044539	long-chain fatty acid import	8	1	0.125	0.0427089	0.107837
Biological process	GO:0055009	atrial cardiac muscle tissue morphogenesis	8	1	0.125	0.0427089	0.107521
Biological process	GO:0030497	fatty acid elongation	8	1	0.125	0.0427089	0.107208
Biological process	GO:0031133	regulation of axon diameter	8	1	0.125	0.0427089	0.106896
Biological process	GO:0061049	cell growth involved in cardiac muscle cell development	8	1	0.125	0.0427089	0.106586
Biological process	GO:0009635	response to herbicide	8	1	0.125	0.0427089	0.106278
Biological process	GO:0097527	necroptotic signaling pathway	8	1	0.125	0.0427089	0.105972
Biological process	GO:0071316	cellular response to nicotine	8	1	0.125	0.0427089	0.105668
Biological process	GO:0019896	axonal transport of mitochondrion	8	1	0.125	0.0427089	0.105365
Biological process	GO:0035878	nail development	8	1	0.125	0.0427089	0.105064
Biological process	GO:0045124	regulation of bone resorption	8	1	0.125	0.0427089	0.104764
Biological process	GO:0051346	negative regulation of hydrolase activity	8	1	0.125	0.0427089	0.104467
Biological process	GO:0033993	response to lipid	8	1	0.125	0.0427089	0.104171
Biological process	GO:0070585	protein localization to mitochondrion	8	1	0.125	0.0427089	0.103877
Biological process	GO:0006089	lactate metabolic process	8	1	0.125	0.0427089	0.103584
Biological process	GO:0045416	positive regulation of interleukin-8 biosynthetic process	8	1	0.125	0.0427089	0.103293
Biological process	GO:0015909	long-chain fatty acid transport	8	1	0.125	0.0427089	0.103004
Biological process	GO:0042421	norepinephrine biosynthetic process	8	1	0.125	0.0427089	0.102716
Biological process	GO:0034975	protein folding in endoplasmic reticulum	8	1	0.125	0.0427089	0.10243
Biological process	GO:0006924	activation-induced cell death of T cells	8	1	0.125	0.0427089	0.102145
Biological process	GO:0030299	intestinal cholesterol absorption	8	1	0.125	0.0427089	0.101862
Biological process	GO:0030308	negative regulation of cell growth	144	3	0.0208333	0.0442009	0.10513
Biological process	GO:0006417	regulation of translation	62	2	0.0322581	0.0449785	0.106685
Biological process	GO:0009408	response to heat	63	2	0.031746	0.0462911	0.109496
Biological process	GO:0097190	apoptotic signaling pathway	63	2	0.031746	0.0462911	0.109196
Biological process	GO:0071333	cellular response to glucose stimulus	64	2	0.03125	0.0476177	0.112019
Biological process	GO:0046324	regulation of glucose import	9	1	0.111111	0.0479183	0.112419
Biological process	GO:1902231	positive regulation of intrinsic apoptotic signaling pathway in response to DNA damage	9	1	0.111111	0.0479183	0.112113
Biological process	GO:0072655	establishment of protein localization to mitochondrion	9	1	0.111111	0.0479183	0.111809
Biological process	GO:0055091	phospholipid homeostasis	9	1	0.111111	0.0479183	0.111507
Biological process	GO:0071467	cellular response to pH	9	1	0.111111	0.0479183	0.111207
Biological process	GO:0042136	neurotransmitter biosynthetic process	9	1	0.111111	0.0479183	0.110908
Biological process	GO:0032098	regulation of appetite	9	1	0.111111	0.0479183	0.11061
Biological process	GO:0061484	hematopoietic stem cell homeostasis	9	1	0.111111	0.0479183	0.110315
Biological process	GO:0071455	cellular response to hyperoxia	9	1	0.111111	0.0479183	0.110021
Biological process	GO:0006779	porphyrin-containing compound biosynthetic process	9	1	0.111111	0.0479183	0.109728
Biological process	GO:0015695	organic cation transport	9	1	0.111111	0.0479183	0.109437
Biological process	GO:0050764	regulation of phagocytosis	9	1	0.111111	0.0479183	0.109147
Biological process	GO:0006105	succinate metabolic process	9	1	0.111111	0.0479183	0.108859
Biological process	GO:0008355	olfactory learning	9	1	0.111111	0.0479183	0.108573
Biological process	GO:0002438	acute inflammatory response to antigenic stimulus	9	1	0.111111	0.0479183	0.108288
Biological process	GO:0001778	plasma membrane repair	9	1	0.111111	0.0479183	0.108004
Biological process	GO:0008611	ether lipid biosynthetic process	9	1	0.111111	0.0479183	0.107722
Biological process	GO:1900028	negative regulation of ruffle assembly	9	1	0.111111	0.0479183	0.107442
Biological process	GO:0035456	response to interferon-beta	9	1	0.111111	0.0479183	0.107163
Biological process	GO:0010917	negative regulation of mitochondrial membrane potential	9	1	0.111111	0.0479183	0.106885
Biological process	GO:0043462	regulation of ATPase activity	9	1	0.111111	0.0479183	0.106609
Biological process	GO:0051918	negative regulation of fibrinolysis	9	1	0.111111	0.0479183	0.106334
Biological process	GO:0045110	intermediate filament bundle assembly	9	1	0.111111	0.0479183	0.106061
