# Supplementary material for: Improvement of Endothelial Dysfunction of Berberine in Atherosclerotic Mice and Mechanism Exploring through TMT-Based Proteomics
Source: Oxid Med Cell Longev. 2020 May 31;2020:8683404. doi: 10.1155/2020/8683404 (PMC7284929; doi:10.1155/2020/8683404)
Supplement: Supplementary 3 — Supplementary Table 3: the list of canonical pathways by IPA. [file 8683404.f3.xlsx]

## Sheet: Supplementary Table 3
Supplementary Table 3. The list of canonical pathways by IPA
Ingenuity Canonical Pathways	-log(p-value)	Ratio	Molecules
Mitochondrial Dysfunction	8.66	0.076	NDUFA4,Cox6c,CPT1B,MT-CO2,NDUFA1,NDUFA13,PRDX3,GPD2,MT-CYB,MT-ND3,UQCRC1,OGDH,COX4I1
Fatty Acid β-oxidation I	8.14	0.219	ACSL5,HADHB,EHHADH,ACADM,HSD17B4,HADHA,ECI1
FXR/RXR Activation	6.96	0.0794	KNG1,PON1,ALB,TTR,APOA1,SCARB1,APOA2,SAA1,FETUB,SERPINA1
Glutaryl-CoA Degradation	6.8	0.312	HADHB,EHHADH,CA1,HSD17B4,HADHA
Oxidative Phosphorylation	6.47	0.0826	NDUFA4,Cox6c,MT-CYB,MT-CO2,MT-ND3,UQCRC1,NDUFA1,COX4I1,NDUFA13
LXR/RXR Activation	6.08	0.0744	KNG1,PON1,ALB,TTR,APOA1,APOA2,CD36,SAA1,SERPINA1
TCA Cycle II (Eukaryotic)	5.84	0.208	SUCLA2,DLST,IDH3A,OGDH,IDH3B
Tryptophan Degradation III (Eukaryotic)	5.75	0.2	HADHB,EHHADH,CA1,HSD17B4,HADHA
Coagulation System	4.99	0.143	KNG1,SERPINC1,VWF,SERPINA1,SERPINE1
Valine Degradation I	4.88	0.222	HIBADH,HADHB,EHHADH,HADHA
GDP-glucose Biosynthesis	4.18	0.3	HK2,PGM5,HK3
Glucose and Glucose-1-phosphate Degradation	4.04	0.273	HK2,PGM5,HK3
Acute Phase Response Signaling	4.02	0.0471	ALB,TTR,APOA1,APOA2,SAA1,VWF,SERPINA1,SERPINE1
Atherosclerosis Signaling	4.01	0.0551	ITGB2,PON1,ALB,APOA1,APOA2,CD36,SERPINA1
Actin Cytoskeleton Signaling	3.89	0.0396	KNG1,MYH4,MYH6,MYH2,FLNA,MYLPF,ARPC4,MYL1,MYH1
Isoleucine Degradation I	3.71	0.214	HADHB,EHHADH,HADHA
Ethanol Degradation II	3.6	0.108	ACSS3,PECR,ADHFE1,ALDH3A1
Methylmalonyl Pathway	3.38	0.5	PCCA,PCCB
Fatty Acid β-oxidation III (Unsaturated, Odd Number)	3.38	0.5	EHHADH,ECI1
Trehalose Degradation II (Trehalase)	3.16	0.4	HK2,HK3
2-ketoglutarate Dehydrogenase Complex	3.16	0.4	DLST,OGDH
2-oxobutanoate Degradation I	3.16	0.4	PCCA,PCCB
PPARα/RXRα Activation	3.09	0.0389	APOA1,PRKAB1,GPD2,CPT1B,APOA2,ACOX1,CD36
Cellular Effects of Sildenafil (Viagra)	3.08	0.0458	MYH4,MYH6,MYH2,MYLPF,MYL1,MYH1
Hepatic Fibrosis / Hepatic Stellate Cell Activation	2.99	0.0374	MYH4,MYH6,MYH2,SERPINE1,FAS,MYL1,MYH1
ILK Signaling	2.86	0.0355	ITGB2,MYH4,MYH6,MYH2,FLNA,MYL1,MYH1
Epithelial Adherens Junction Signaling	2.84	0.0411	MYH4,MYH6,MYH2,ARPC4,MYL1,MYH1
Clathrin-mediated Endocytosis Signaling	2.83	0.0352	ITGB2,PON1,ALB,APOA1,APOA2,SERPINA1,ARPC4
Superpathway of Cholesterol Biosynthesis	2.79	0.107	HADHB,LSS,HADHA
Calcium Signaling	2.75	0.034	MYH4,MYH6,LETM1,MYH2,TNNC2,MYL1,MYH1
Ketogenesis	2.52	0.2	HADHB,HADHA
Ketolysis	2.52	0.2	HADHB,HADHA
UDP-N-acetyl-D-galactosamine Biosynthesis II	2.44	0.182	HK2,HK3
Noradrenaline and Adrenaline Degradation	2.34	0.075	PECR,ADHFE1,ALDH3A1
Glycogen Degradation II	2.29	0.154	PYGM,PGM5
Mevalonate Pathway I	2.29	0.154	HADHB,HADHA
Agranulocyte Adhesion and Diapedesis	2.26	0.0314	ITGB2,MYH4,MYH6,MYH2,MYL1,MYH1
Glycogen Degradation III	2.17	0.133	PYGM,PGM5
IL-12 Signaling and Production in Macrophages	2.11	0.0342	PON1,ALB,APOA1,APOA2,SERPINA1
Lanosterol Biosynthesis	2.08	1	LSS
Mitochondrial L-carnitine Shuttle Pathway	2.06	0.118	CPT1B,ACSL5
Superpathway of Geranylgeranyldiphosphate Biosynthesis I (via Mevalonate)	2.06	0.118	HADHB,HADHA
AMPK Signaling	2.01	0.0278	AK1,ACACB,PRKAB1,CKM,CPT1B,SLC2A4
LPS/IL-1 Mediated Inhibition of RXR Function	1.95	0.027	GSTA3,SCARB1,CPT1B,ACOX1,ACSL5,ALDH3A1
Sirtuin Signaling Pathway	1.93	0.024	NDUFA4,MT-CYB,CPT1B,PGAM2,MT-ND3,NDUFA1,NDUFA13
Oxidative Ethanol Degradation III	1.88	0.0952	ACSS3,ALDH3A1
Tight Junction Signaling	1.88	0.0299	MYH4,MYH6,MYH2,MYL1,MYH1
CDP-diacylglycerol Biosynthesis I	1.77	0.0833	ABHD5,GPAT4
Ethanol Degradation IV	1.74	0.08	ACSS3,ALDH3A1
Protein Kinase A Signaling	1.71	0.02	TH,MYH4,MYH2,PYGM,FLNA,MYLPF,MYL1,AKAP1
Phosphatidylglycerol Biosynthesis II (Non-plastidic)	1.7	0.0769	ABHD5,GPAT4
Caveolar-mediated Endocytosis Signaling	1.66	0.0423	ITGB2,ALB,FLNA
Production of Nitric Oxide and Reactive Oxygen Species in Macrophages	1.62	0.0258	PON1,ALB,APOA1,APOA2,SERPINA1
Glucocorticoid Receptor Signaling	1.61	0.0206	SCGB1A1,PRKAB1,KRT7,KRT222,KRT79,SERPINE1,TAF15
Biotin-carboxyl Carrier Protein Assembly	1.6	0.333	ACACB
Serotonin Degradation	1.59	0.0395	PECR,ADHFE1,ALDH3A1
Catecholamine Biosynthesis	1.48	0.25	TH
Glycerol-3-phosphate Shuttle	1.48	0.25	GPD2
Acetate Conversion to Acetyl-CoA	1.48	0.25	ACSS3
Superpathway of Methionine Degradation	1.42	0.0541	PCCA,PCCB
Regulation of Actin-based Motility by Rho	1.4	0.0333	MYLPF,ARPC4,MYL1
Type II Diabetes Mellitus Signaling	1.39	0.026	PRKAB1,CD36,ACSL5,SLC2A4
Creatine-phosphate Biosynthesis	1.39	0.2	CKM
Estrogen Biosynthesis	1.36	0.05	DHRS11,HSD17B4
Intrinsic Prothrombin Activation Pathway	1.32	0.0476	KNG1,SERPINC1
Glycerol Degradation I	1.31	0.167	GPD2
Rapoport-Luebering Glycolytic Shunt	1.31	0.167	PGAM2
Cdc42 Signaling	1.28	0.024	MYLPF,HLA-DRB5,ARPC4,MYL1
Stearate Biosynthesis I (Animals)	1.28	0.0455	ACSL5,DHRS11
Triacylglycerol Biosynthesis	1.25	0.0435	ABHD5,GPAT4
Acetyl-CoA Biosynthesis I (Pyruvate Dehydrogenase Complex)	1.24	0.143	DLAT
Autoimmune Thyroid Disease Signaling	1.23	0.0426	FAS,HLA-DRB5
Graft-versus-Host Disease Signaling	1.21	0.0417	FAS,HLA-DRB5
Triacylglycerol Degradation	1.14	0.0377	Ces1b/Ces1c,MGLL
Leucine Degradation I	1.14	0.111	ACADM
RhoA Signaling	1.07	0.0242	MYLPF,ARPC4,MYL1
Role of IL-17A in Psoriasis	0.985	0.0769	S100A9
Fatty Acid Activation	0.985	0.0769	ACSL5
Choline Biosynthesis III	0.985	0.0769	GPLD1
Cholesterol Biosynthesis I	0.985	0.0769	LSS
Bile Acid Biosynthesis, Neutral Pathway	0.985	0.0769	AMACR
Cholesterol Biosynthesis II (via 24,25-dihydrolanosterol)	0.985	0.0769	LSS
Cholesterol Biosynthesis III (via Desmosterol)	0.985	0.0769	LSS
Aryl Hydrocarbon Receptor Signaling	0.94	0.0213	GSTA3,ALDH3A1,FAS
Extrinsic Prothrombin Activation Pathway	0.9	0.0625	SERPINC1
Vitamin-C Transport	0.9	0.0625	SLC2A4
γ-linolenate Biosynthesis II (Animals)	0.876	0.0588	ACSL5
Estrogen-Dependent Breast Cancer Signaling	0.849	0.0253	DHRS11,HSD17B4
Methylglyoxal Degradation III	0.831	0.0526	DHRS11
Histamine Degradation	0.831	0.0526	ALDH3A1
Allograft Rejection Signaling	0.807	0.0238	FAS,HLA-DRB5
Fatty Acid α-oxidation	0.773	0.0455	ALDH3A1
Crosstalk between Dendritic Cells and Natural Killer Cells	0.768	0.0225	FAS,HLA-DRB5
Altered T Cell and B Cell Signaling in Rheumatoid Arthritis	0.76	0.0222	FAS,HLA-DRB5
eNOS Signaling	0.758	0.0174	KNG1,AQP7,PRKAB1
Pyrimidine Deoxyribonucleotides De Novo Biosynthesis I	0.755	0.0435	AK1
Putrescine Degradation III	0.755	0.0435	ALDH3A1
Tumoricidal Function of Hepatic Natural Killer Cells	0.738	0.0417	FAS
Fcγ Receptor-mediated Phagocytosis in Macrophages and Monocytes	0.738	0.0215	GPLD1,ARPC4
RhoGDI Signaling	0.733	0.0169	MYLPF,ARPC4,MYL1
Tryptophan Degradation X (Mammalian, via Tryptamine)	0.722	0.04	ALDH3A1
Glycolysis I	0.707	0.0385	PGAM2
Gluconeogenesis I	0.707	0.0385	PGAM2
TR/RXR Activation	0.704	0.0204	UCP3,SCARB1
PAK Signaling	0.684	0.0198	MYLPF,MYL1
Virus Entry via Endocytic Pathways	0.678	0.0196	ITGB2,FLNA
Acetone Degradation I (to Methylglyoxal)	0.652	0.0333	DHRS11
Antioxidant Action of Vitamin C	0.641	0.0185	GPLD1,SLC2A4
Glutathione-mediated Detoxification	0.639	0.0323	GSTA3
Cytotoxic T Lymphocyte-mediated Apoptosis of Target Cells	0.627	0.0312	FAS
Type I Diabetes Mellitus Signaling	0.624	0.018	FAS,HLA-DRB5
Inhibition of Angiogenesis by TSP1	0.605	0.0294	CD36
B Cell Development	0.594	0.0286	HLA-DRB5
Neuroprotective Role of THOP1 in Alzheimer's Disease	0.581	0.0168	KNG1,DPP4
Dopamine Degradation	0.573	0.027	ALDH3A1
Complement System	0.573	0.027	ITGB2
Antigen Presentation Pathway	0.563	0.0263	HLA-DRB5
CD28 Signaling in T Helper Cells	0.519	0.0152	HLA-DRB5,ARPC4
Gα12/13 Signaling	0.506	0.0148	MYLPF,MYL1
Th1 Pathway	0.506	0.0148	ITGB2,HLA-DRB5
Pyrimidine Ribonucleotides Interconversion	0.502	0.0222	AK1
Pyrimidine Ribonucleotides De Novo Biosynthesis	0.486	0.0213	AK1
Phospholipase C Signaling	0.485	0.0124	MYLPF,GPLD1,MYL1
Assembly of RNA Polymerase II Complex	0.464	0.02	TAF15
Phagosome Maturation	0.454	0.0135	TCIRG1,HLA-DRB5
Signaling by Rho Family GTPases	0.453	0.0119	MYLPF,ARPC4,MYL1
Th2 Pathway	0.447	0.0133	ITGB2,HLA-DRB5
Actin Nucleation by ARP-WASP Complex	0.425	0.0179	ARPC4
Nur77 Signaling in T Lymphocytes	0.408	0.0169	HLA-DRB5
Induction of Apoptosis by HIV1	0.397	0.0164	FAS
CXCR4 Signaling	0.396	0.0121	MYLPF,MYL1
Phospholipases	0.391	0.0161	GPLD1
Netrin Signaling	0.376	0.0154	ENAH
Calcium-induced T Lymphocyte Apoptosis	0.371	0.0152	HLA-DRB5
Agrin Interactions at Neuromuscular Junction	0.356	0.0145	ITGB2
Remodeling of Epithelial Adherens Junctions	0.356	0.0145	ARPC4
Myc Mediated Apoptosis Signaling	0.352	0.0143	FAS
Melatonin Signaling	0.343	0.0139	SLC2A4
MSP-RON Signaling Pathway	0.343	0.0139	ITGB2
T Helper Cell Differentiation	0.338	0.0137	HLA-DRB5
Th1 and Th2 Activation Pathway	0.338	0.0108	ITGB2,HLA-DRB5
STAT3 Pathway	0.334	0.0135	NDUFA13
Heparan Sulfate Biosynthesis (Late Stages)	0.33	0.0133	Ces1b/Ces1c
Hypoxia Signaling in the Cardiovascular System	0.33	0.0133	SLC2A4
GDNF Family Ligand-Receptor Interactions	0.326	0.0132	PDLIM7
Dopamine Receptor Signaling	0.322	0.013	TH
NRF2-mediated Oxidative Stress Response	0.318	0.0104	GSTA3,SCARB1
IL-8 Signaling	0.308	0.0102	ITGB2,GPLD1
Macropinocytosis Signaling	0.306	0.0123	ITGB2
Heparan Sulfate Biosynthesis	0.302	0.0122	Ces1b/Ces1c
mTOR Signaling	0.299	0.00995	PRKAB1,GPLD1
Thrombin Signaling	0.292	0.0098	MYLPF,MYL1
Growth Hormone Signaling	0.292	0.0118	SLC2A4
α-Adrenergic Signaling	0.285	0.0115	PYGM
NF-κB Activation by Viruses	0.285	0.0115	ITGB2
PEDF Signaling	0.285	0.0115	FAS
HIPPO signaling	0.285	0.0115	NF2
TGF-β Signaling	0.285	0.0115	SERPINE1
HER-2 Signaling in Breast Cancer	0.281	0.0114	ITGB2
IL-4 Signaling	0.278	0.0112	HLA-DRB5
Apoptosis Signaling	0.275	0.0111	FAS
Osteoarthritis Pathway	0.275	0.00943	PRKAB1,S100A9
OX40 Signaling Pathway	0.272	0.011	HLA-DRB5
Reelin Signaling in Neurons	0.268	0.0109	ITGB2
Acute Myeloid Leukemia Signaling	0.265	0.0108	IDH3B
Death Receptor Signaling	0.265	0.0108	FAS
Communication between Innate and Adaptive Immune Cells	0.262	0.0106	HLA-DRB5
Integrin Signaling	0.261	0.00913	ITGB2,ARPC4
CCR5 Signaling in Macrophages	0.259	0.0105	FAS
Salvage Pathways of Pyrimidine Ribonucleotides	0.259	0.0105	AK1
Sumoylation Pathway	0.256	0.0104	FAS
Cardiac Hypertrophy Signaling	0.23	0.00847	MYLPF,MYL1
Amyotrophic Lateral Sclerosis Signaling	0.217	0.00901	NEFL
p53 Signaling	0.217	0.00901	FAS
Paxillin Signaling	0.212	0.00885	ITGB2
Nitric Oxide Signaling in the Cardiovascular System	0.212	0.00885	KNG1
Glioma Signaling	0.21	0.00877	IDH3B
Rac Signaling	0.203	0.00855	ARPC4
HIF1α Signaling	0.201	0.00847	SLC2A4
